# Supplementary material
Source: PubMed Central journal article supplement (PMC4104769)
Supplement: NIHMS592403-supplement-01.pdf [file NIHMS592403-supplement-01.pdf]

# Supplementary Data

## *Synthesis, Biological, and Biophysical Studies of DAG-indololactones Designed as Selective Activators of RasGRP.*

Lia C. Garcia<sup>1</sup>, Lucia Gandolfi Donadío<sup>1</sup>, Ella Mann<sup>3</sup>, Sofiya Kolusheva<sup>3</sup>, Noemi Kedei<sup>2</sup>, Nancy E. Lewin<sup>2</sup>, Colin S. Hill<sup>2</sup>, Jessica S. Kelsey<sup>2</sup>, Jing Yang<sup>2</sup>, Timothy E. Esch<sup>2</sup>, Marina Santos<sup>1</sup>, Megan L. Peach<sup>4</sup>, James A. Kelley<sup>5</sup>, Peter M. Blumberg<sup>2</sup>, Raz Jelinek<sup>3</sup>, Victor E. Marquez<sup>5</sup> and Maria J. Comin<sup>1</sup>

<sup>1</sup> Laboratory of Organic Synthesis, Center of Research and Development in Chemistry, National Institute of Industrial Technology, Buenos Aires, Argentina.

<sup>2</sup> Laboratory of Cancer Biology and Genetics, Center for Cancer Research, National Cancer Institute, Bethesda, MD 20892, USA.

<sup>3</sup> Department of Chemistry, Ben Gurion University, Beer Sheva 84105, Israel.

<sup>4</sup> Basic Science Program, Leidos Biomedical, Inc., Chemical Biology Laboratory, Frederick National Laboratory for Cancer Research, National Institutes of Health, Frederick, MD 21702, USA.

<sup>5</sup> Chemical Biology Laboratory, Molecular Discovery Program, Center for Cancer Research, National Cancer Institute at Frederick, National Institutes of Health, Frederick, MD 21702, U.S.A.

## Table of Contents

|                                              |     |
|----------------------------------------------|-----|
| General Information .....                    | S4  |
| <sup>1</sup> H-NMR <b>7a</b> Spectra .....   | S5  |
| <sup>13</sup> C-NMR <b>7a</b> Spectra .....  | S6  |
| <sup>1</sup> H-NMR <b>7b</b> Spectra .....   | S7  |
| <sup>13</sup> C-NMR <b>7b</b> Spectra .....  | S8  |
| <sup>1</sup> H-NMR <b>8</b> Spectra .....    | S9  |
| <sup>13</sup> C-NMR <b>8</b> Spectra .....   | S10 |
| <sup>1</sup> H-NMR <b>9</b> Spectra .....    | S11 |
| <sup>13</sup> C-NMR <b>9</b> Spectra .....   | S12 |
| <sup>1</sup> H-NMR <b>10</b> Spectra .....   | S13 |
| <sup>13</sup> C-NMR <b>10</b> Spectra .....  | S14 |
| <sup>1</sup> H-NMR <b>11</b> Spectra .....   | S15 |
| <sup>13</sup> C-NMR <b>11</b> Spectra .....  | S16 |
| HRMS <b>11</b> Spectra .....                 | S17 |
| Elemental Analyses <b>11</b> .....           | S18 |
| <sup>1</sup> H-NMR <b>12a</b> Spectra .....  | S19 |
| <sup>13</sup> C-NMR <b>12a</b> Spectra ..... | S20 |
| <sup>1</sup> H-NMR <b>12b</b> Spectra .....  | S21 |
| <sup>13</sup> C-NMR <b>12b</b> Spectra ..... | S22 |
| <sup>1</sup> H-NMR <b>12c</b> Spectra .....  | S23 |
| <sup>13</sup> C-NMR <b>12c</b> Spectra ..... | S24 |
| <sup>1</sup> H-NMR <b>12d</b> Spectra .....  | S25 |
| <sup>13</sup> C-NMR <b>12d</b> Spectra ..... | S26 |
| <sup>1</sup> H-NMR <b>13a</b> Spectra .....  | S27 |
| <sup>13</sup> C-NMR <b>13a</b> Spectra ..... | S28 |
| <sup>1</sup> H-NMR <b>13b</b> Spectra .....  | S29 |
| <sup>13</sup> C-NMR <b>13b</b> Spectra ..... | S30 |
| <sup>1</sup> H-NMR <b>13c</b> Spectra .....  | S31 |
| <sup>13</sup> C-NMR <b>13c</b> Spectra ..... | S32 |

|                                                                            |     |
|----------------------------------------------------------------------------|-----|
| <sup>1</sup> H-NMR <b>13d</b> Spectra .....                                | S33 |
| <sup>13</sup> C-NMR <b>13d</b> Spectra .....                               | S34 |
| <sup>1</sup> H-NMR <b>14a</b> Spectra .....                                | S35 |
| <sup>13</sup> C-NMR <b>14a</b> Spectra .....                               | S36 |
| <sup>1</sup> H-NMR <b>14c</b> Spectra .....                                | S37 |
| <sup>13</sup> C-NMR <b>14c</b> Spectra .....                               | S38 |
| <sup>1</sup> H-NMR <b>14d</b> Spectra .....                                | S39 |
| <sup>13</sup> C-NMR <b>14d</b> Spectra .....                               | S40 |
| <sup>1</sup> H-NMR <b>2</b> Spectra .....                                  | S41 |
| <sup>13</sup> C-NMR <b>2</b> Spectra .....                                 | S42 |
| HRMS <b>2</b> Spectra .....                                                | S43 |
| <sup>1</sup> H-NMR <b>3</b> Spectra .....                                  | S44 |
| <sup>13</sup> C-NMR <b>3</b> Spectra .....                                 | S45 |
| HRMS <b>3</b> Spectra .....                                                | S46 |
| <sup>1</sup> H-NMR <b>4</b> Spectra .....                                  | S47 |
| <sup>13</sup> C-NMR <b>4</b> Spectra .....                                 | S48 |
| HRMS <b>4</b> Spectra .....                                                | S49 |
| Elemental Analyses <b>4</b> .....                                          | S50 |
| <sup>1</sup> H-NMR <b>5</b> Spectra .....                                  | S51 |
| <sup>13</sup> C-NMR <b>5</b> Spectra .....                                 | S52 |
| HRMS <b>5</b> Spectra .....                                                | S53 |
| Elemental Analyses <b>5</b> .....                                          | S54 |
| <b>Biological Activity of Compounds 1 to 5</b>                             |     |
| – Supplementary Figure 1 .....                                             | S55 |
| – Supplementary Figure 2 .....                                             | S56 |
| <b>Translocation Induced by PDBu</b>                                       |     |
| – Supplementary Figure 3 .....                                             | S57 |
| <b>Fluorescence Measurements of Compounds 1 to 5 in Different Solvents</b> |     |
| – Supplementary Figure 4 .....                                             | S58 |
| – Experimental Procedure .....                                             | S59 |

## General Information

$^1\text{H}$  and  $^{13}\text{C}$  NMR spectra were recorded on a Bruker Avance DPX 400 instrument at 400 and 100 MHz, respectively. Spectra are referenced to the solvent in which they were run (7.26 ppm for  $\text{CDCl}_3$ ). High resolution MS analysis was conducted on a Thermo-Fisher LTQ-XL Orbitrap hybrid mass spectrometer operated at a resolution of 30,000 (FWHM) using either FIA or LC/MS sample introduction, depending on which mode was the most suitable based on previous low resolution analyses. For LC/MS analyses on the Orbitrap, a narrow-bore (50 X 2.1 mm) Zorbax Rapid-Resolution reversed-phase C18 column coupled with a C18 guard column was eluted with a 5-90% gradient of  $\text{CH}_3\text{CN}/\text{H}_2\text{O}$  containing 0.1%  $\text{HCOOH}$  at 250  $\mu\text{l}/\text{min}$ . The resulting accurate mass measurement of a molecular species ( $[\text{M}+\text{H}]^+$ ,  $[\text{M}+\text{Na}]^+$  or  $[\text{M}+\text{NH}_4]^+$ ) was then used to determine a unique elemental composition for each particular compound. Where appropriate,  $^1\text{H}$  and  $^{13}\text{C}$  NMR data were used to set elemental constraints for this calculation. Elemental analyses were performed by Atlantic Microlab, Inc., Norcross, GA and by UMYMFOR-CONICET, Argentina.

7a

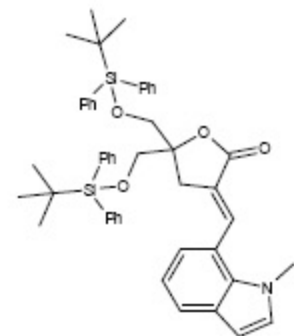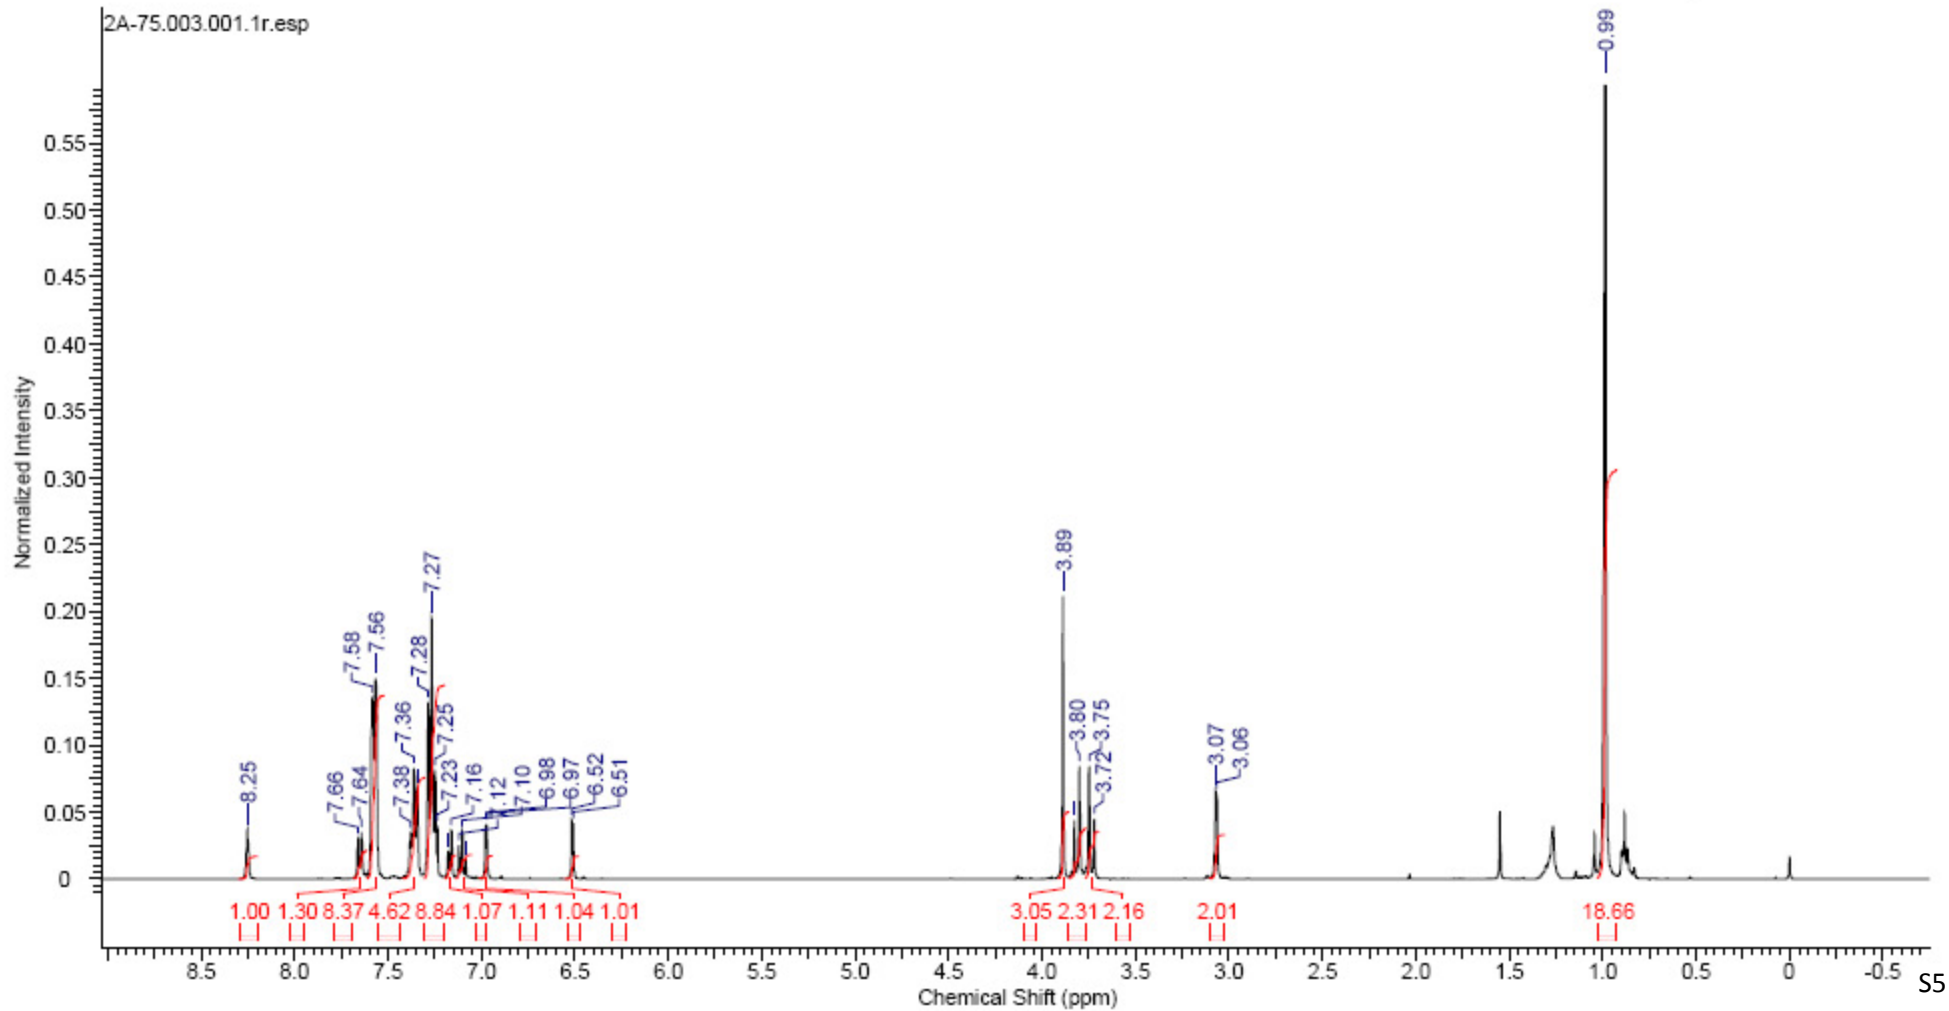

# 7a

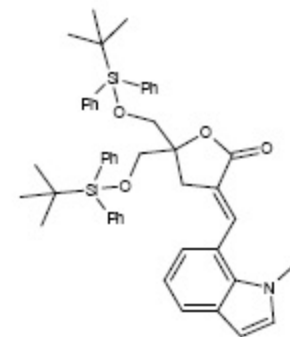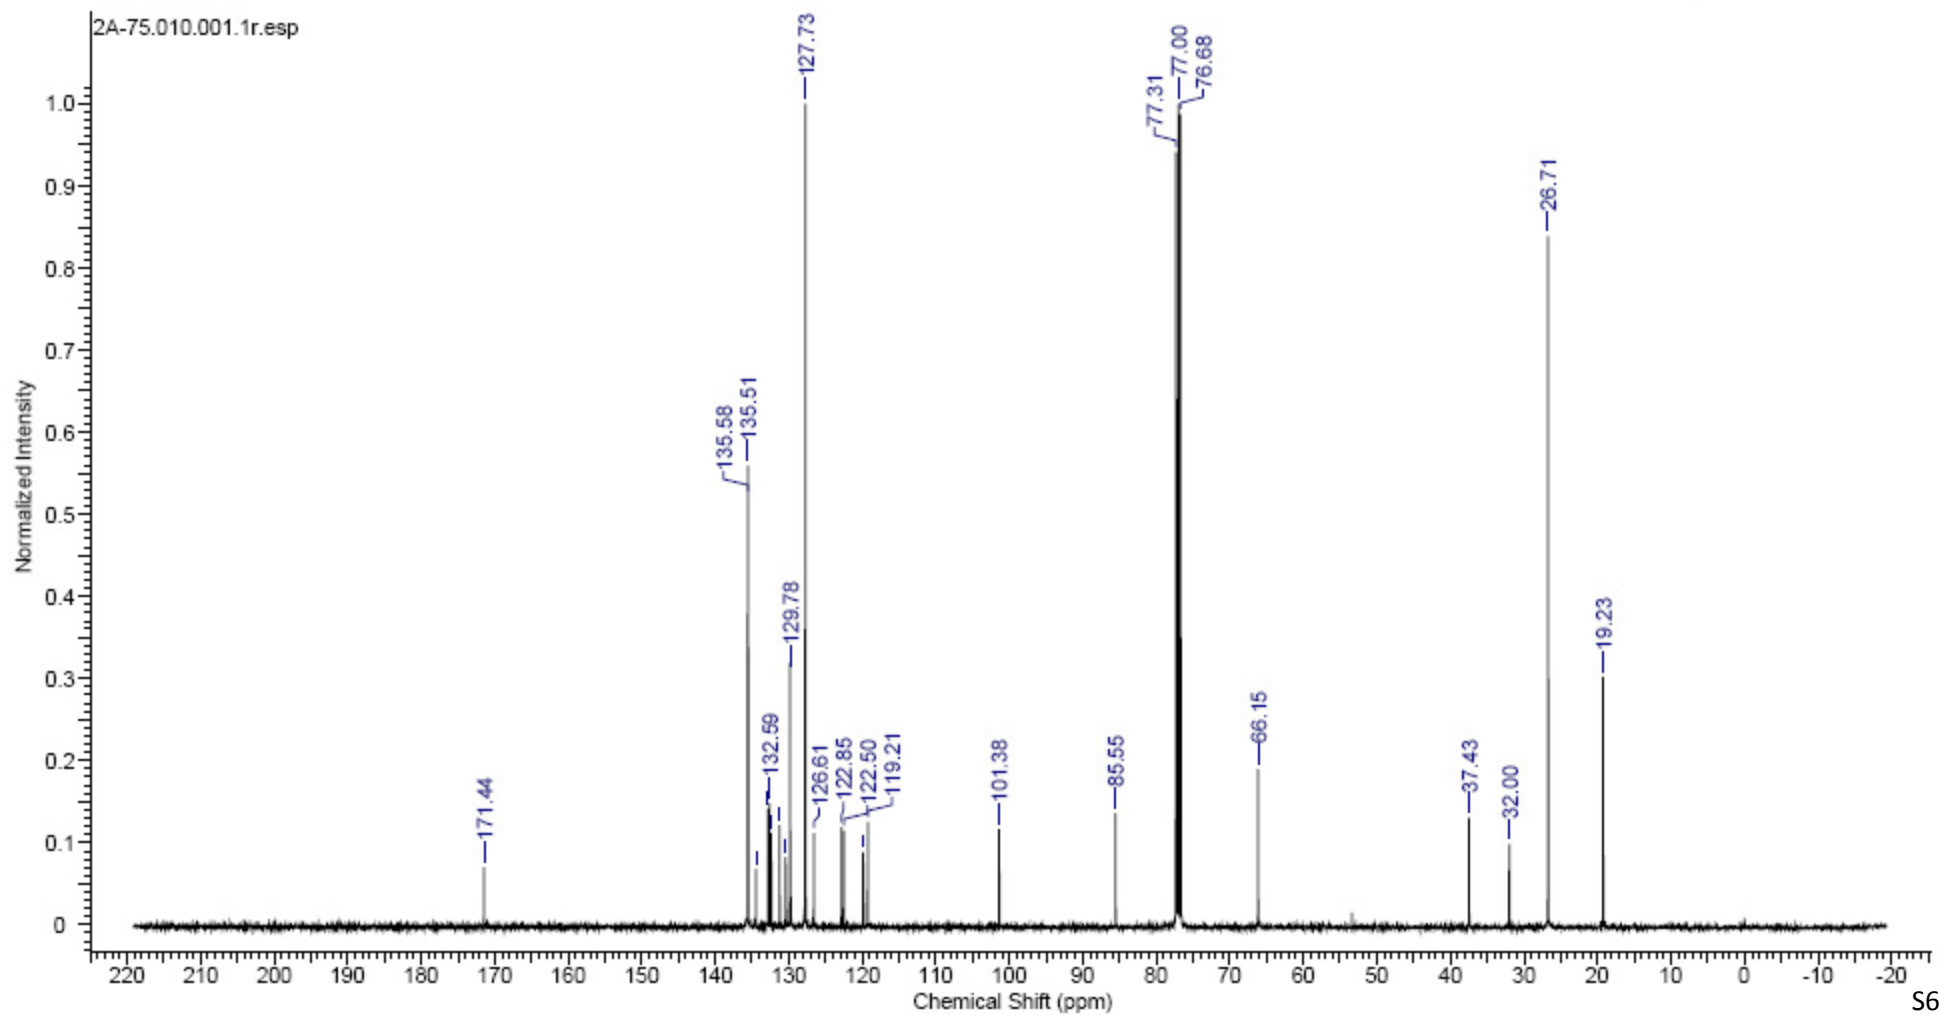

# 7b

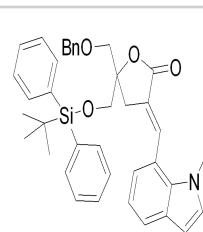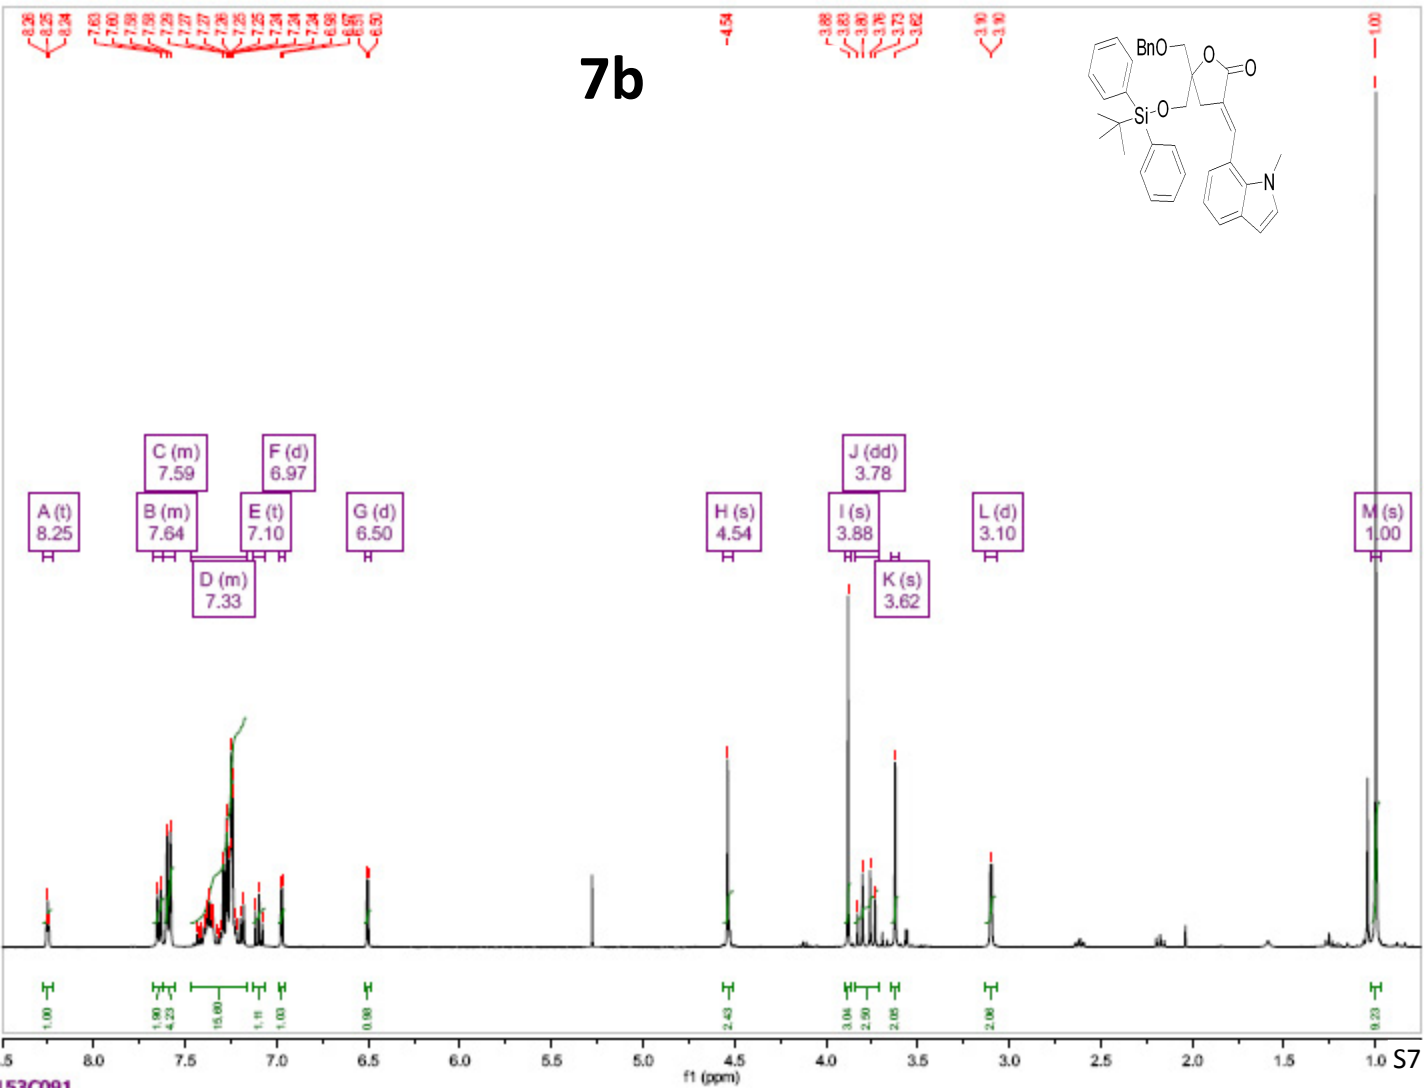

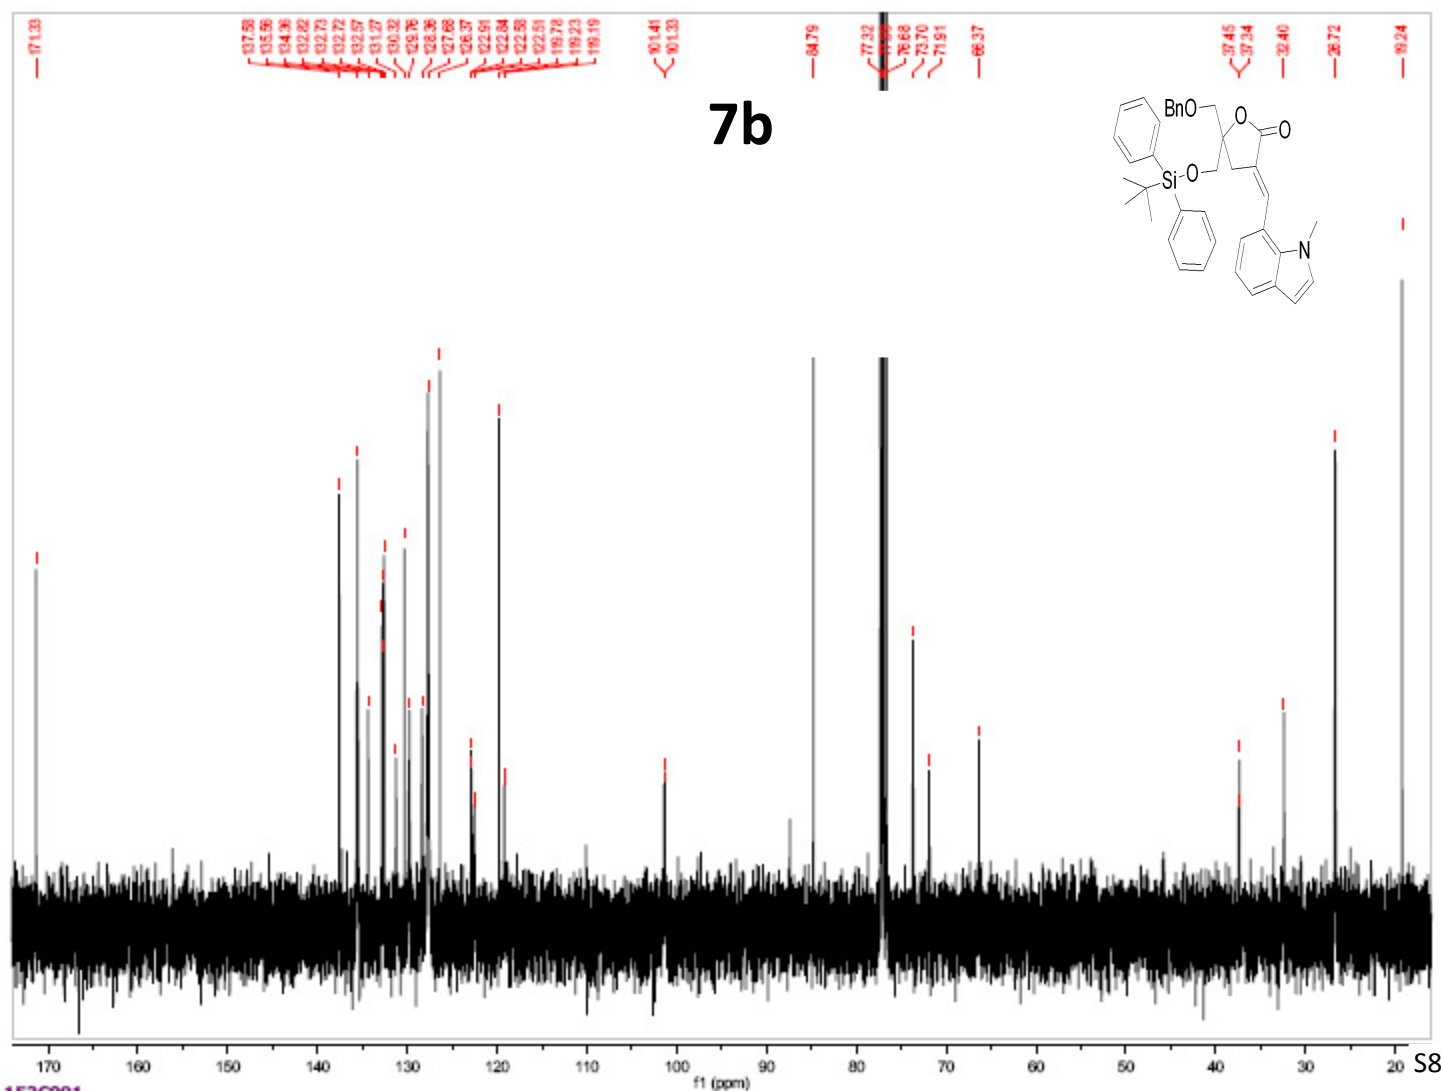



8

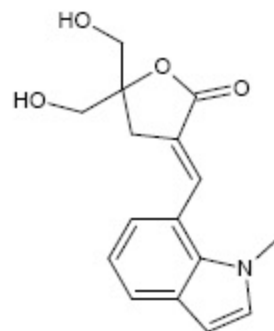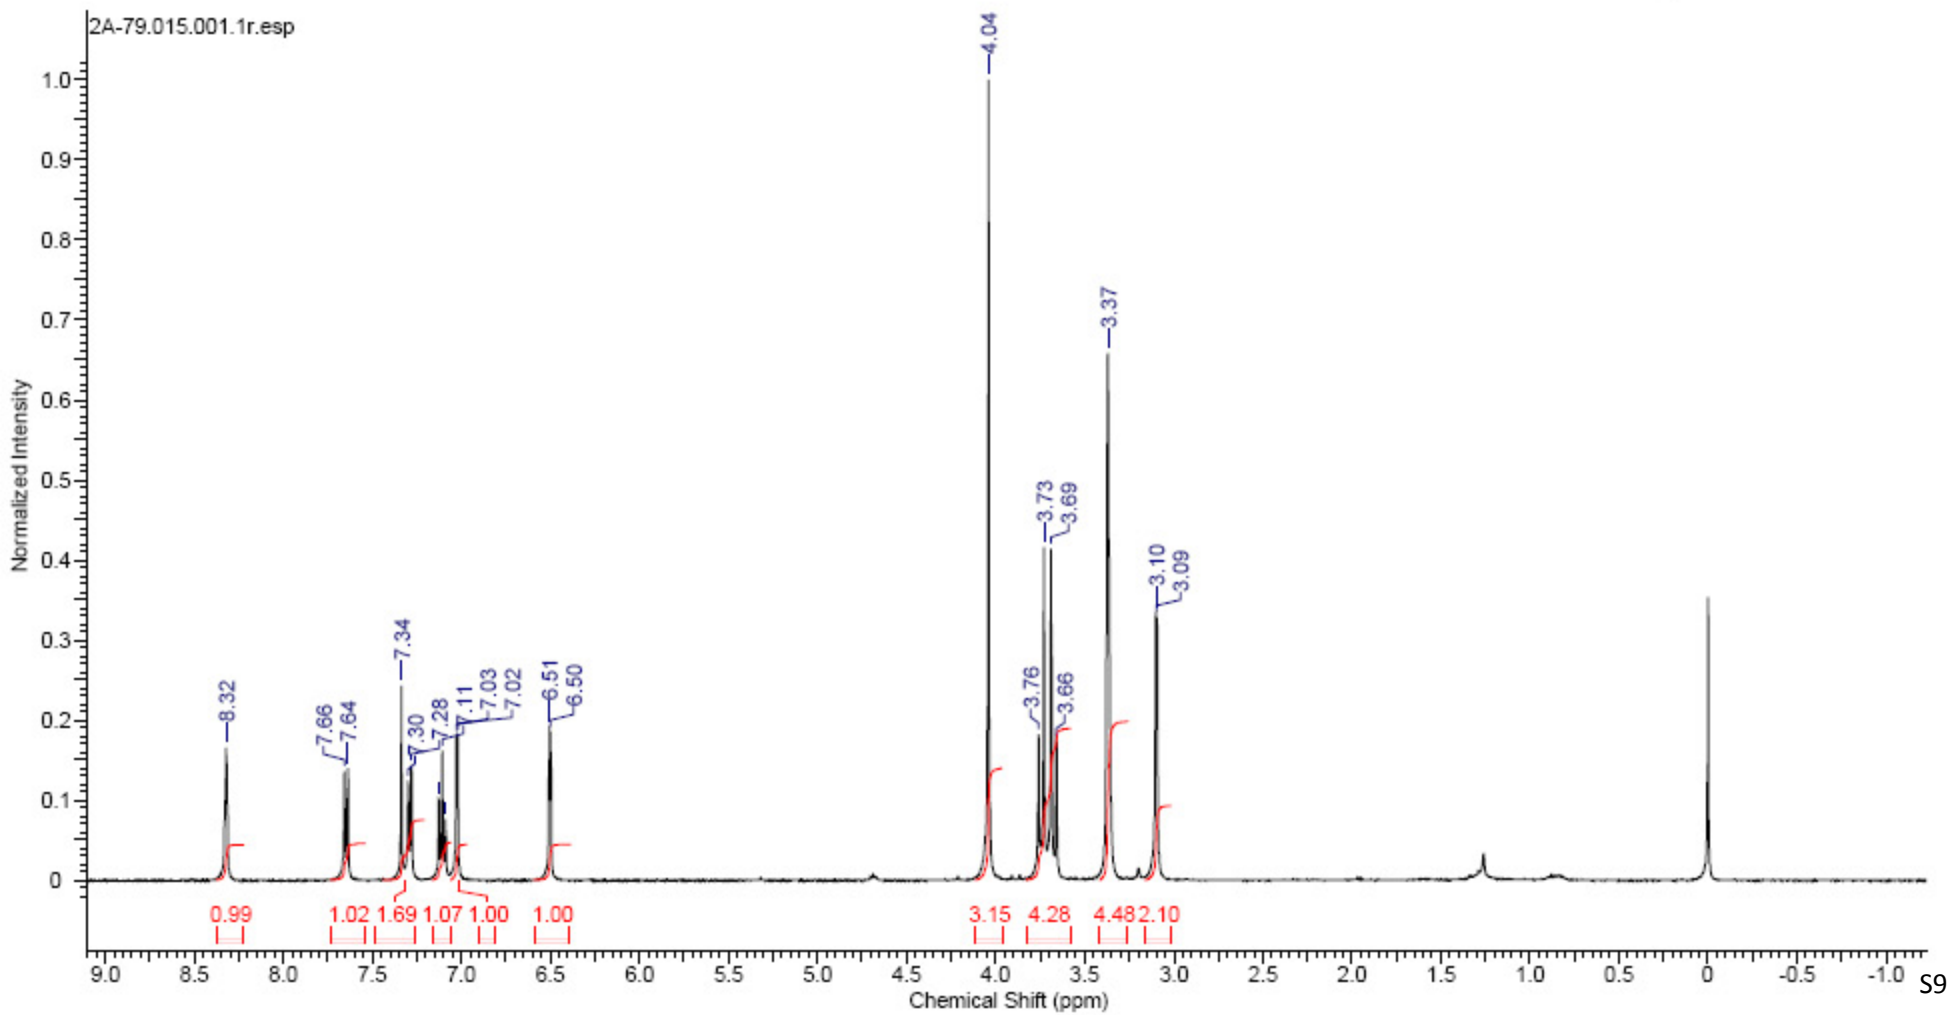

8

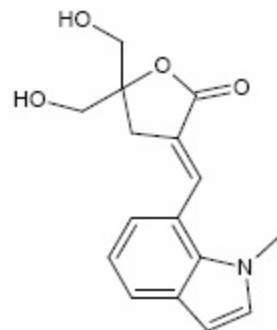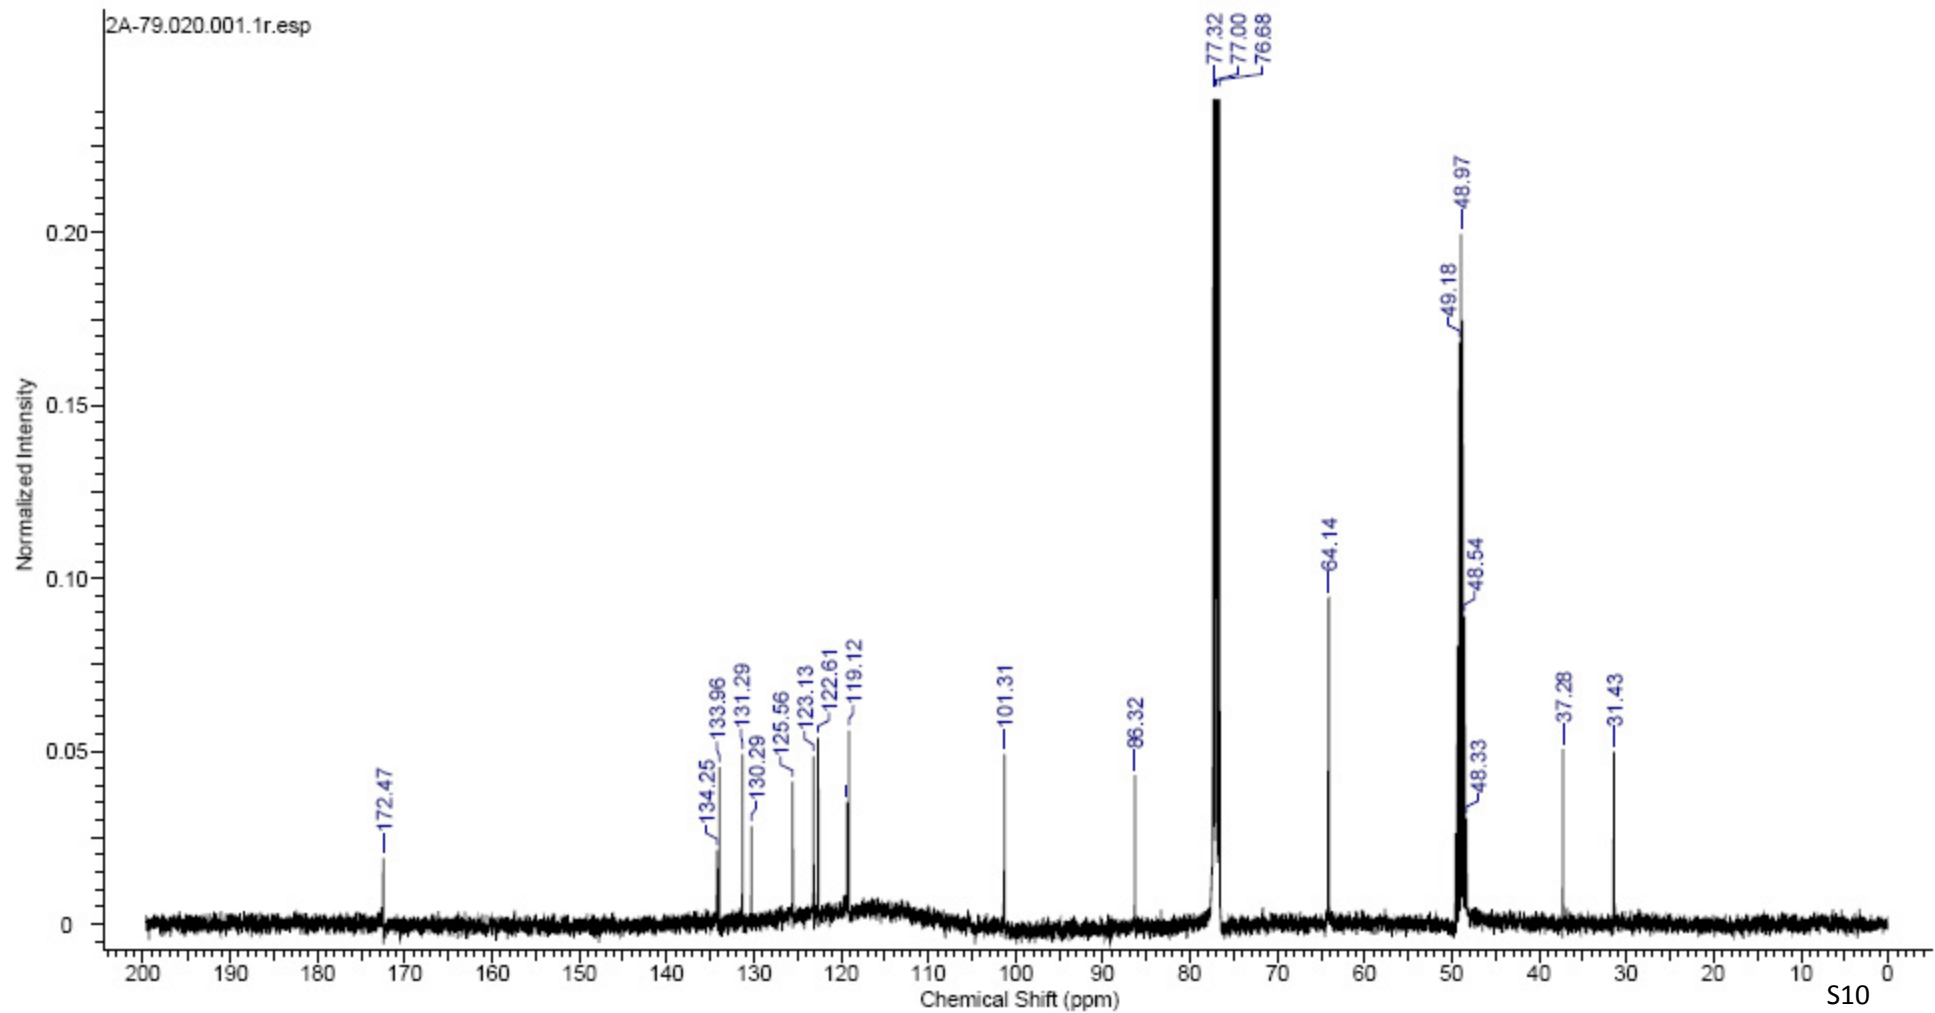

9

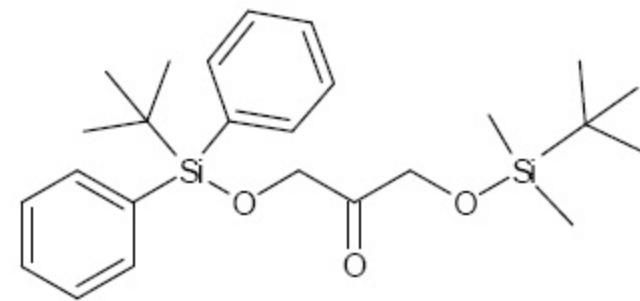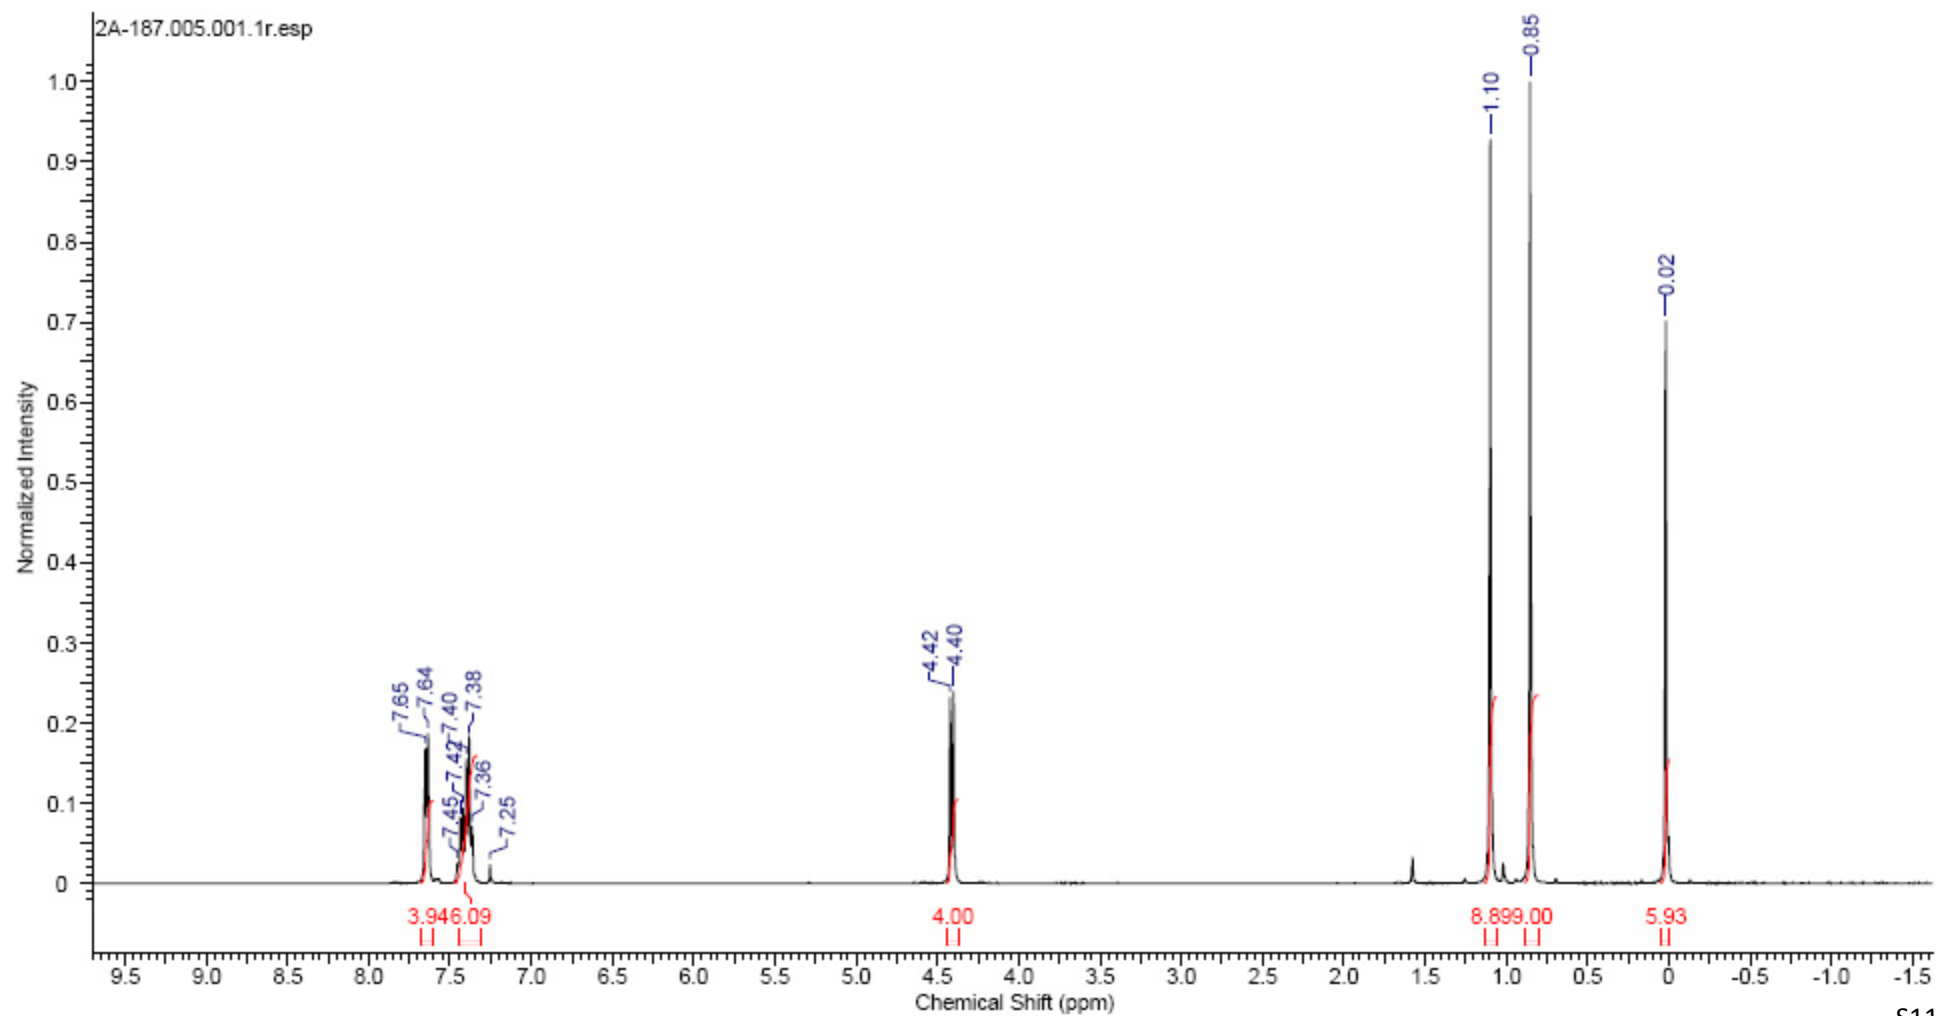

9

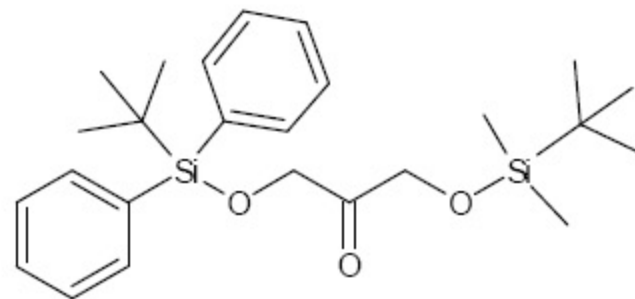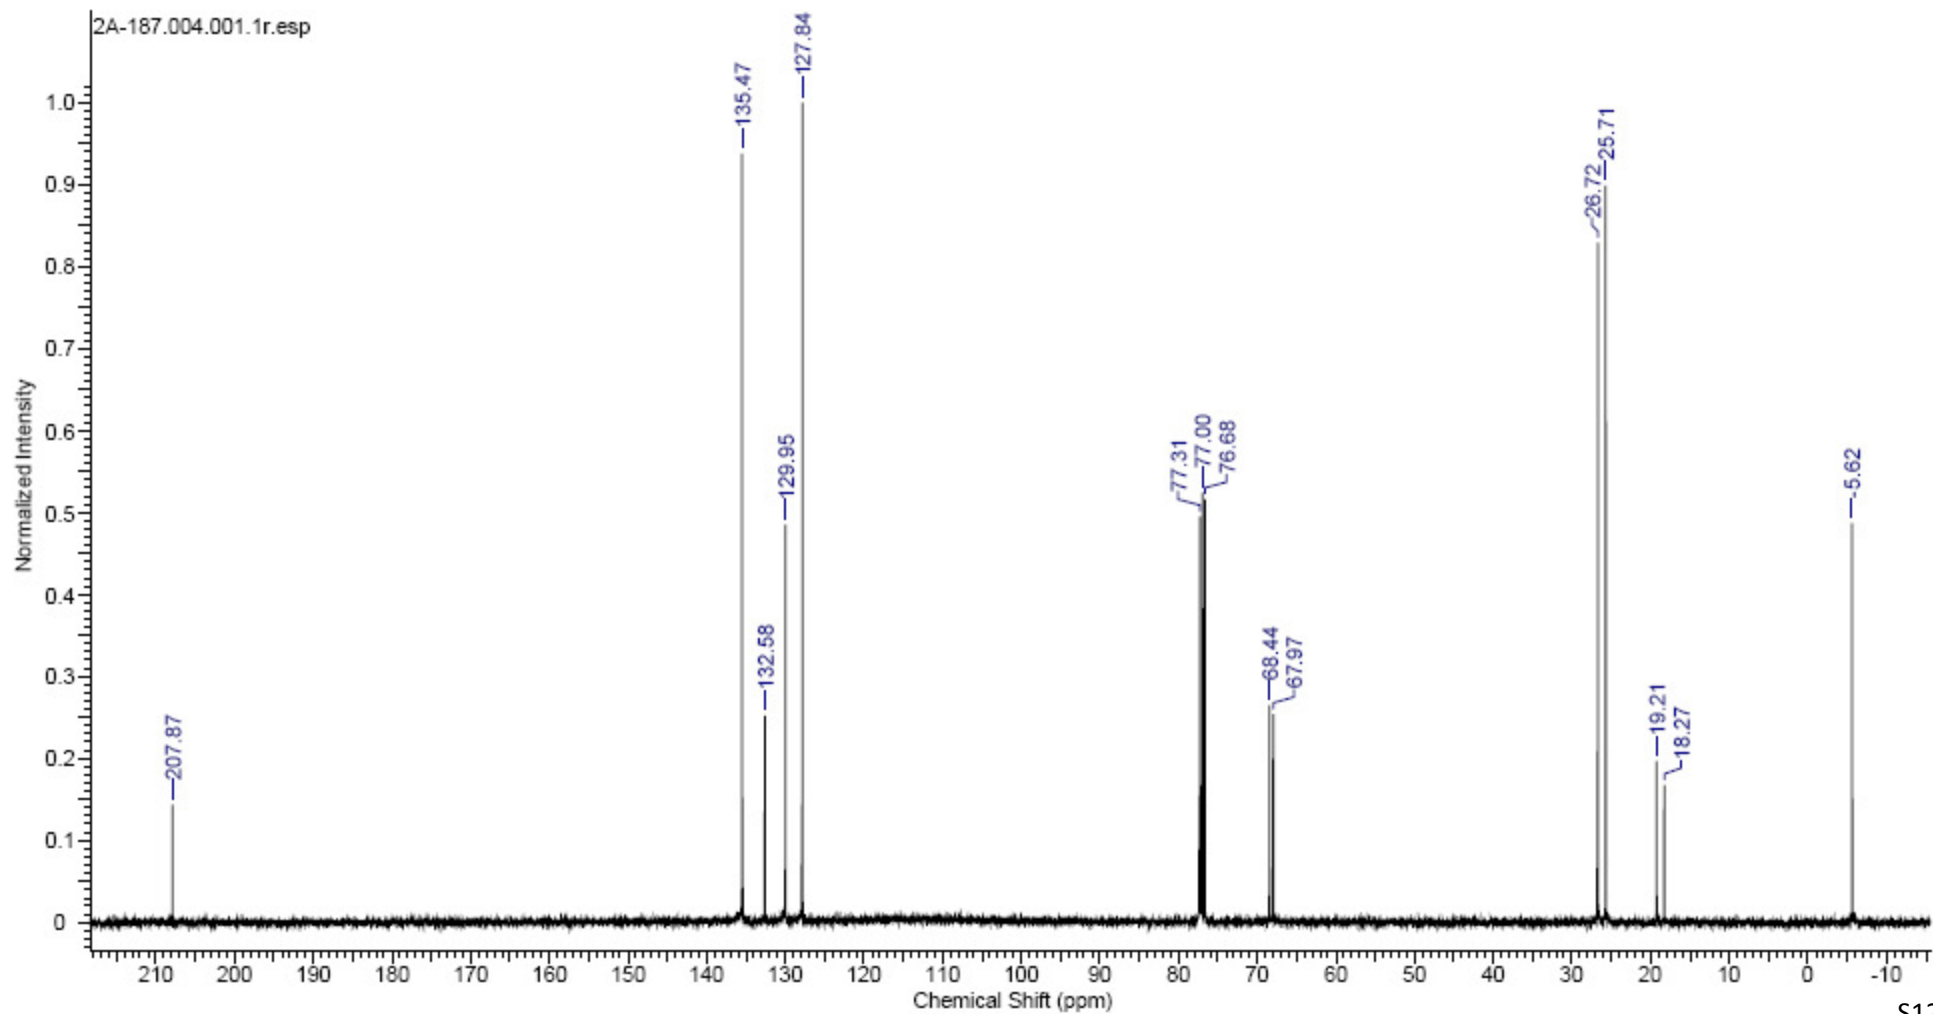

10

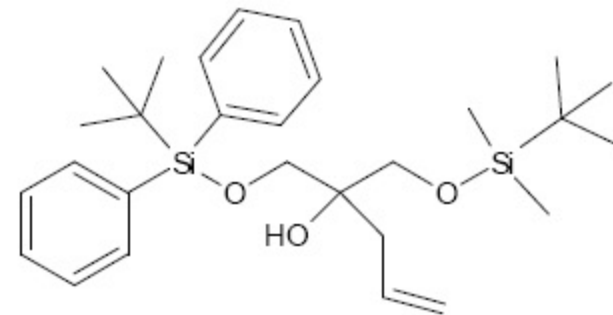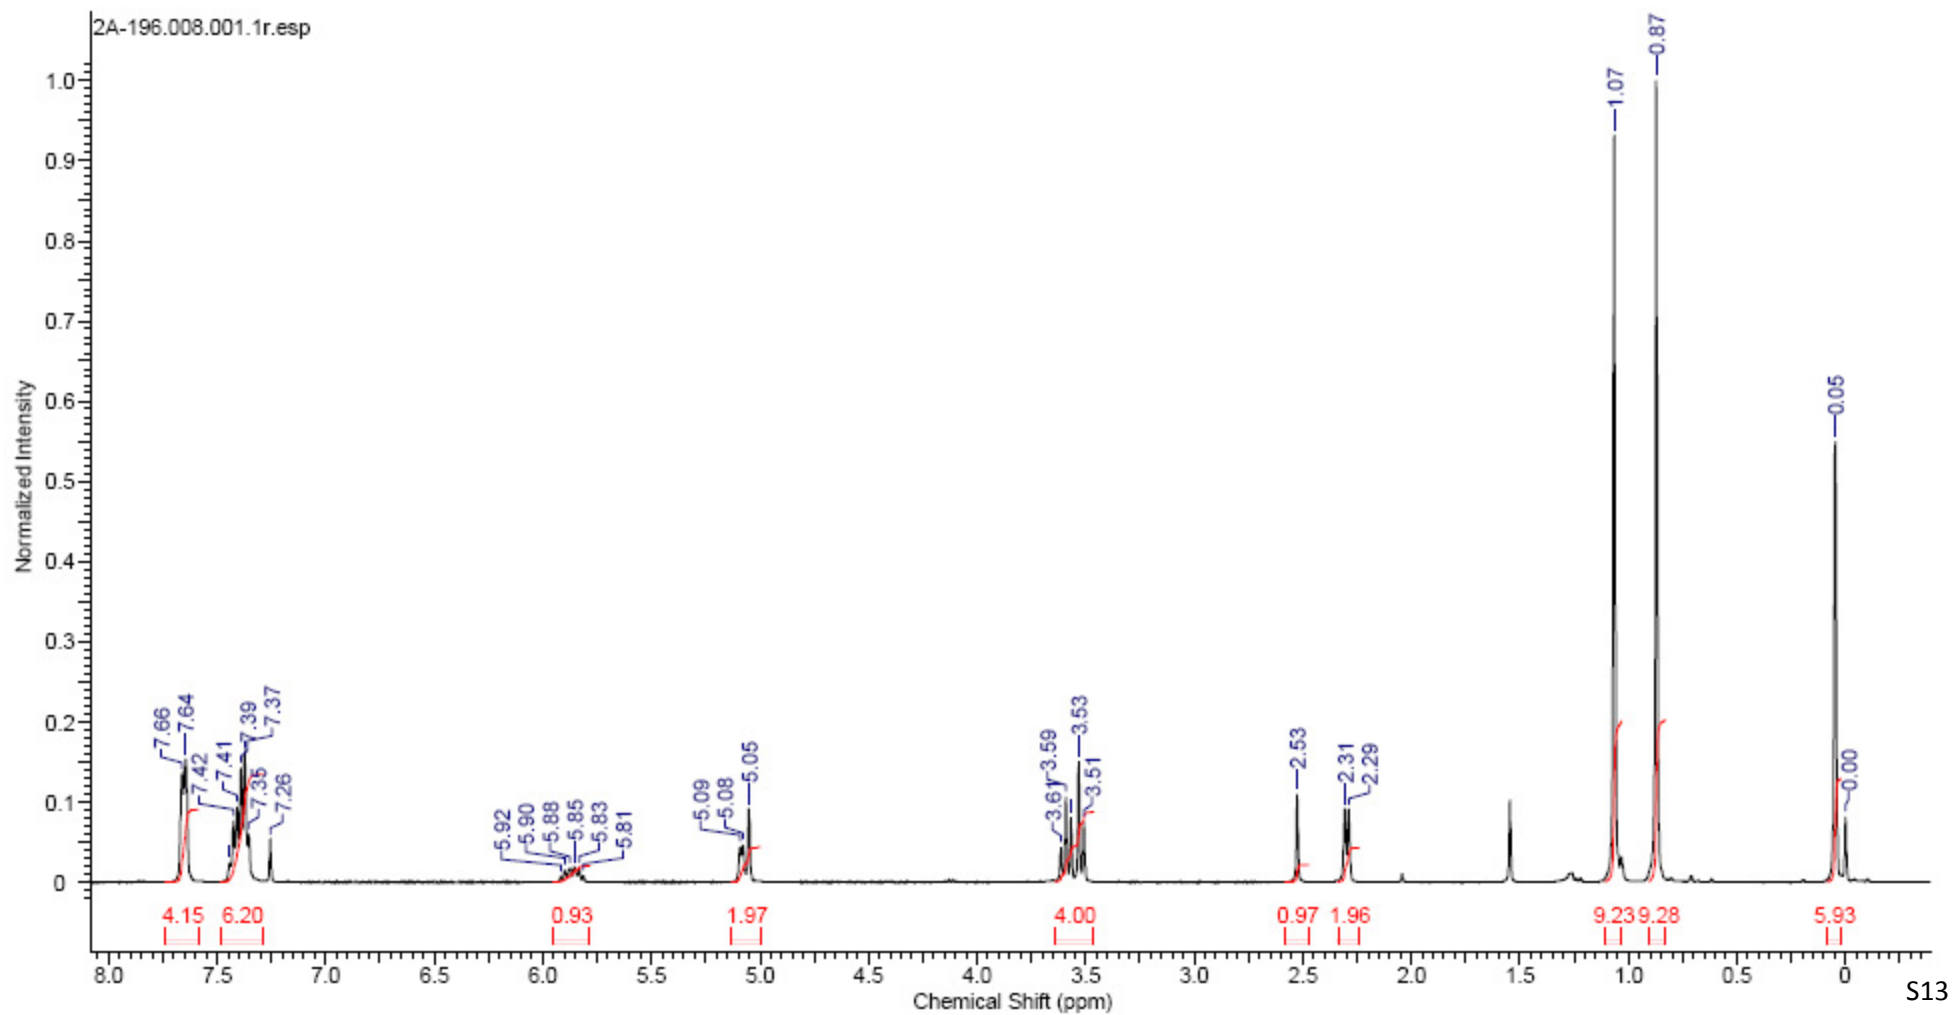

**10**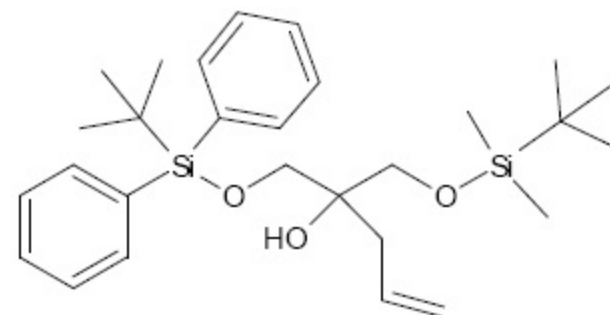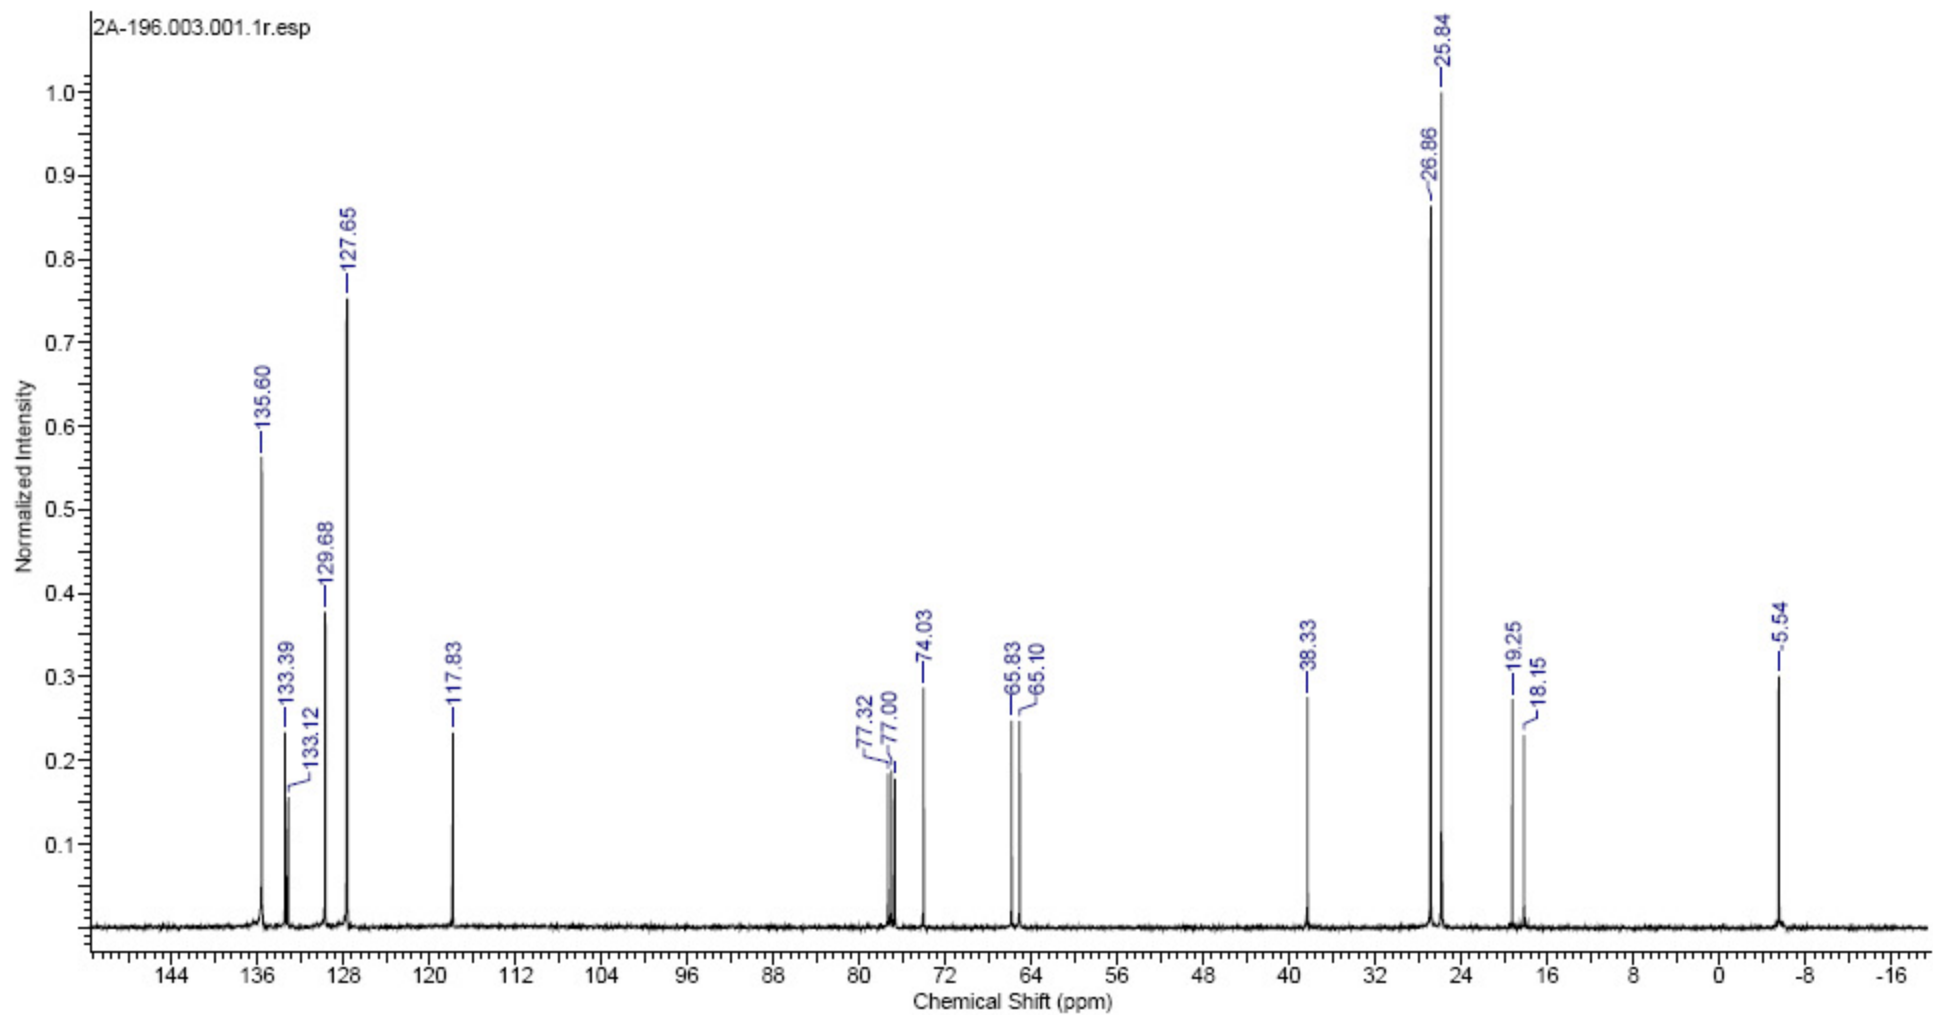

11

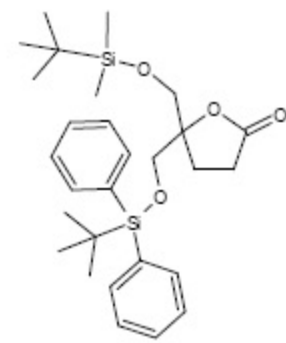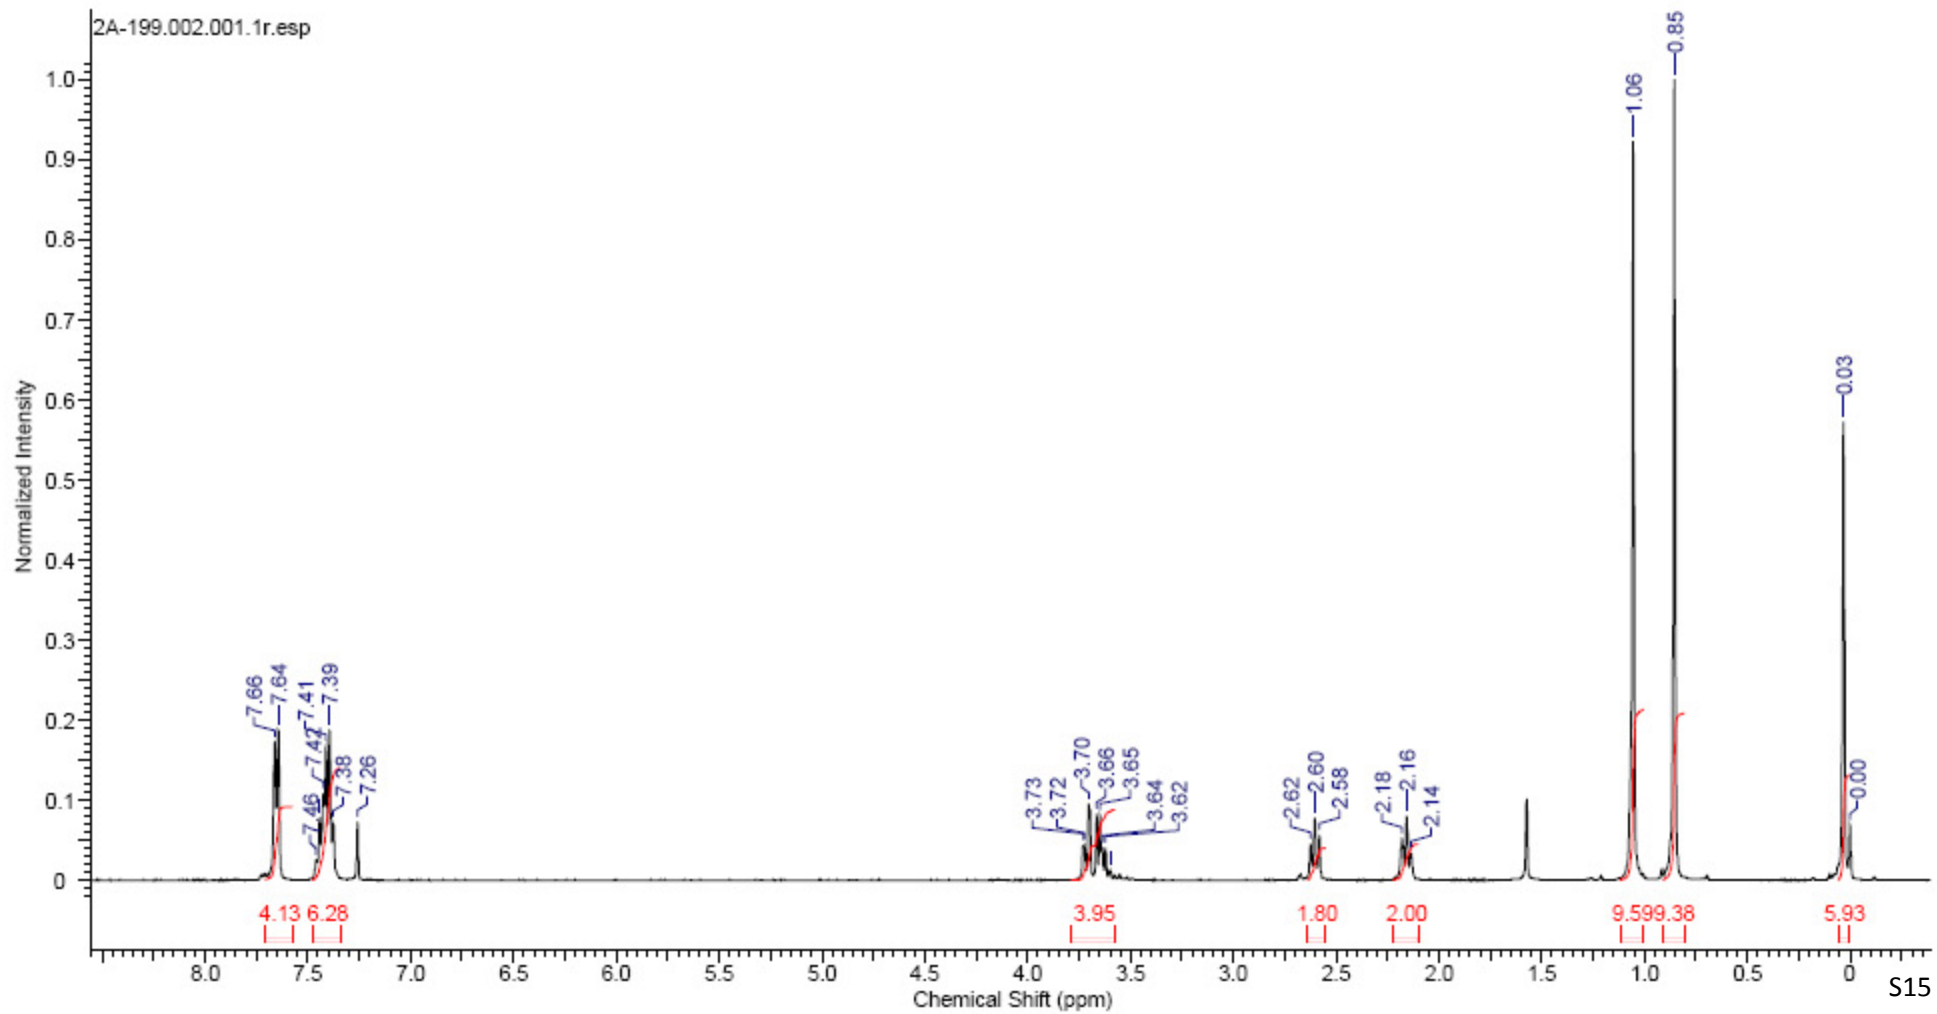

# 11

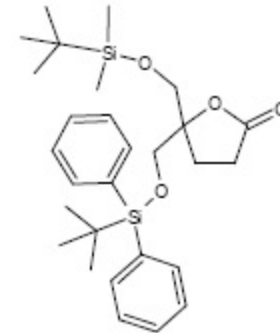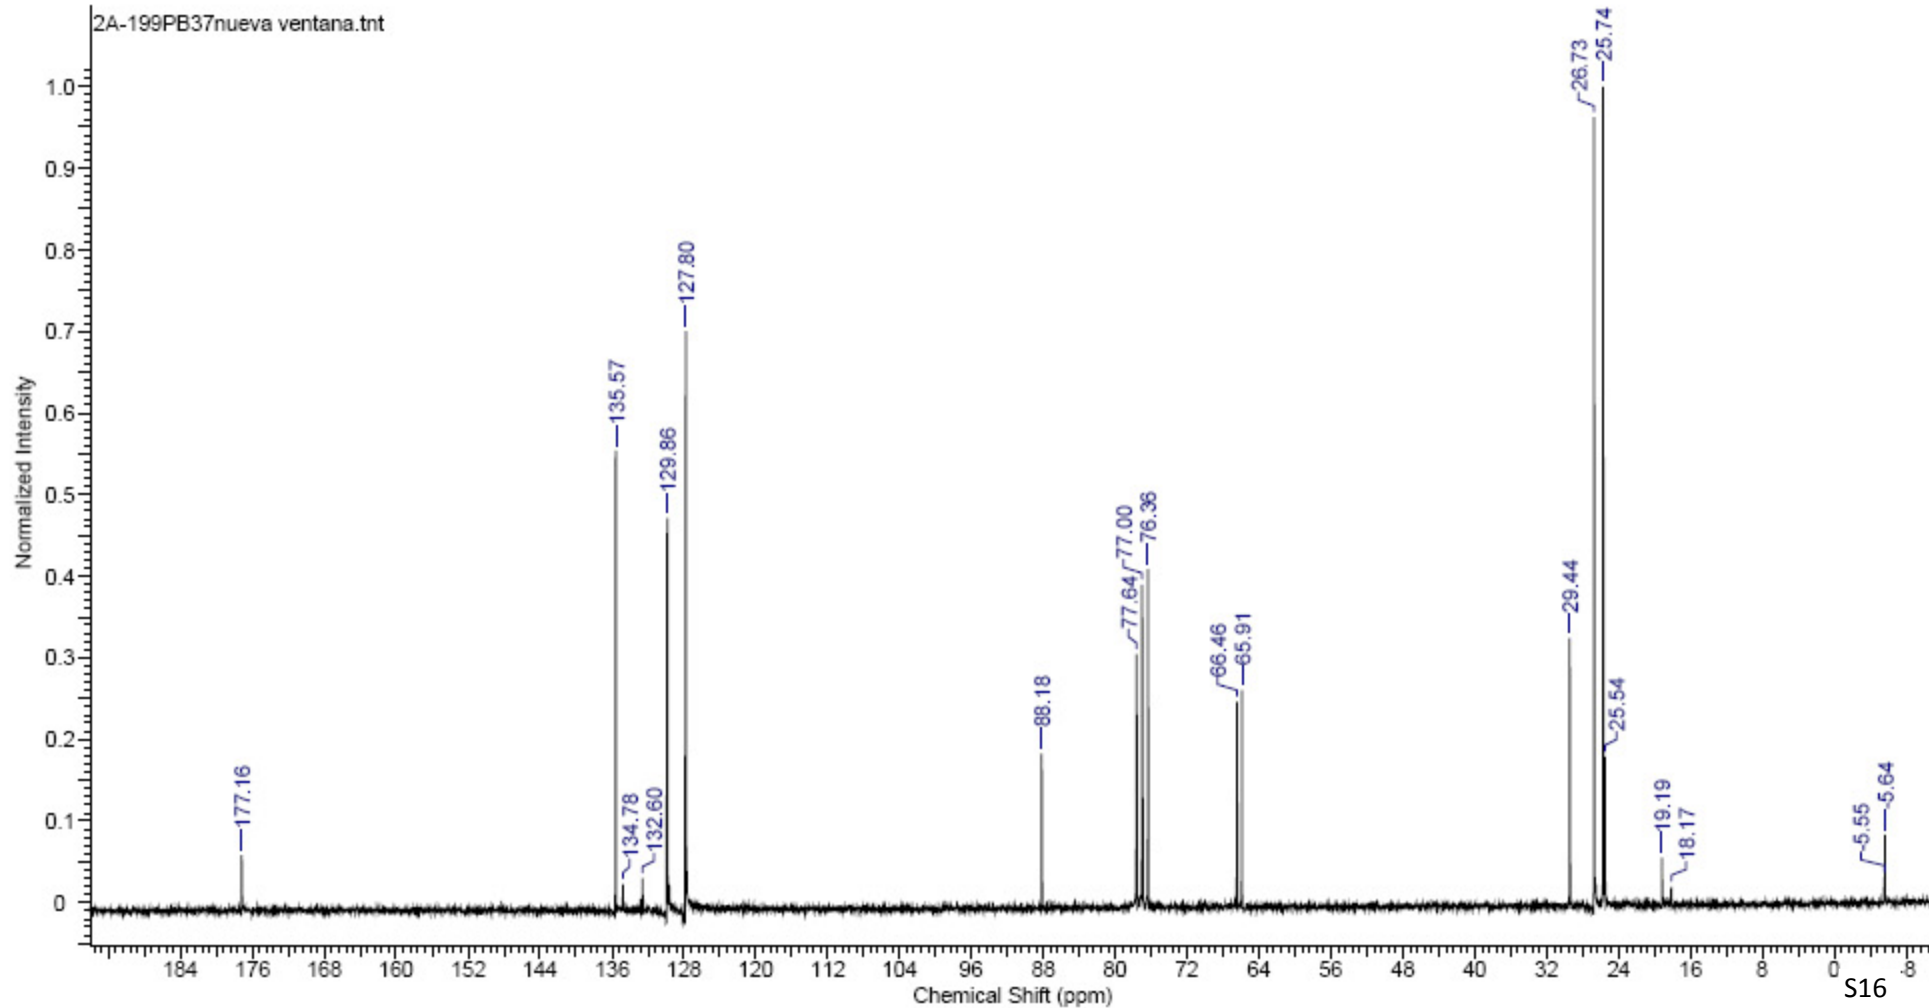



11

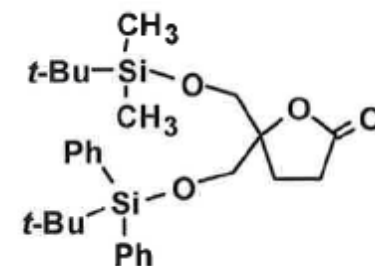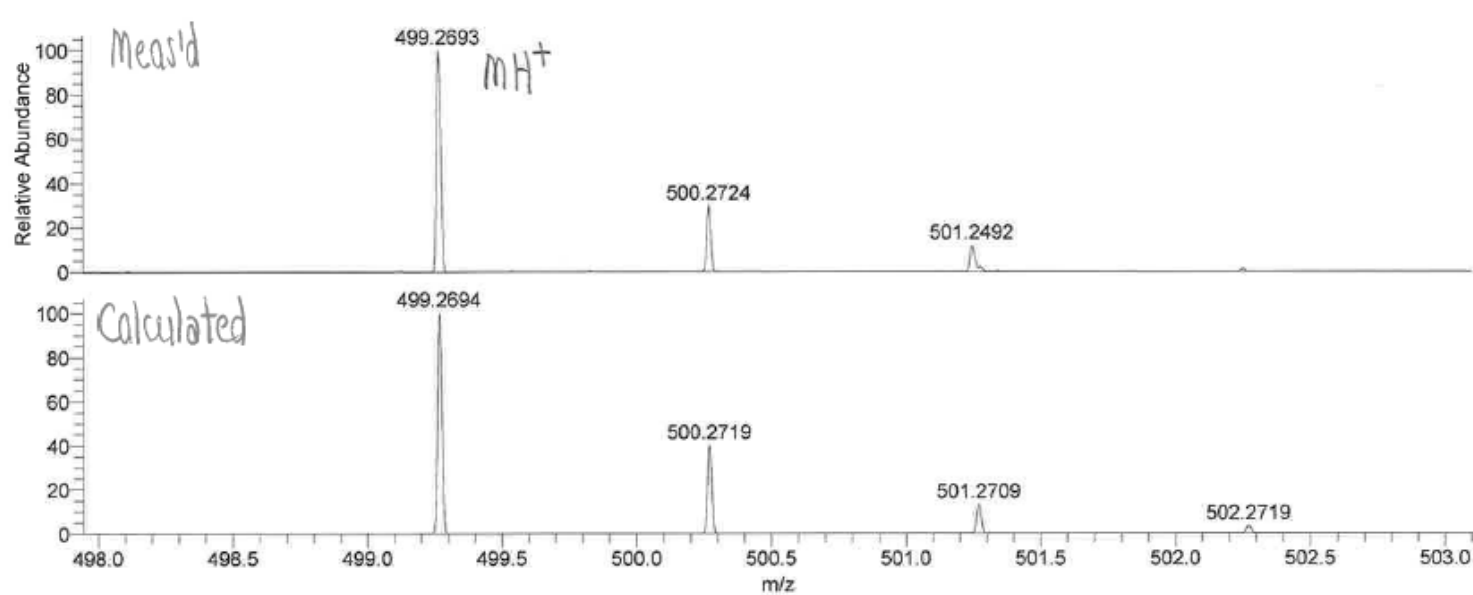

NL:  
3.41E5  
Lactone\_120606131959#32-  
44 RT: 0.26-0.36 AV: 13 F:  
FTMS + p ESI Full ms  
[100.00-1000.00]

NL:  
1.46E4  
 $C_{28}H_{42}O_4Si_2 + H$   
 $C_{28}H_{43}O_4Si_2$   
p (gss, s /p:40) Chrg 1  
R: 30000 Res. Pwr. @FWHM

Page 818 27 Apr 2012 15:57:38

ANALIZADOR ELEMENTAL EXETER CE 440

ANÁLISIS NRO.: 5754

MUESTRA: 2A-199PB37

Código: U12-042306

Fórmula Empírica:  $C_{28}H_{42}O_4Si_2$

Calculado: %C 67.422 %H 8.487 %N .000

RESULTADOS

Masa de muestra: 1618.ug

%C: 67.48

%H: 8.30

%N: --

Page 819 27 Apr 2012 16:06:24

ANALIZADOR ELEMENTAL EXETER CE 440

ANÁLISIS NRO.: 5756

MUESTRA: 2A-199PB37

Código: U12-042306 (Duplicado)

Fórmula Empírica:  $C_{28}H_{42}O_4Si_2$

Calculado: %C 67.422 %H 8.487 %N .000

RESULTADOS

Masa de muestra: 1864.ug

%C: 67.81

%H: 8.45

%N: --

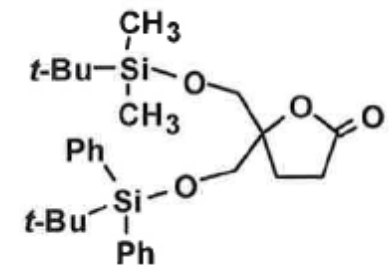

# 12a

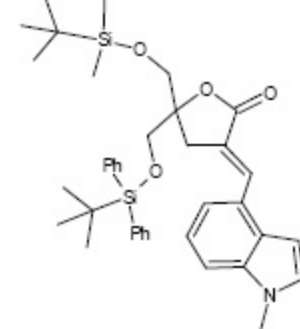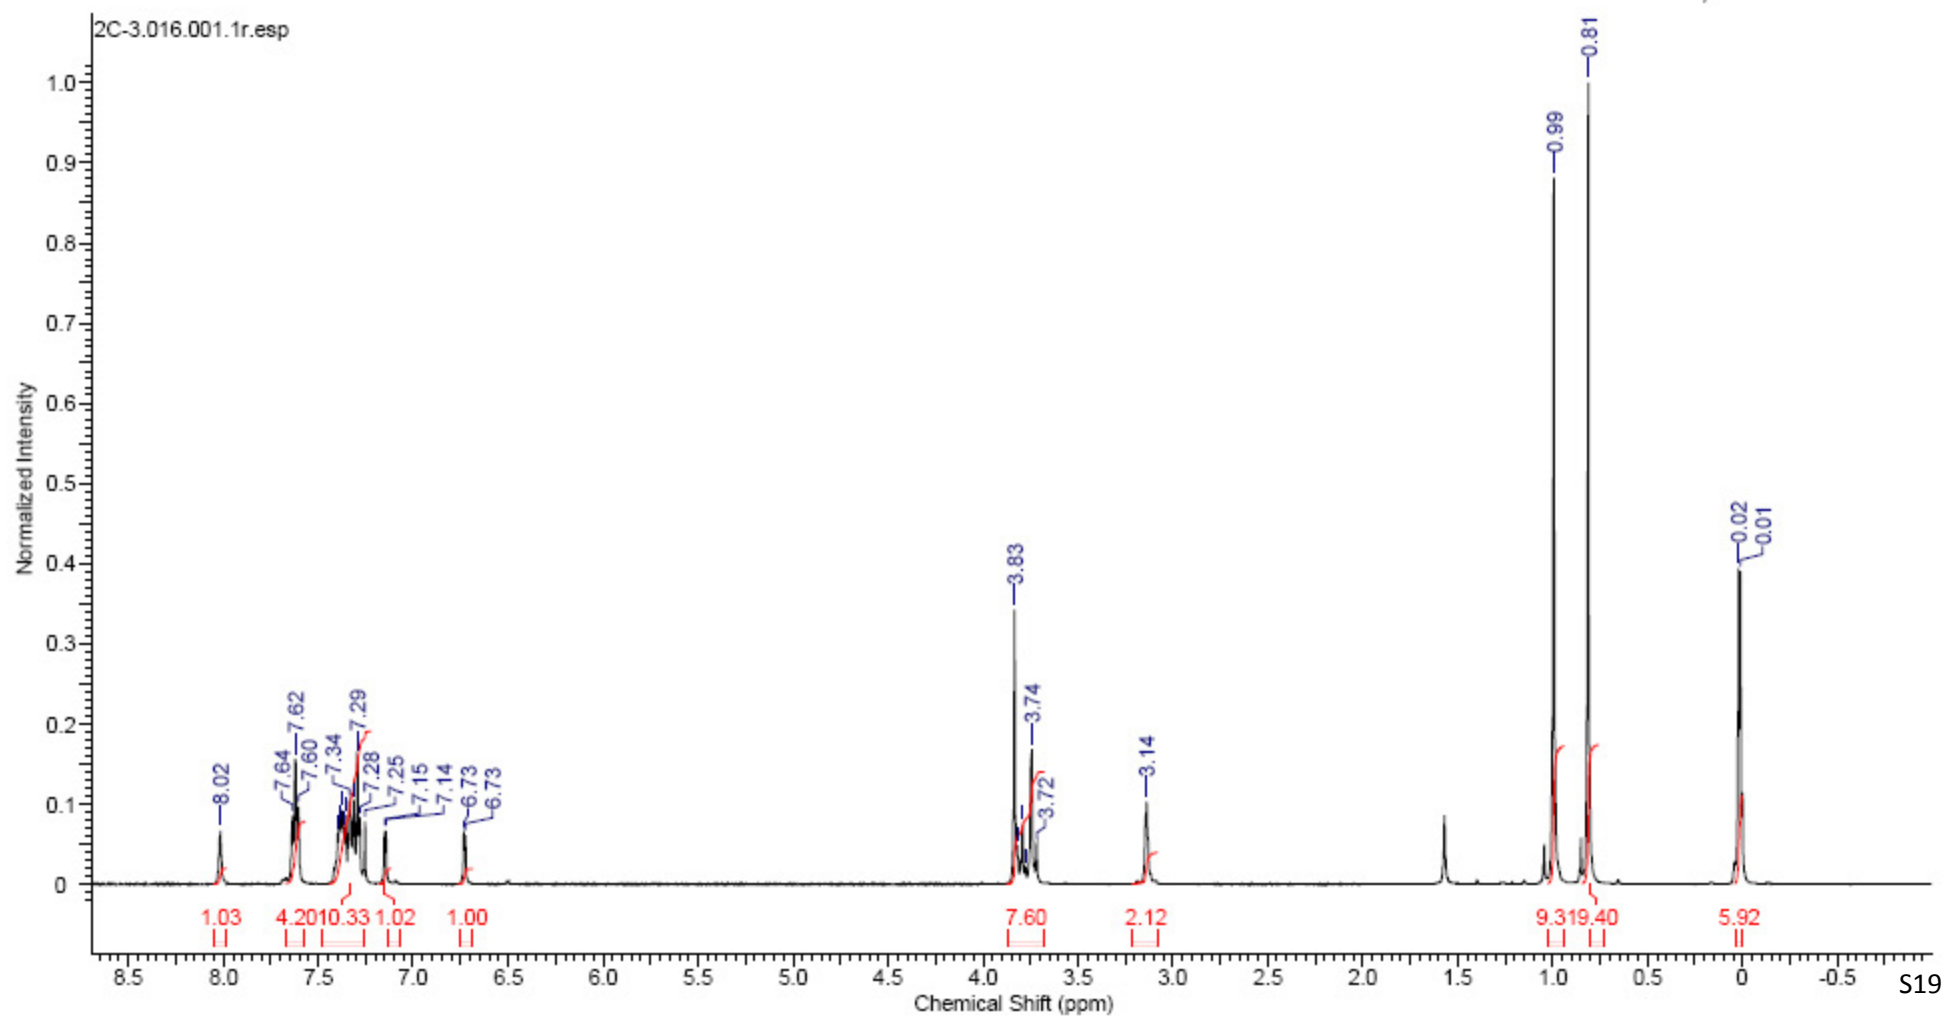

# 12a

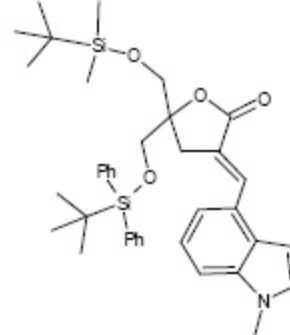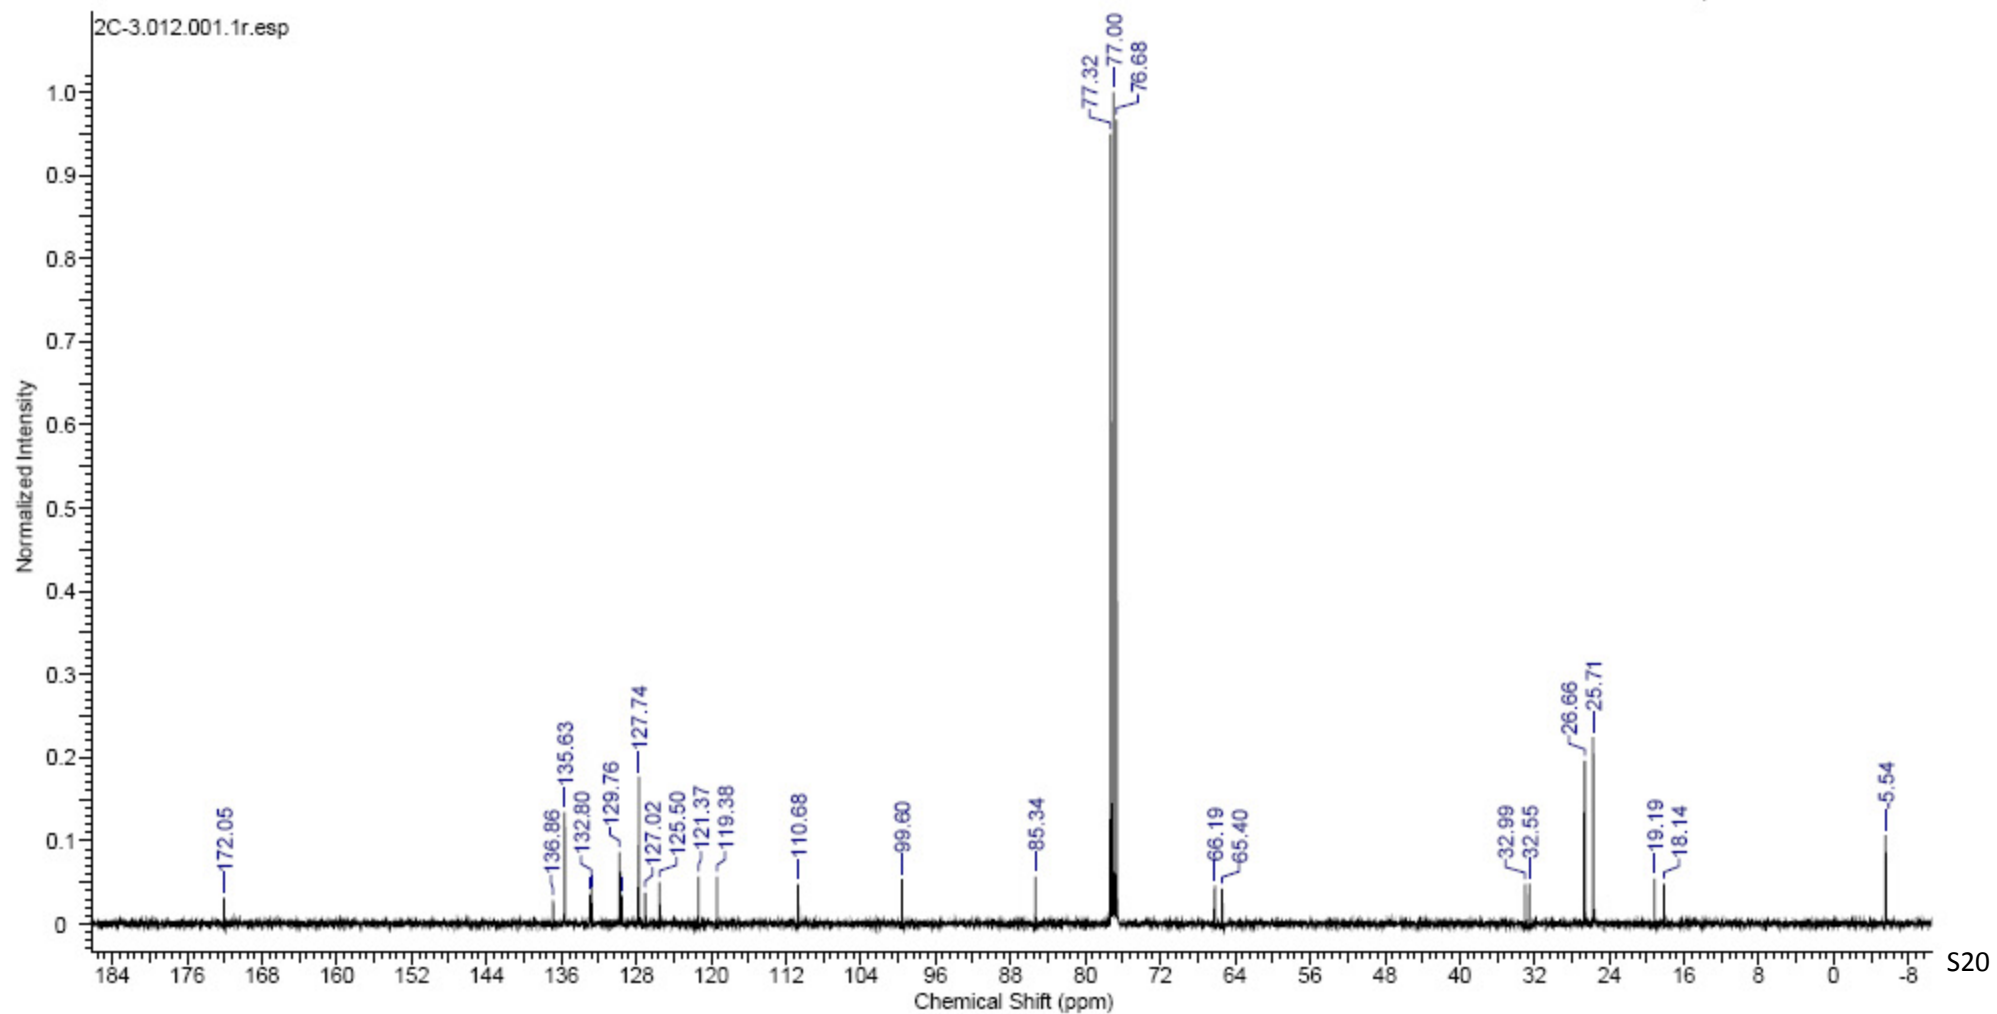

# 12b

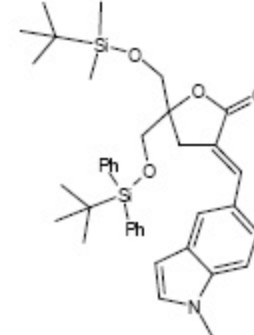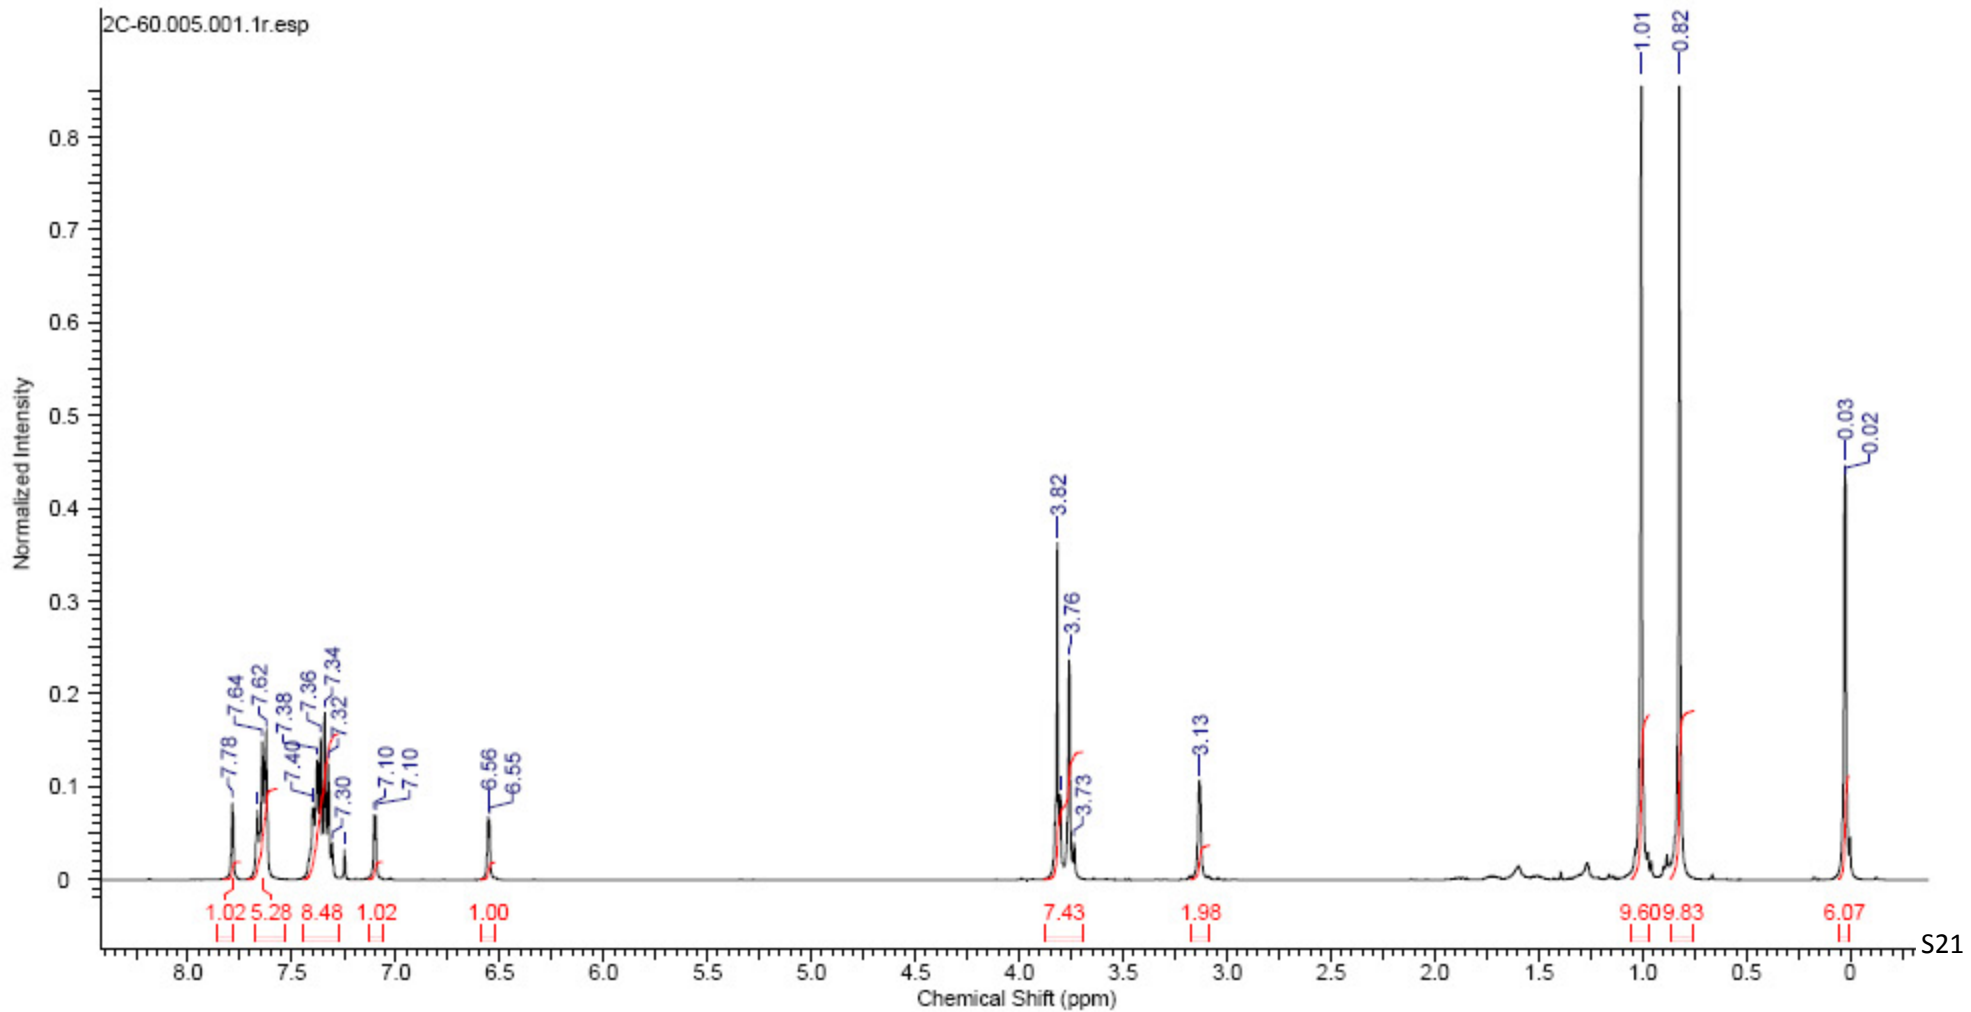

# 12b

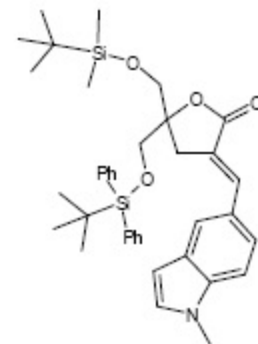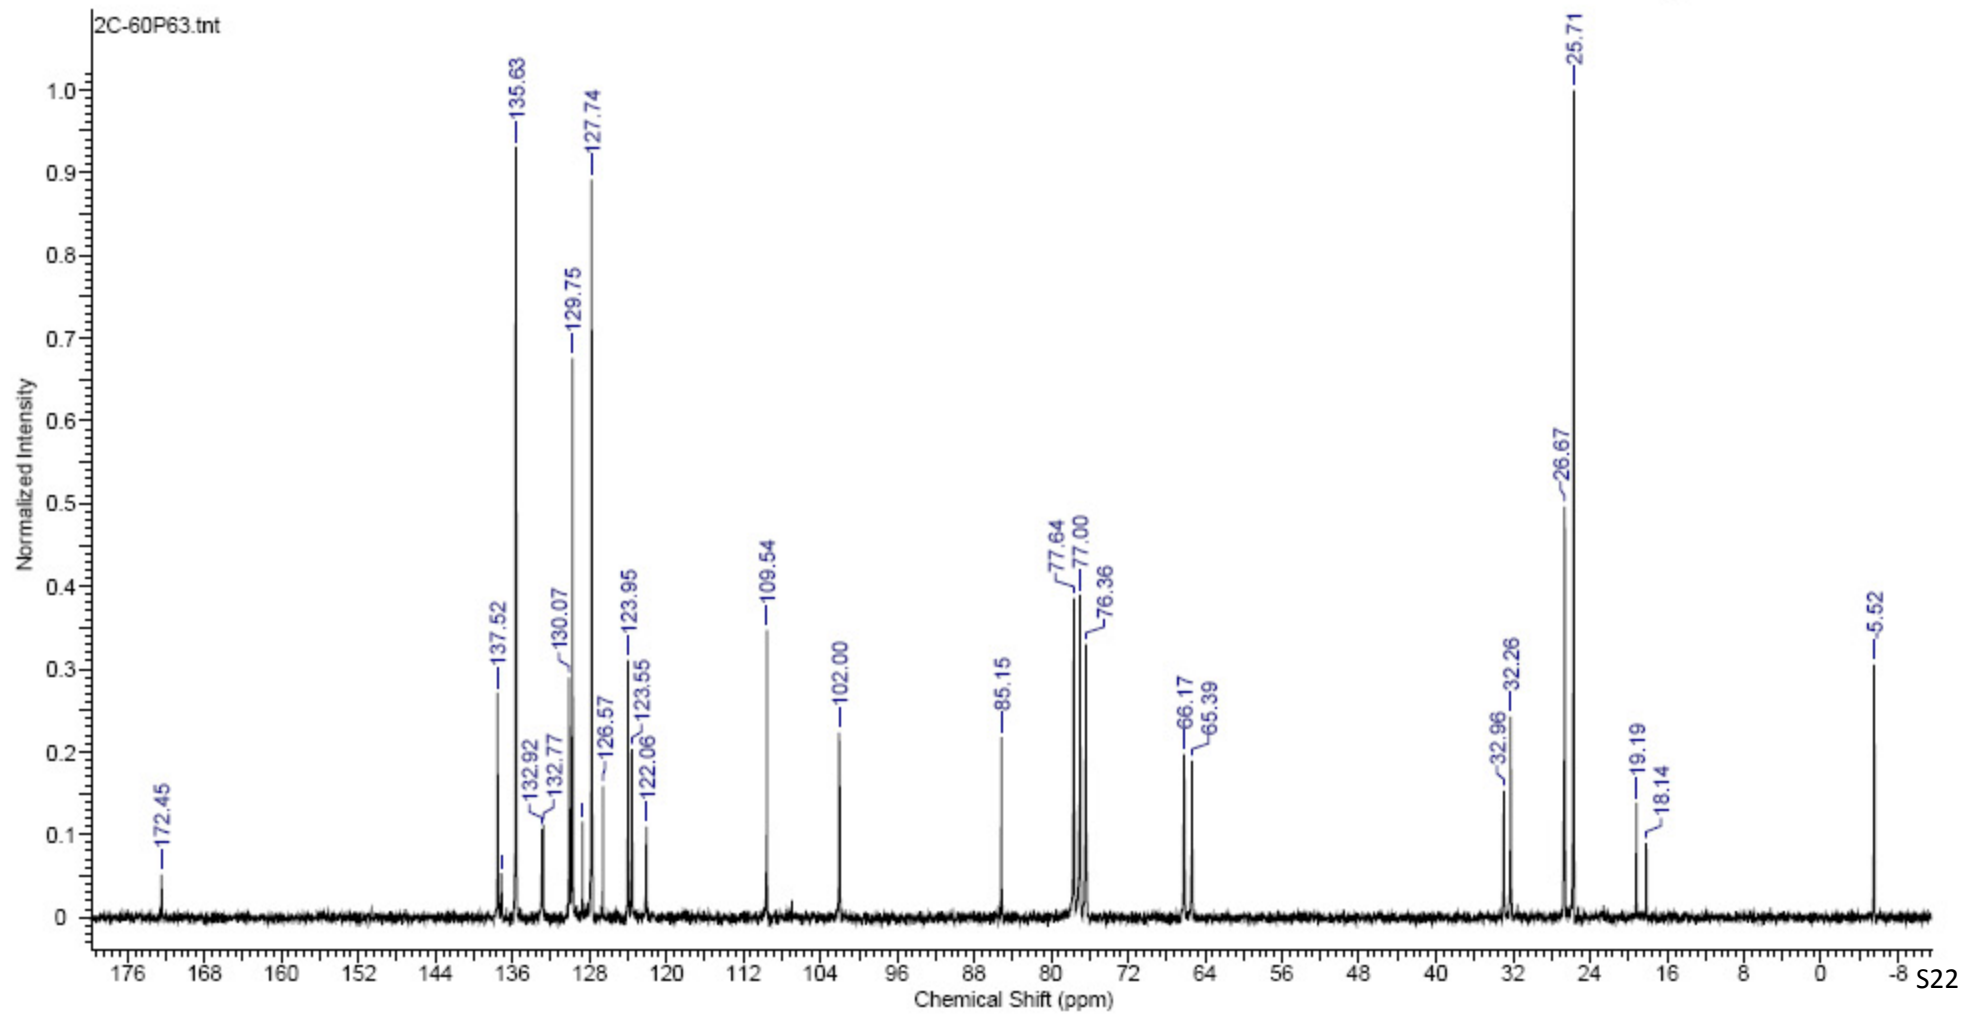

# 12c

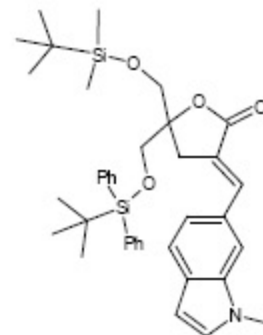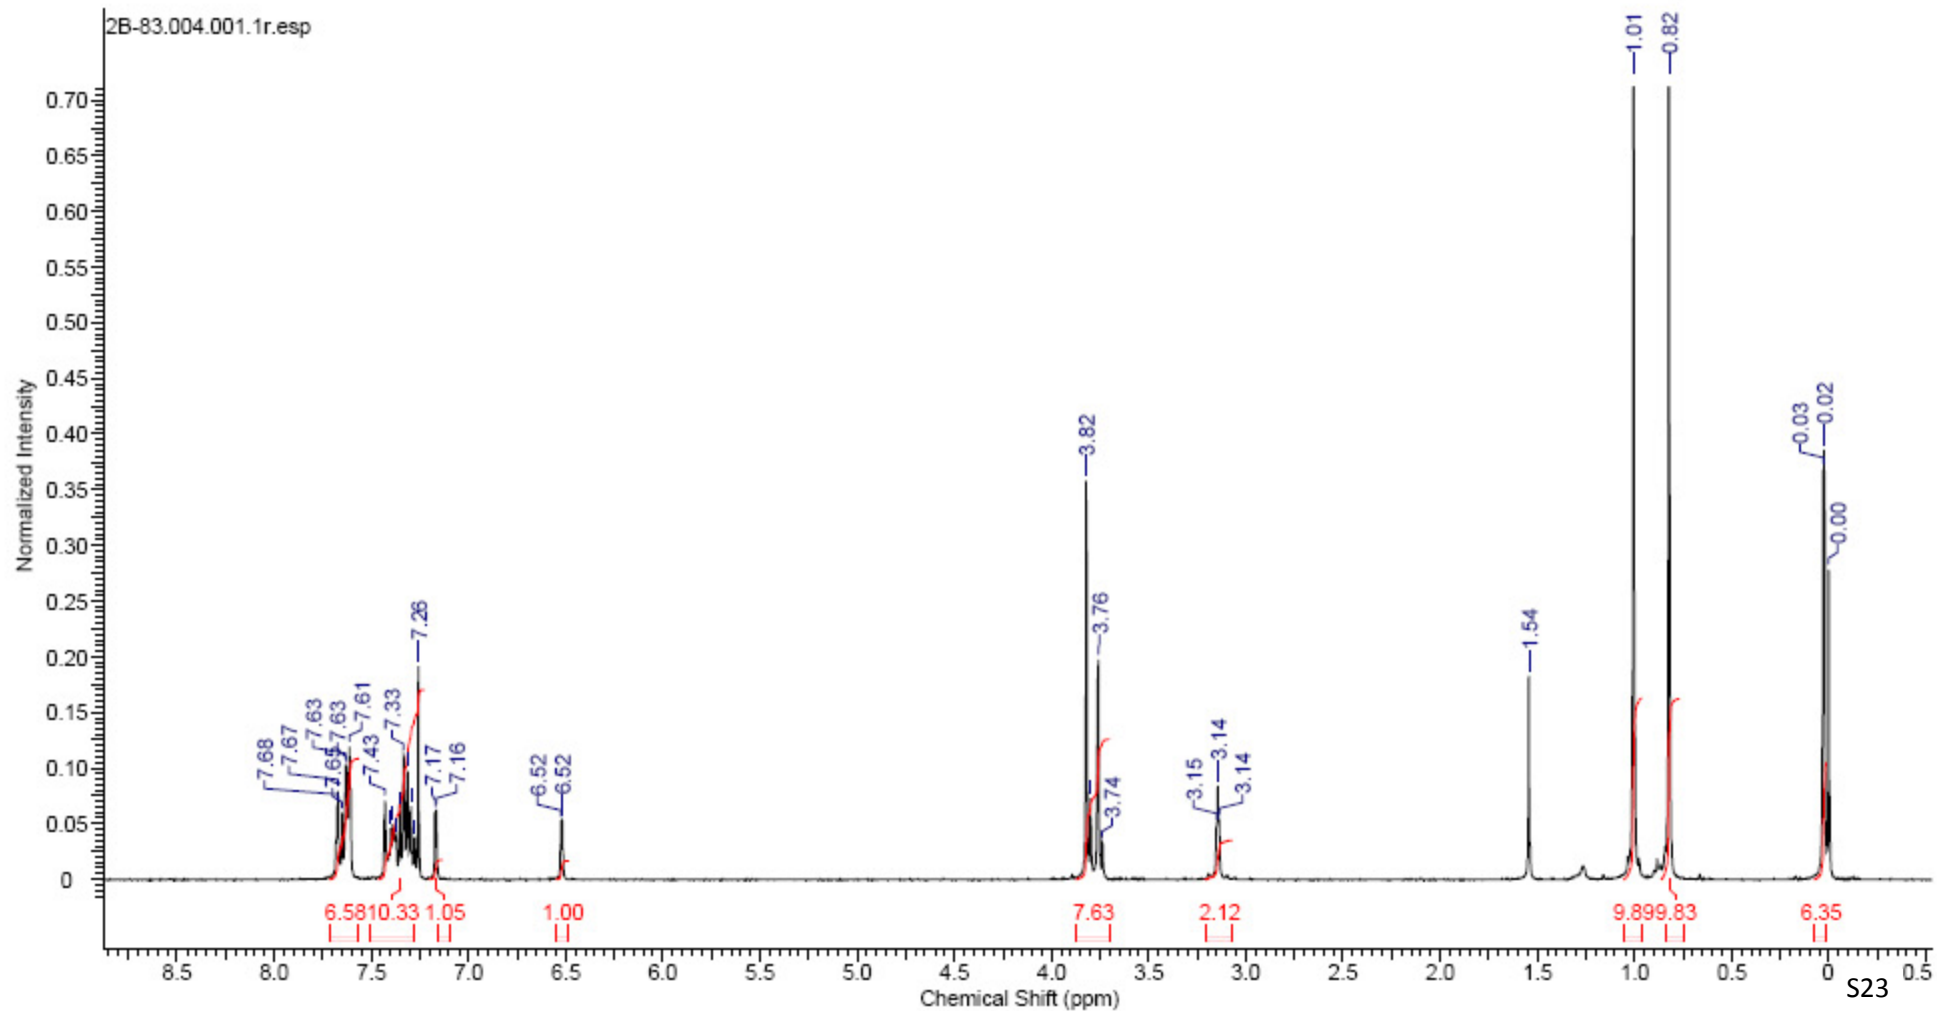

# 12c

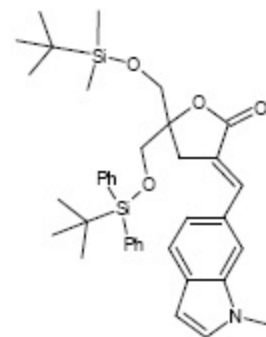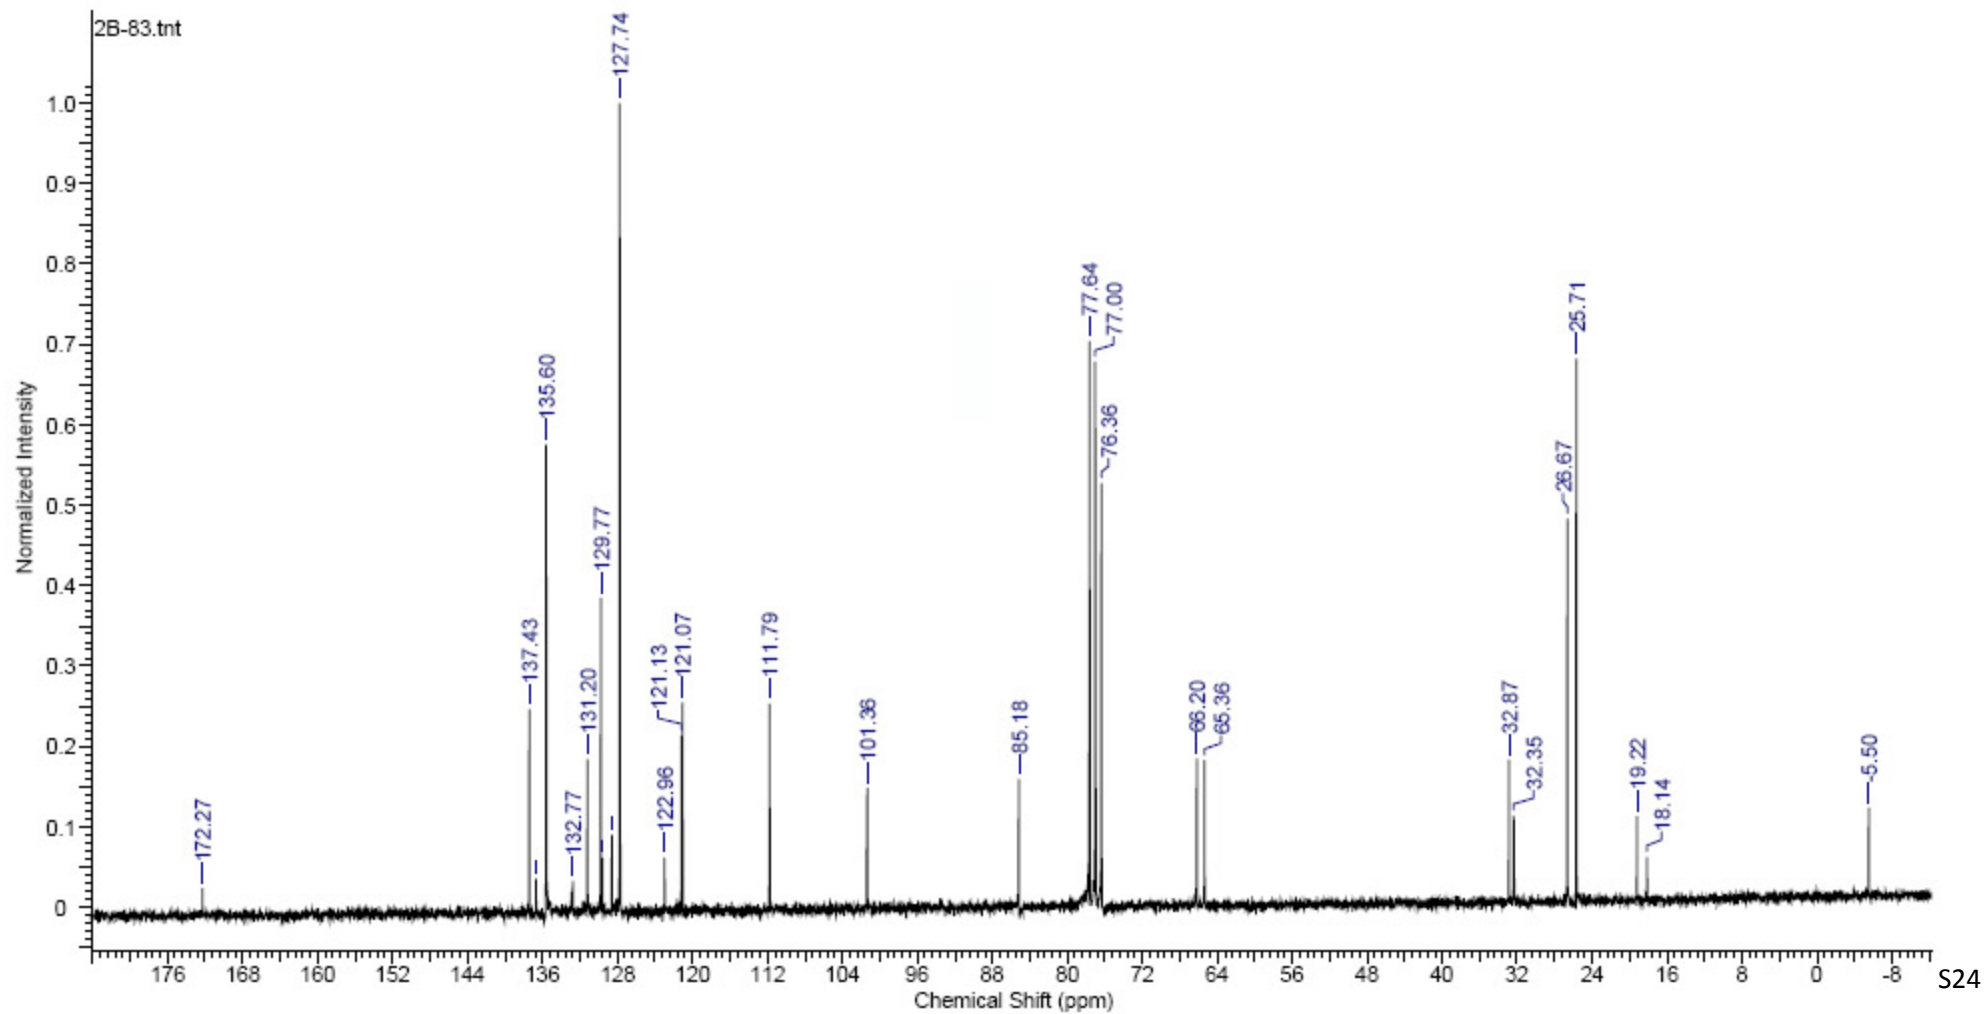



# 12d

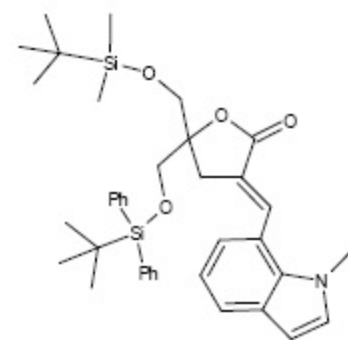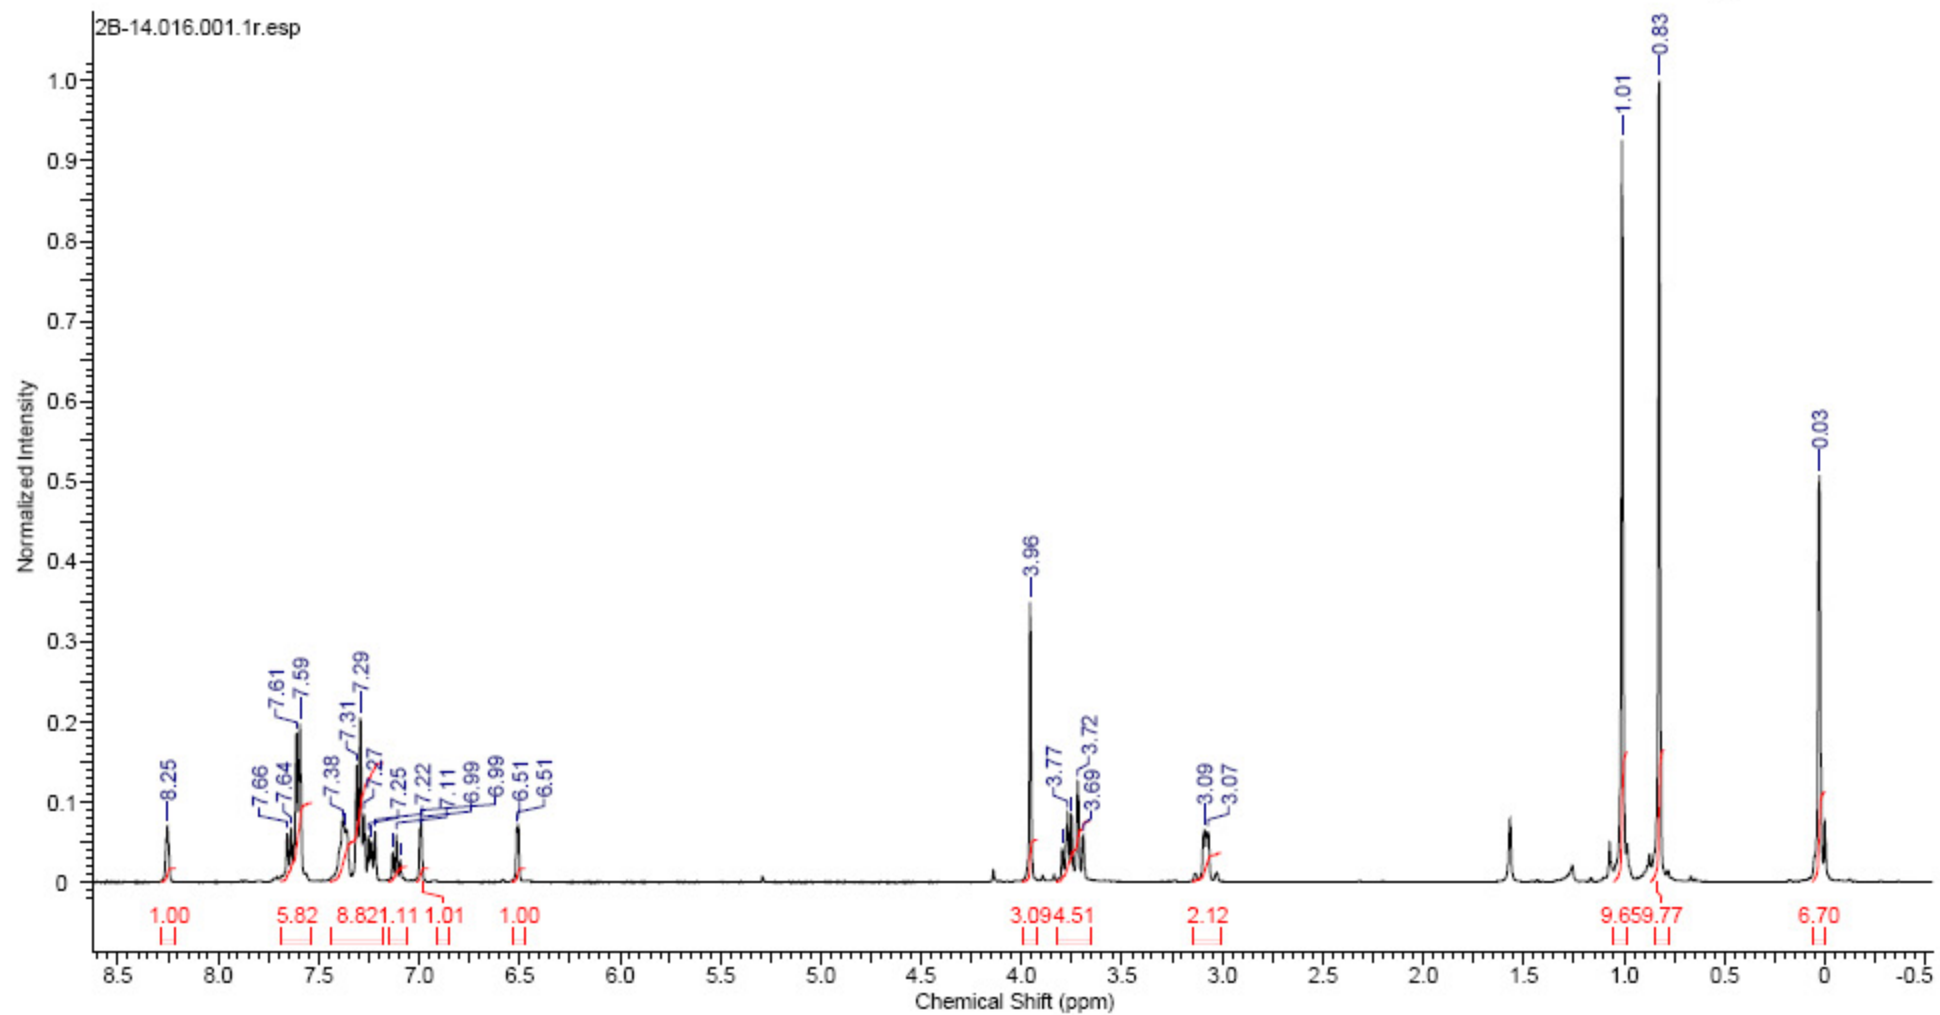

# 12d

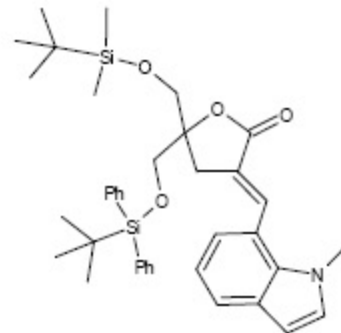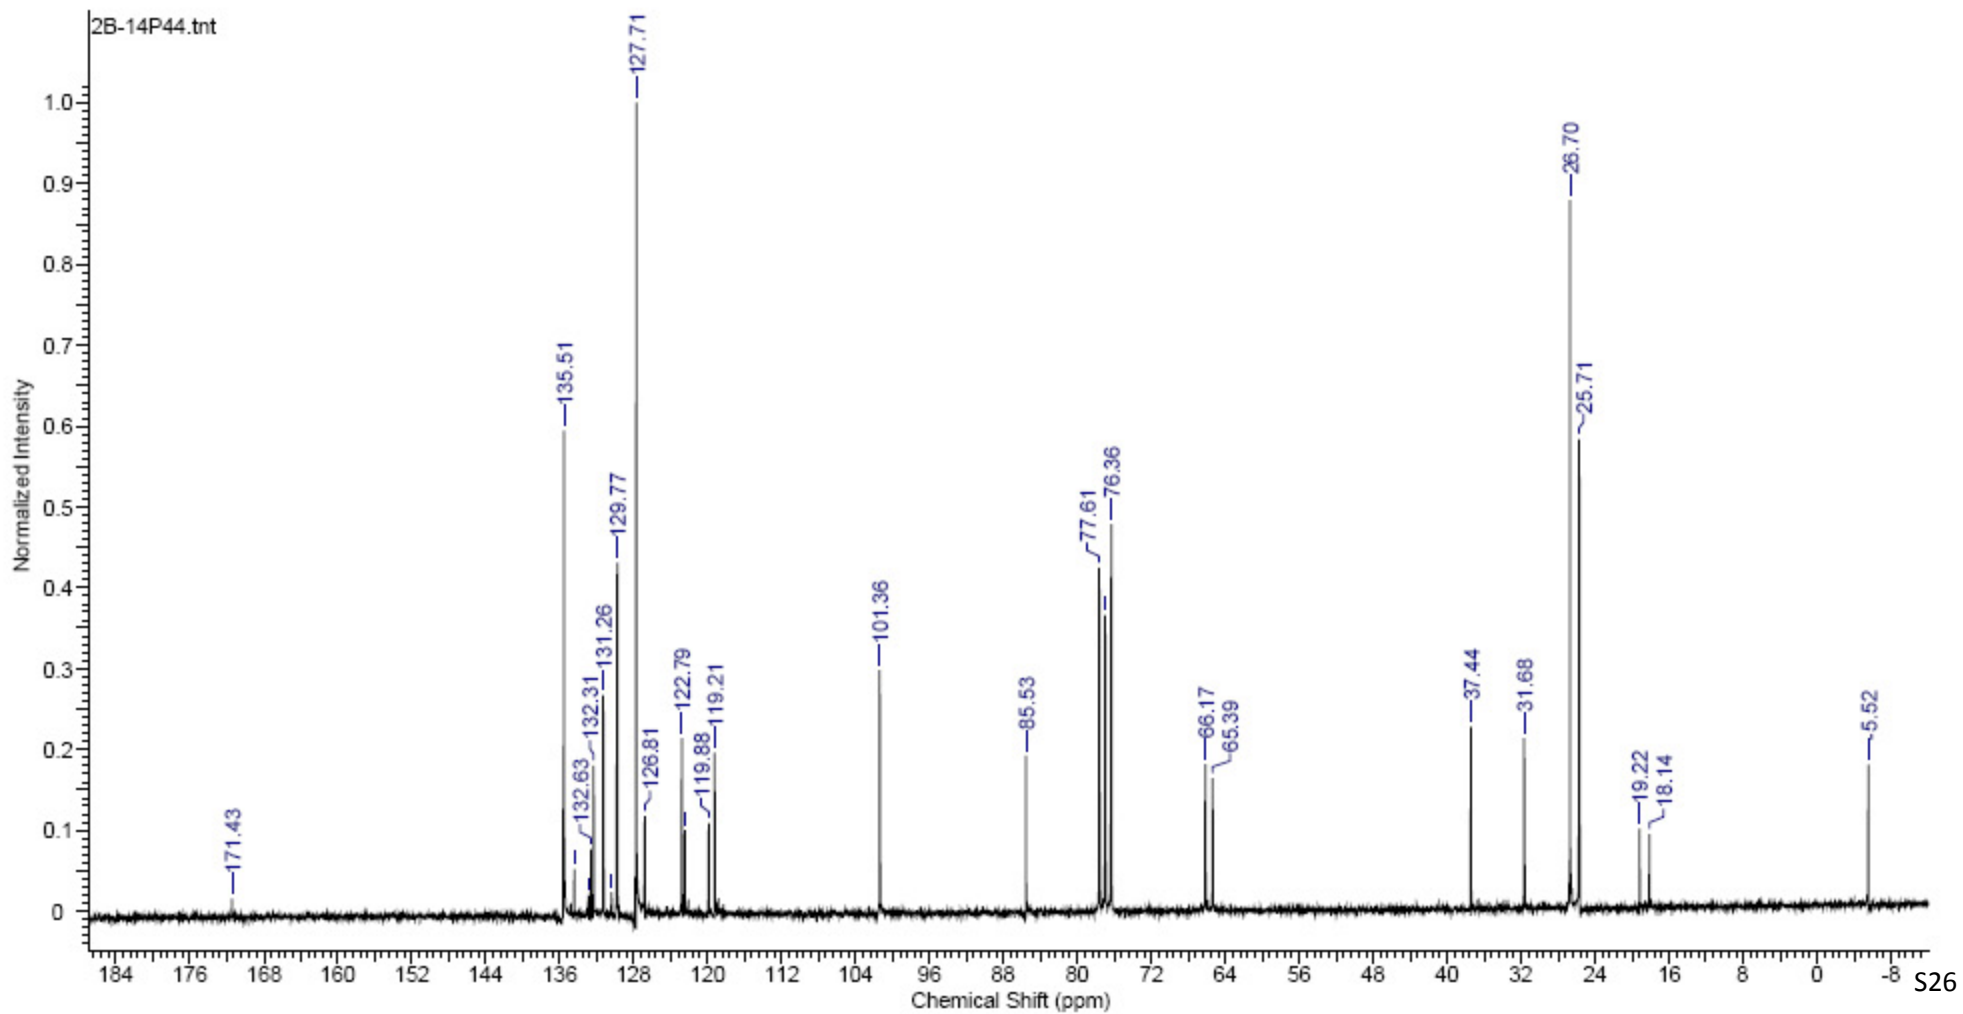

# 13a

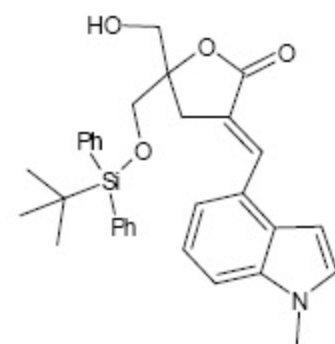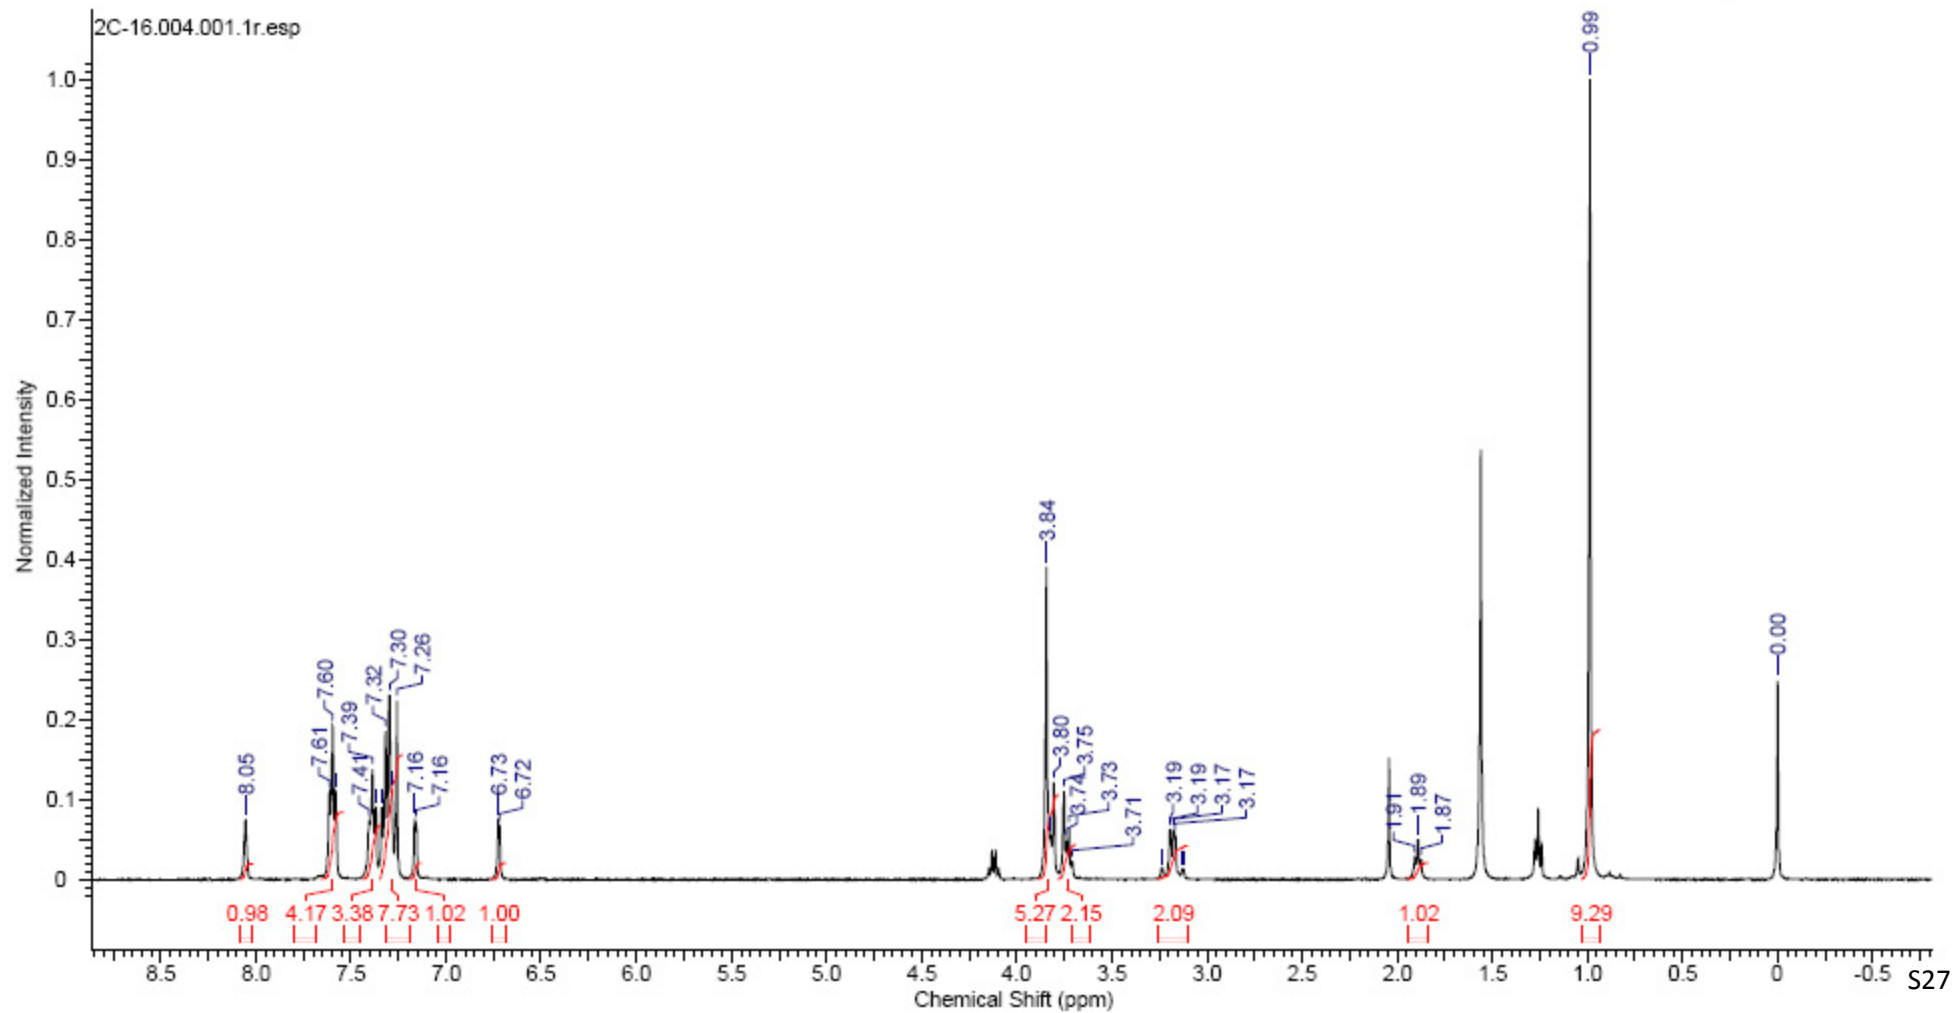

# 13a

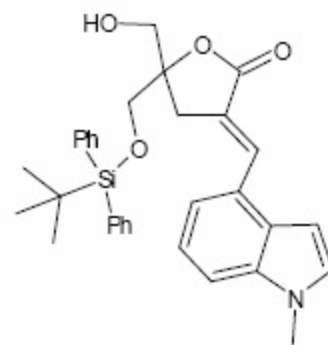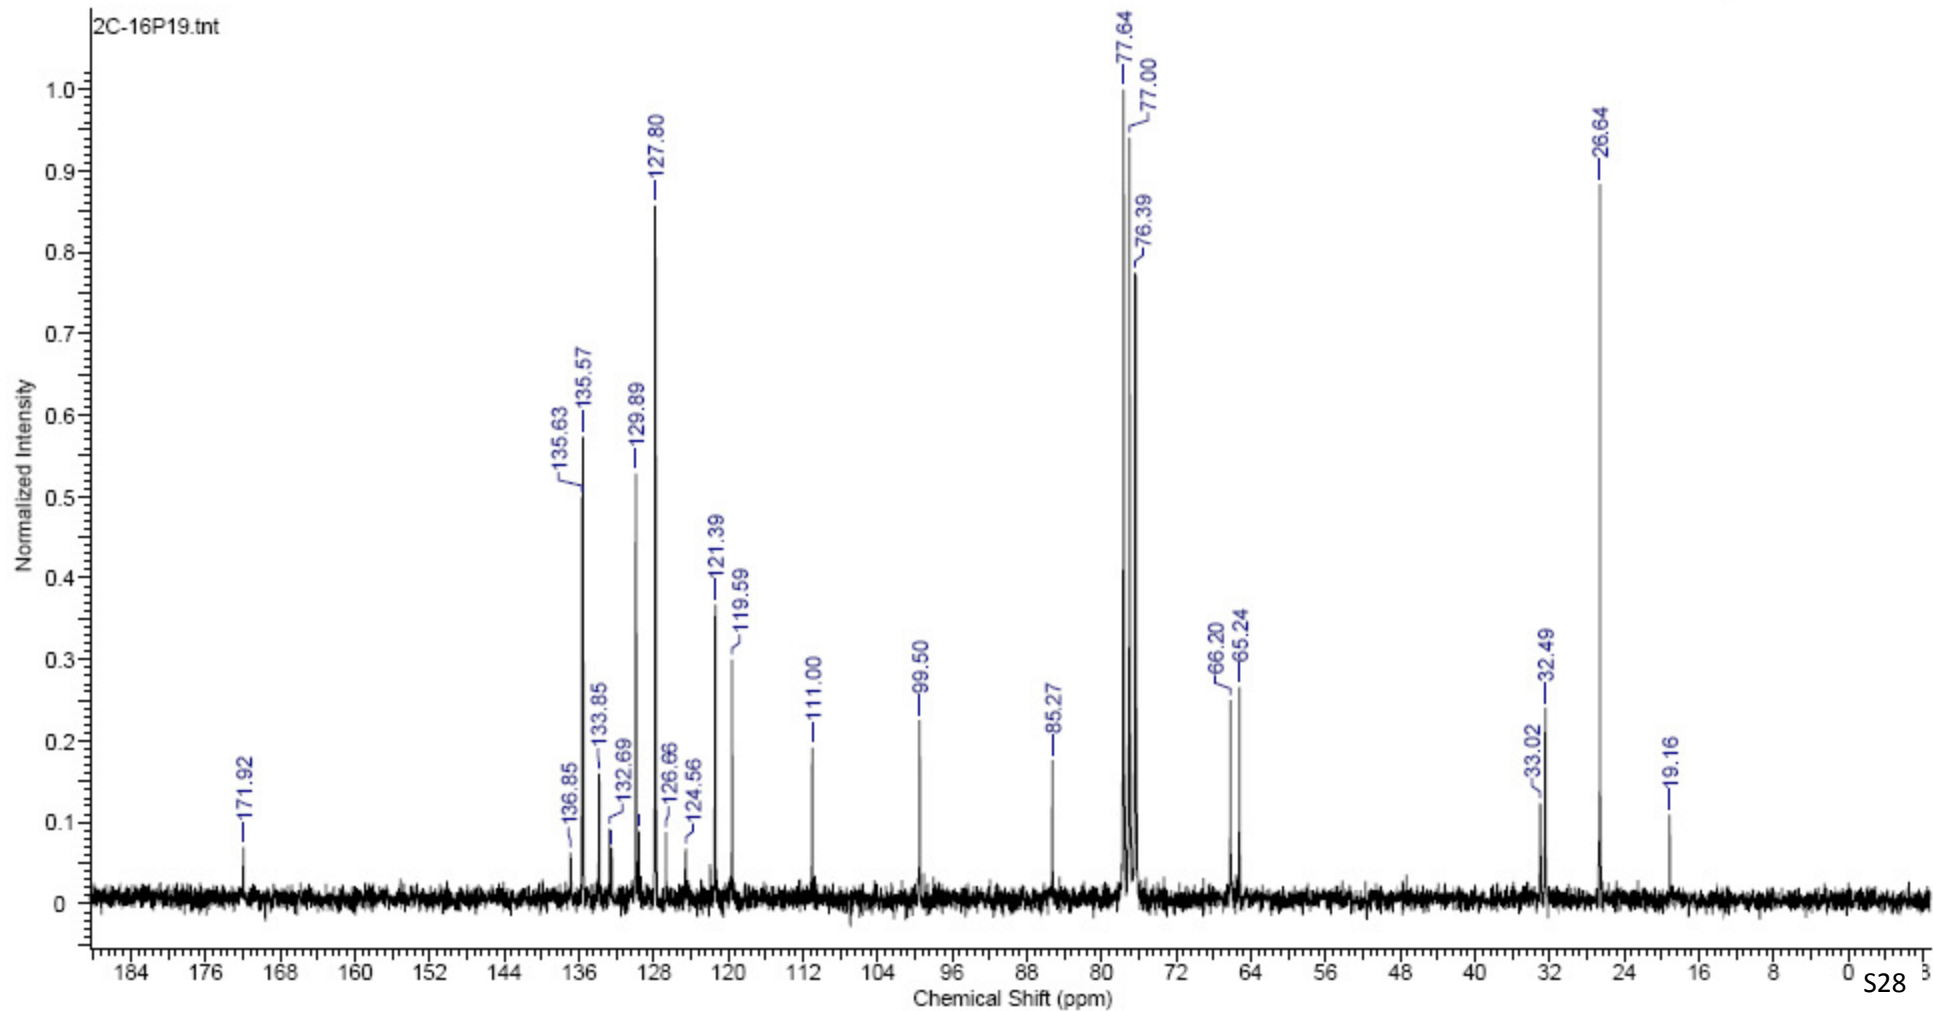

# 13b

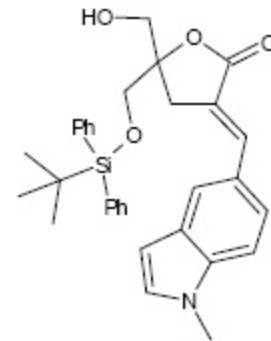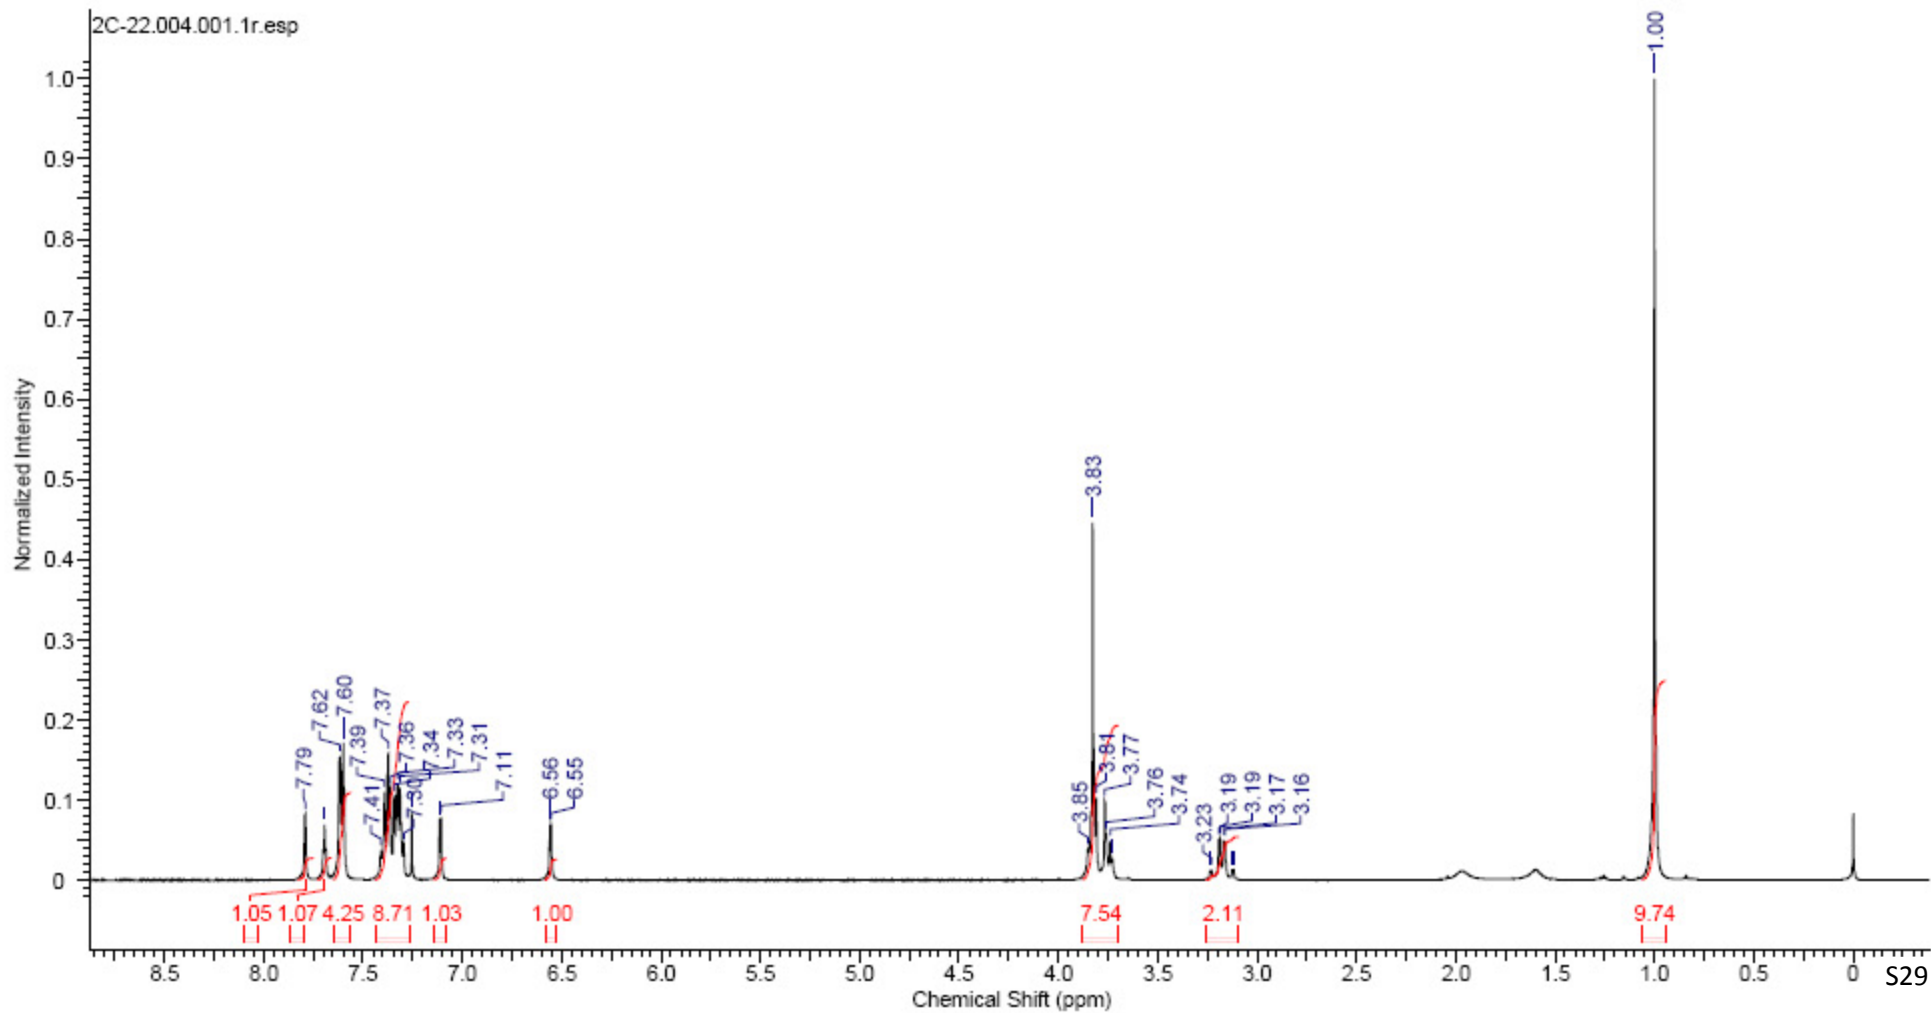

# 13b

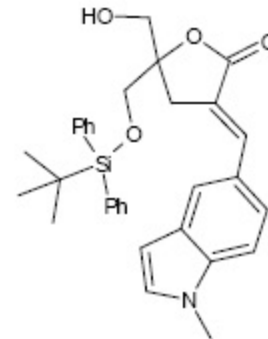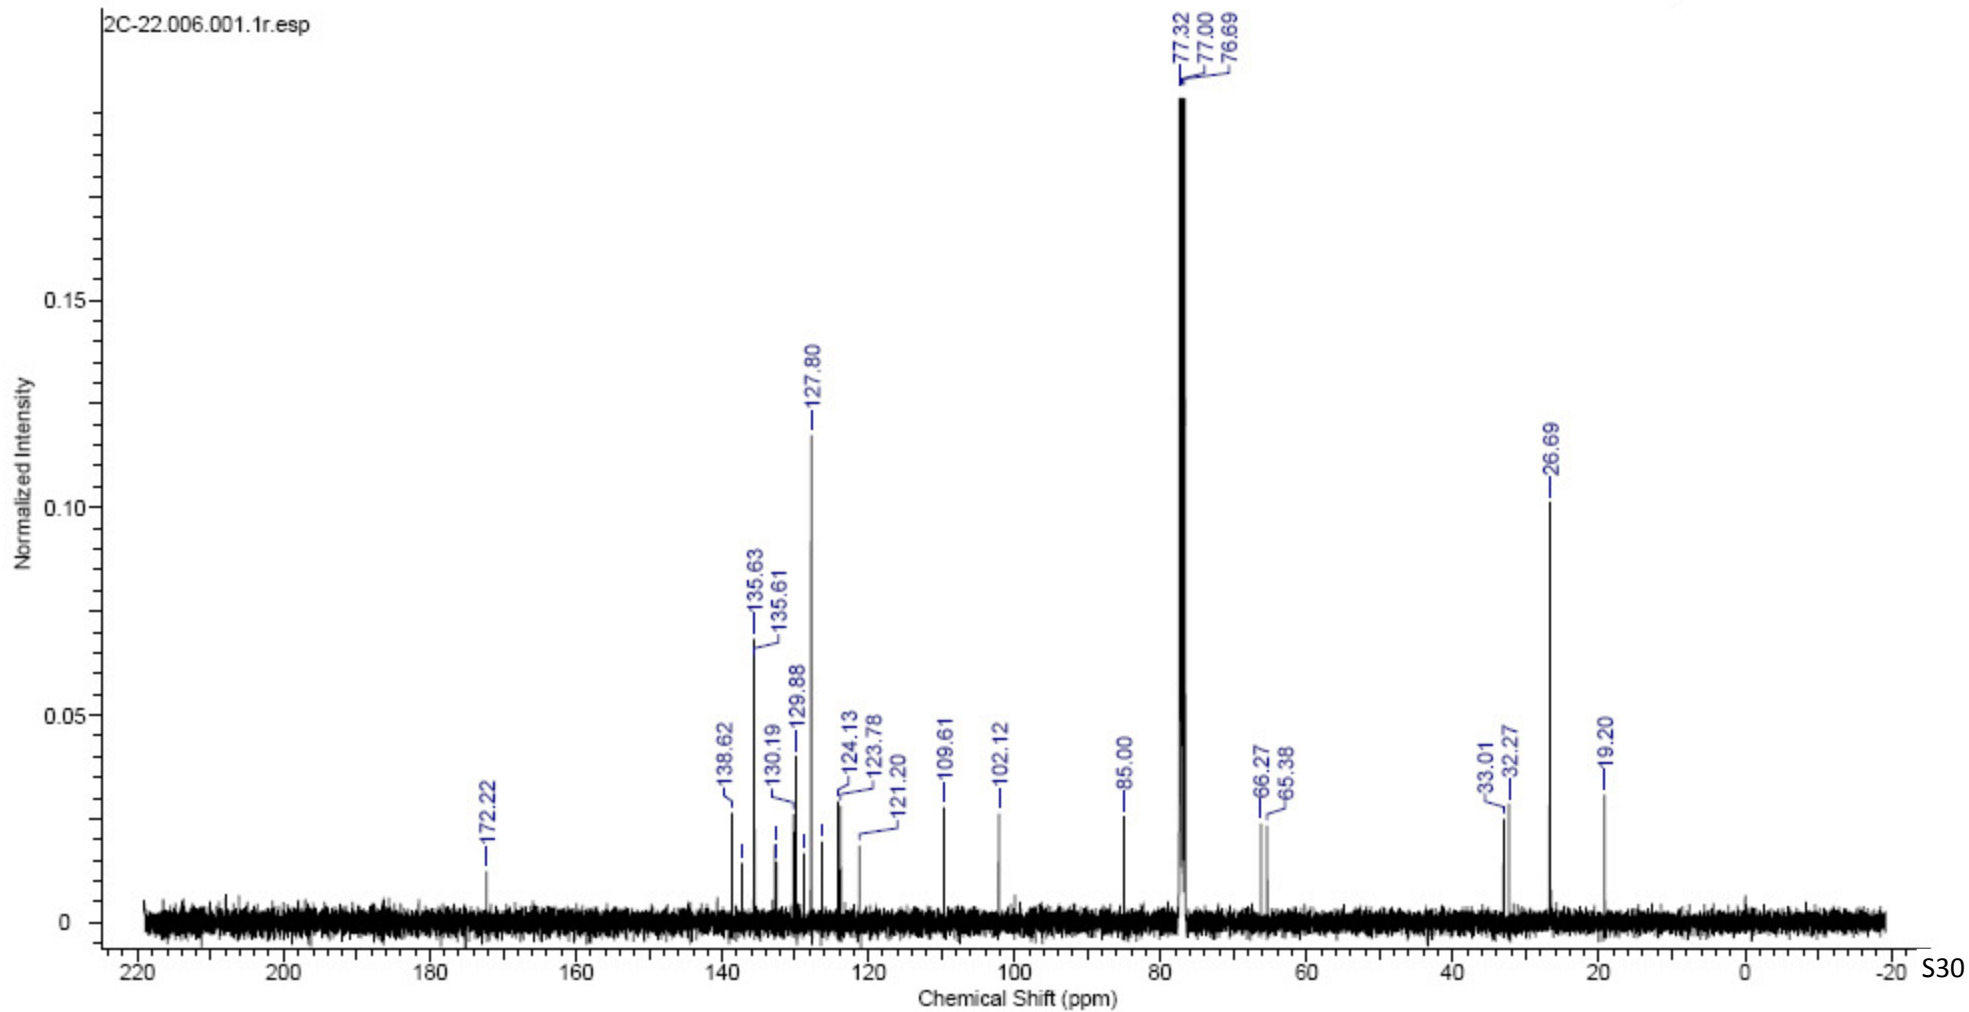

# 13c

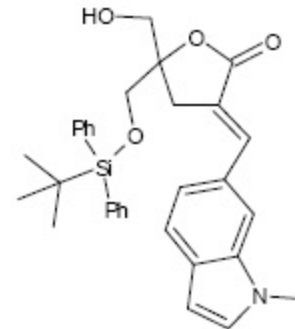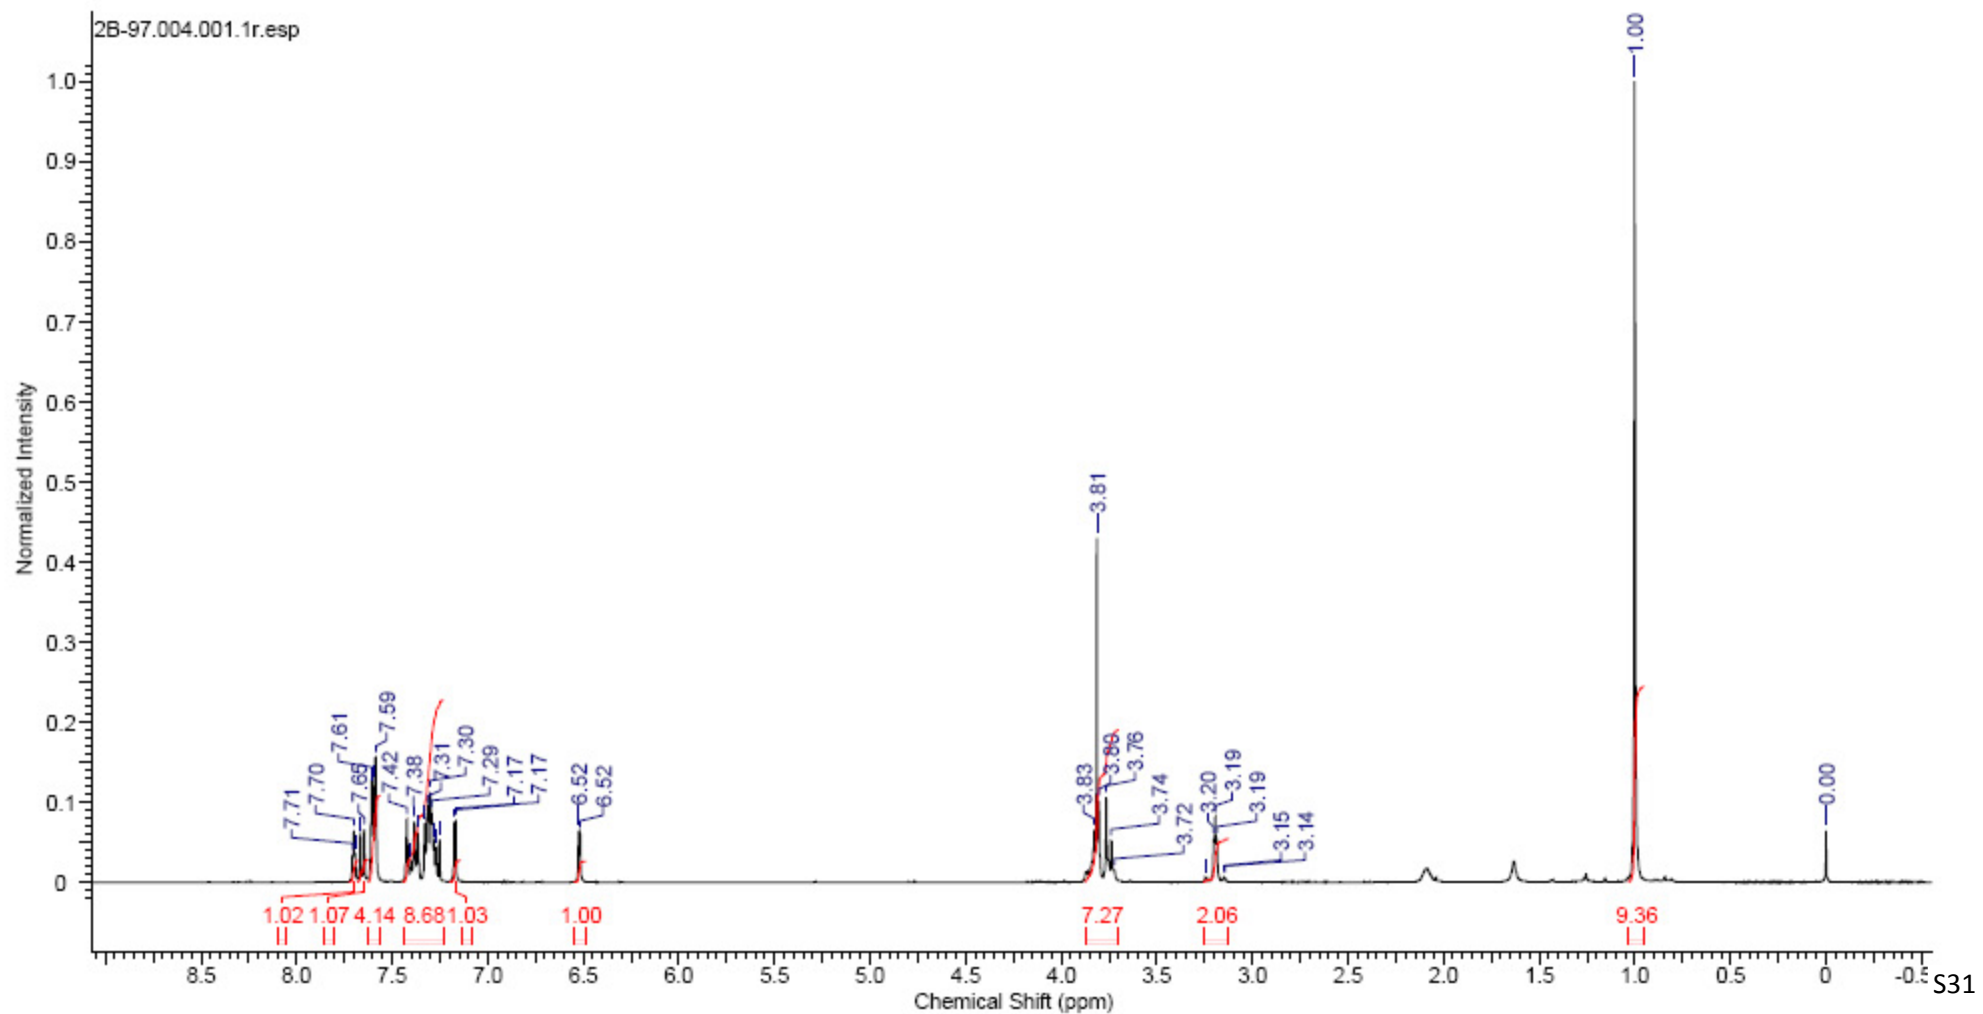

# 13c

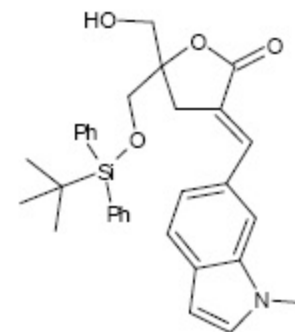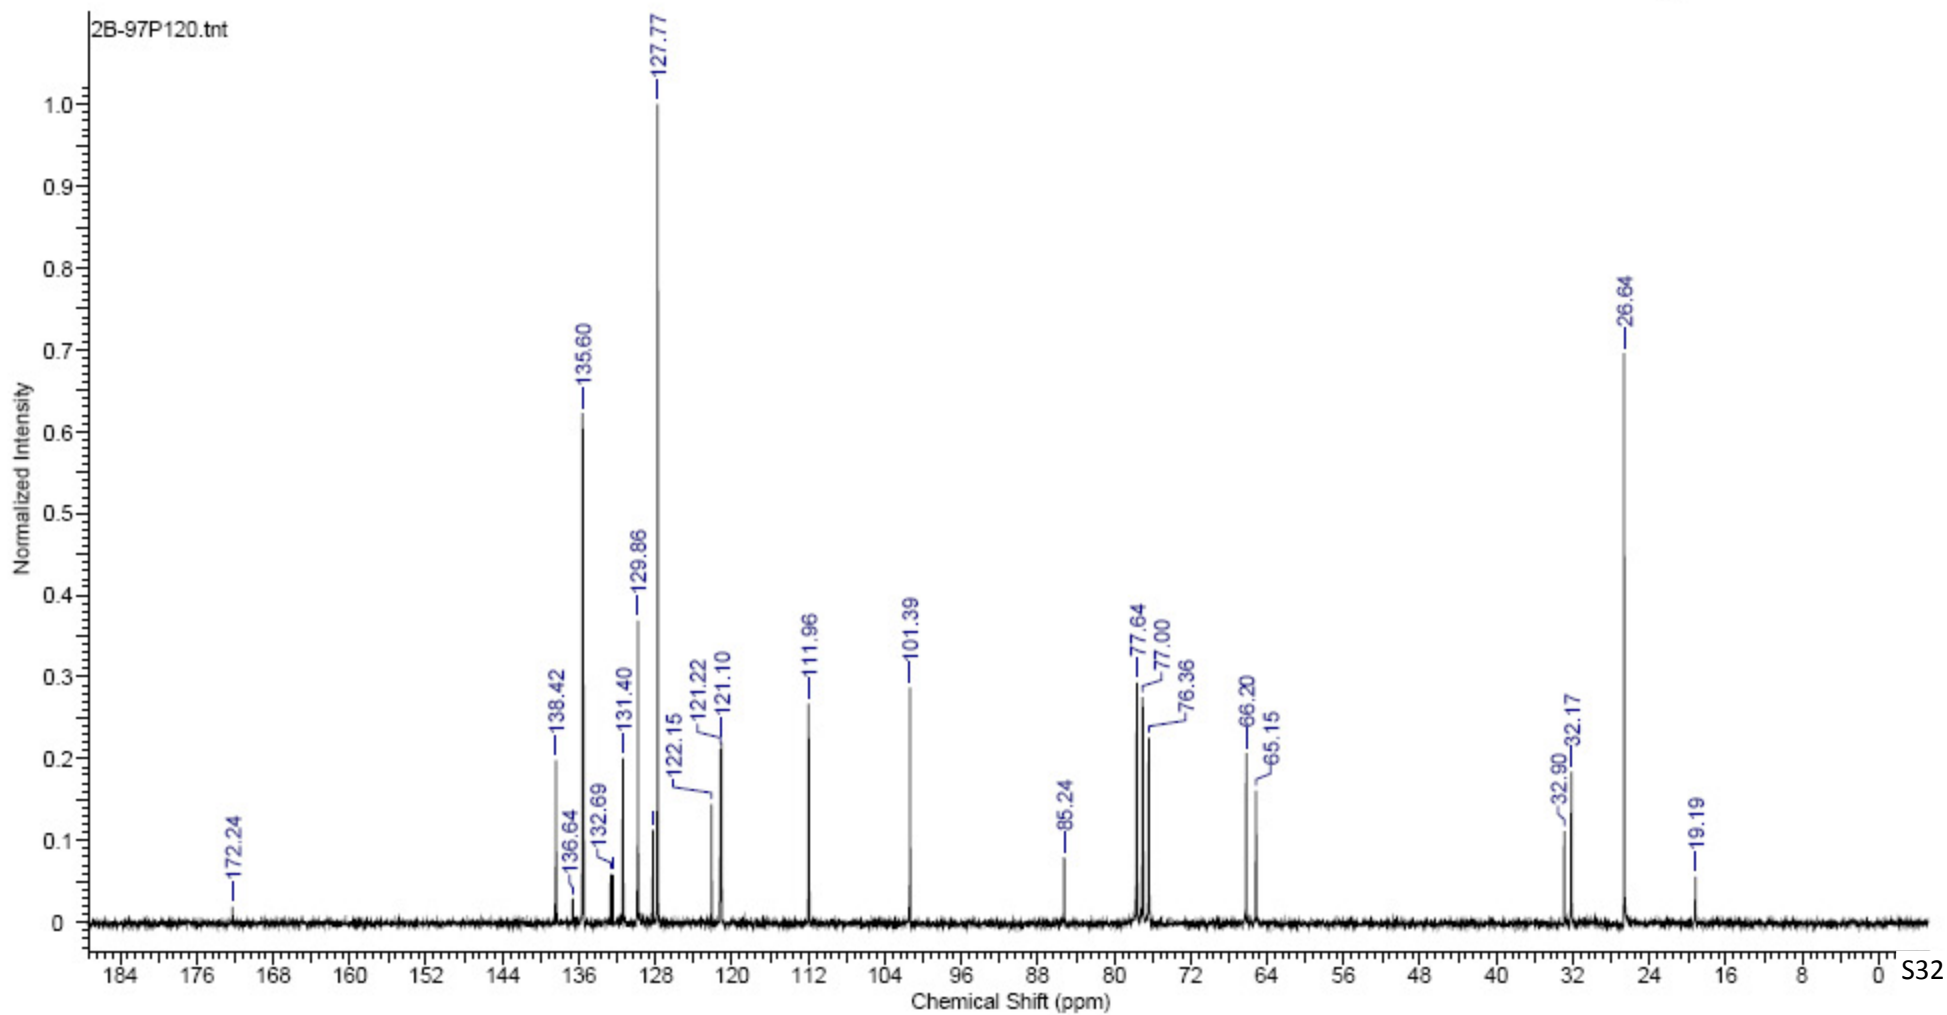



# 13d

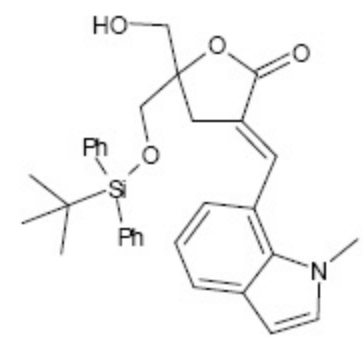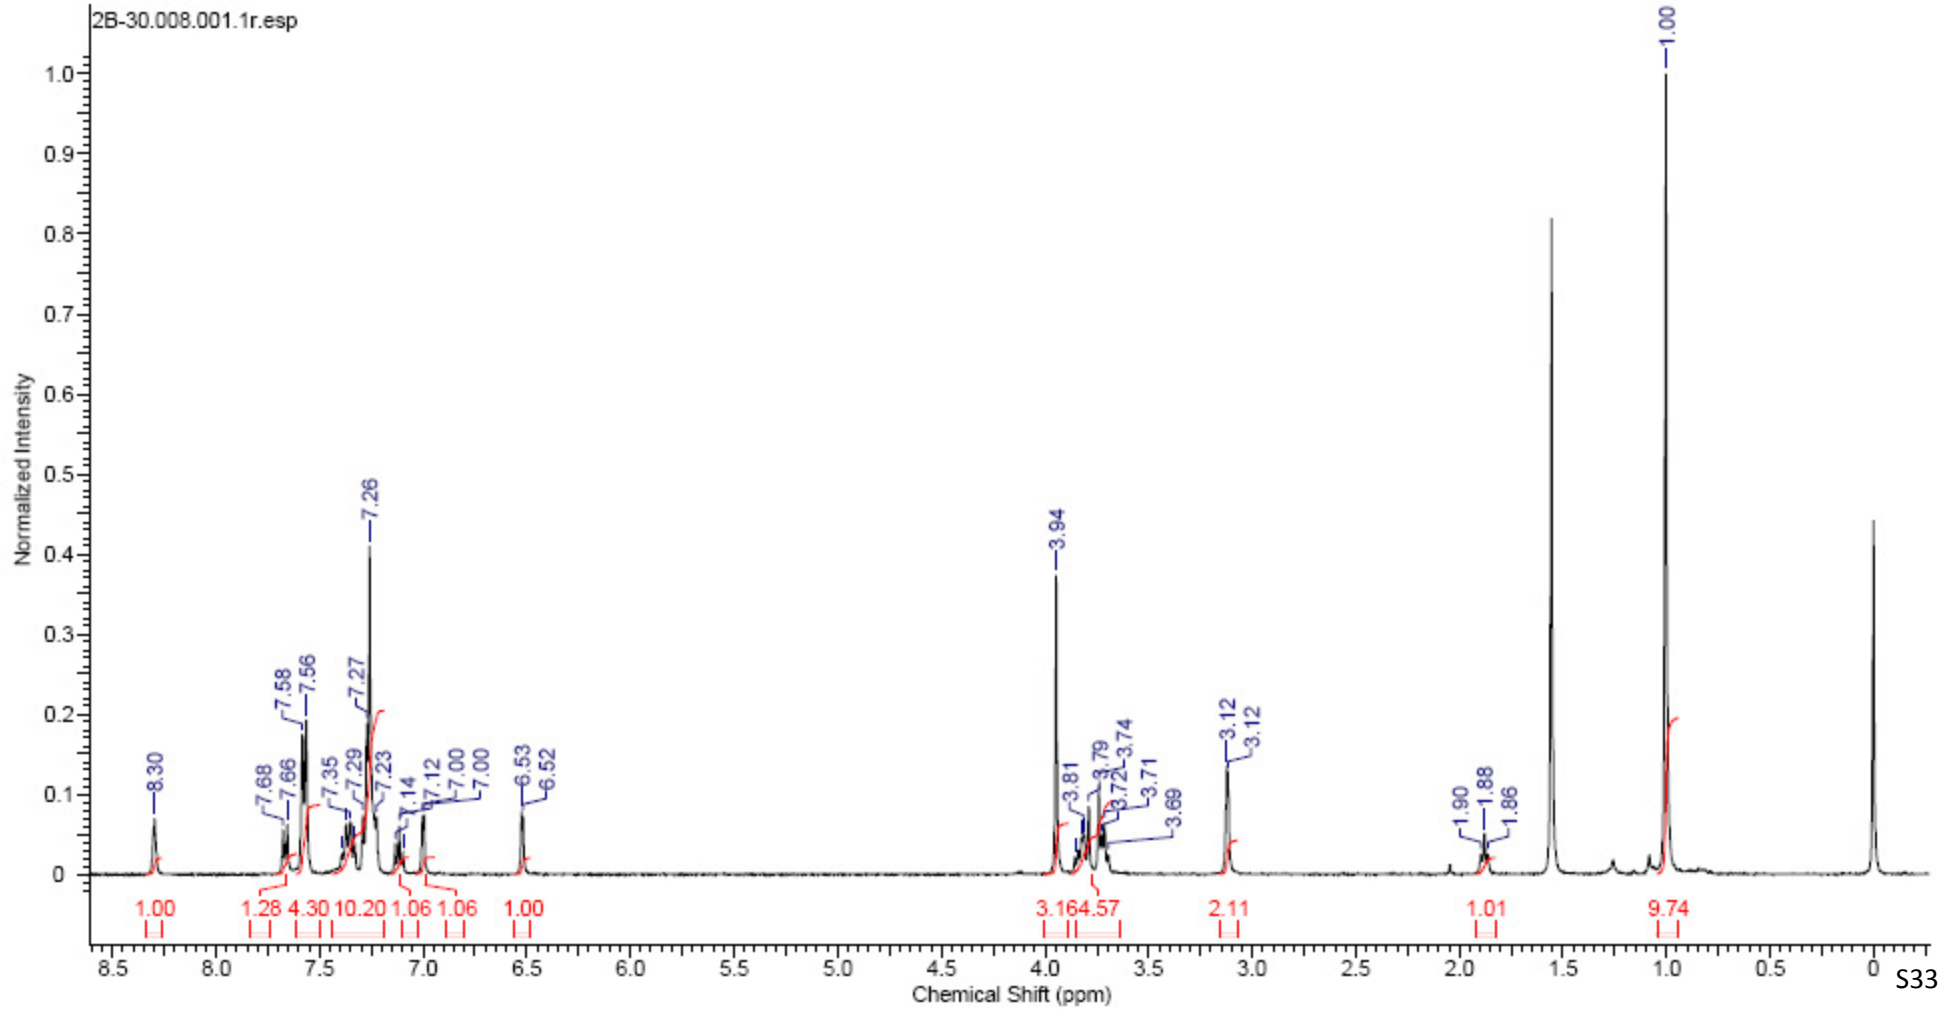

# 13d

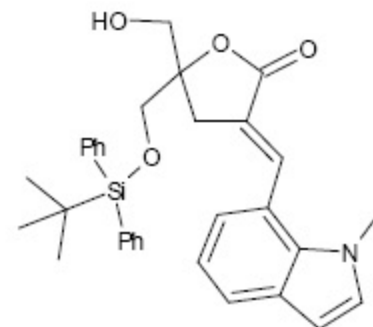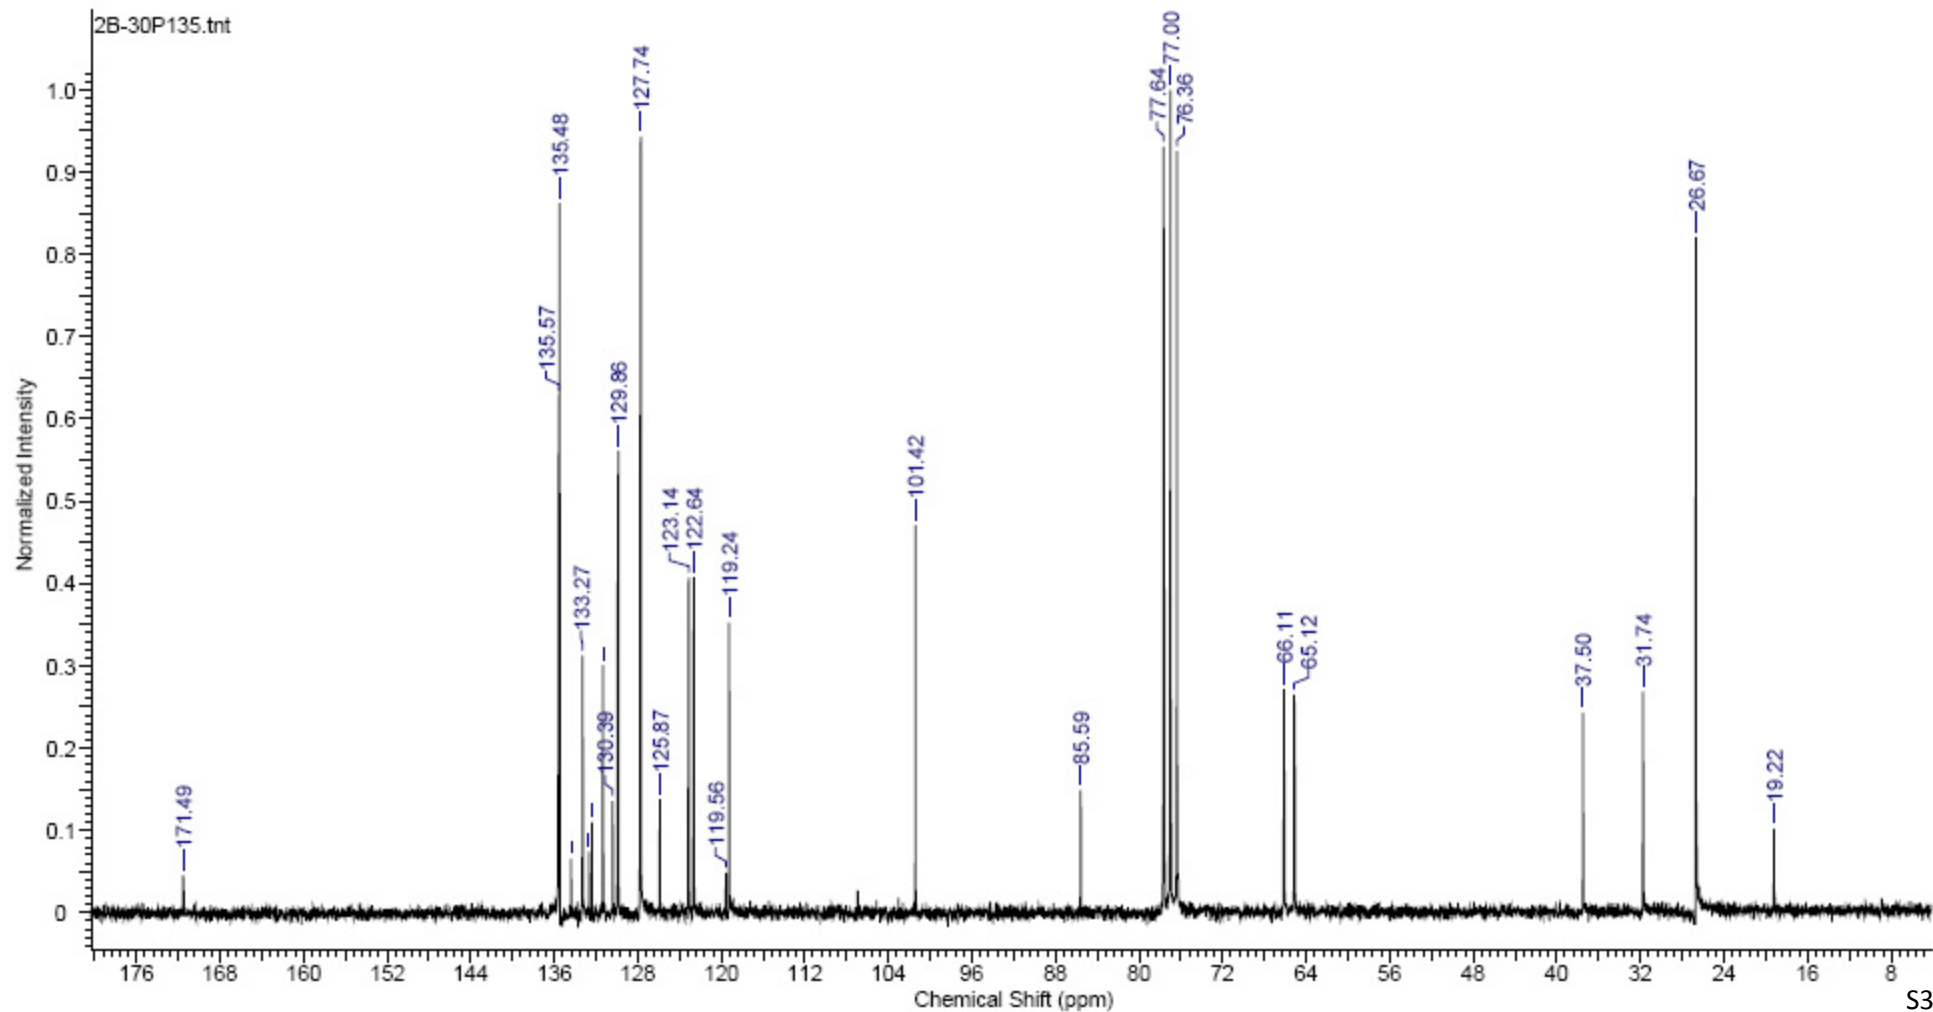

# 14a

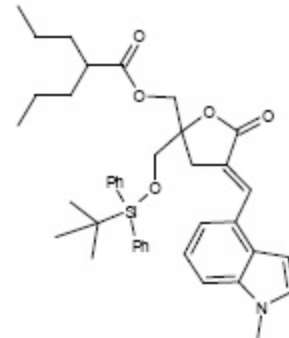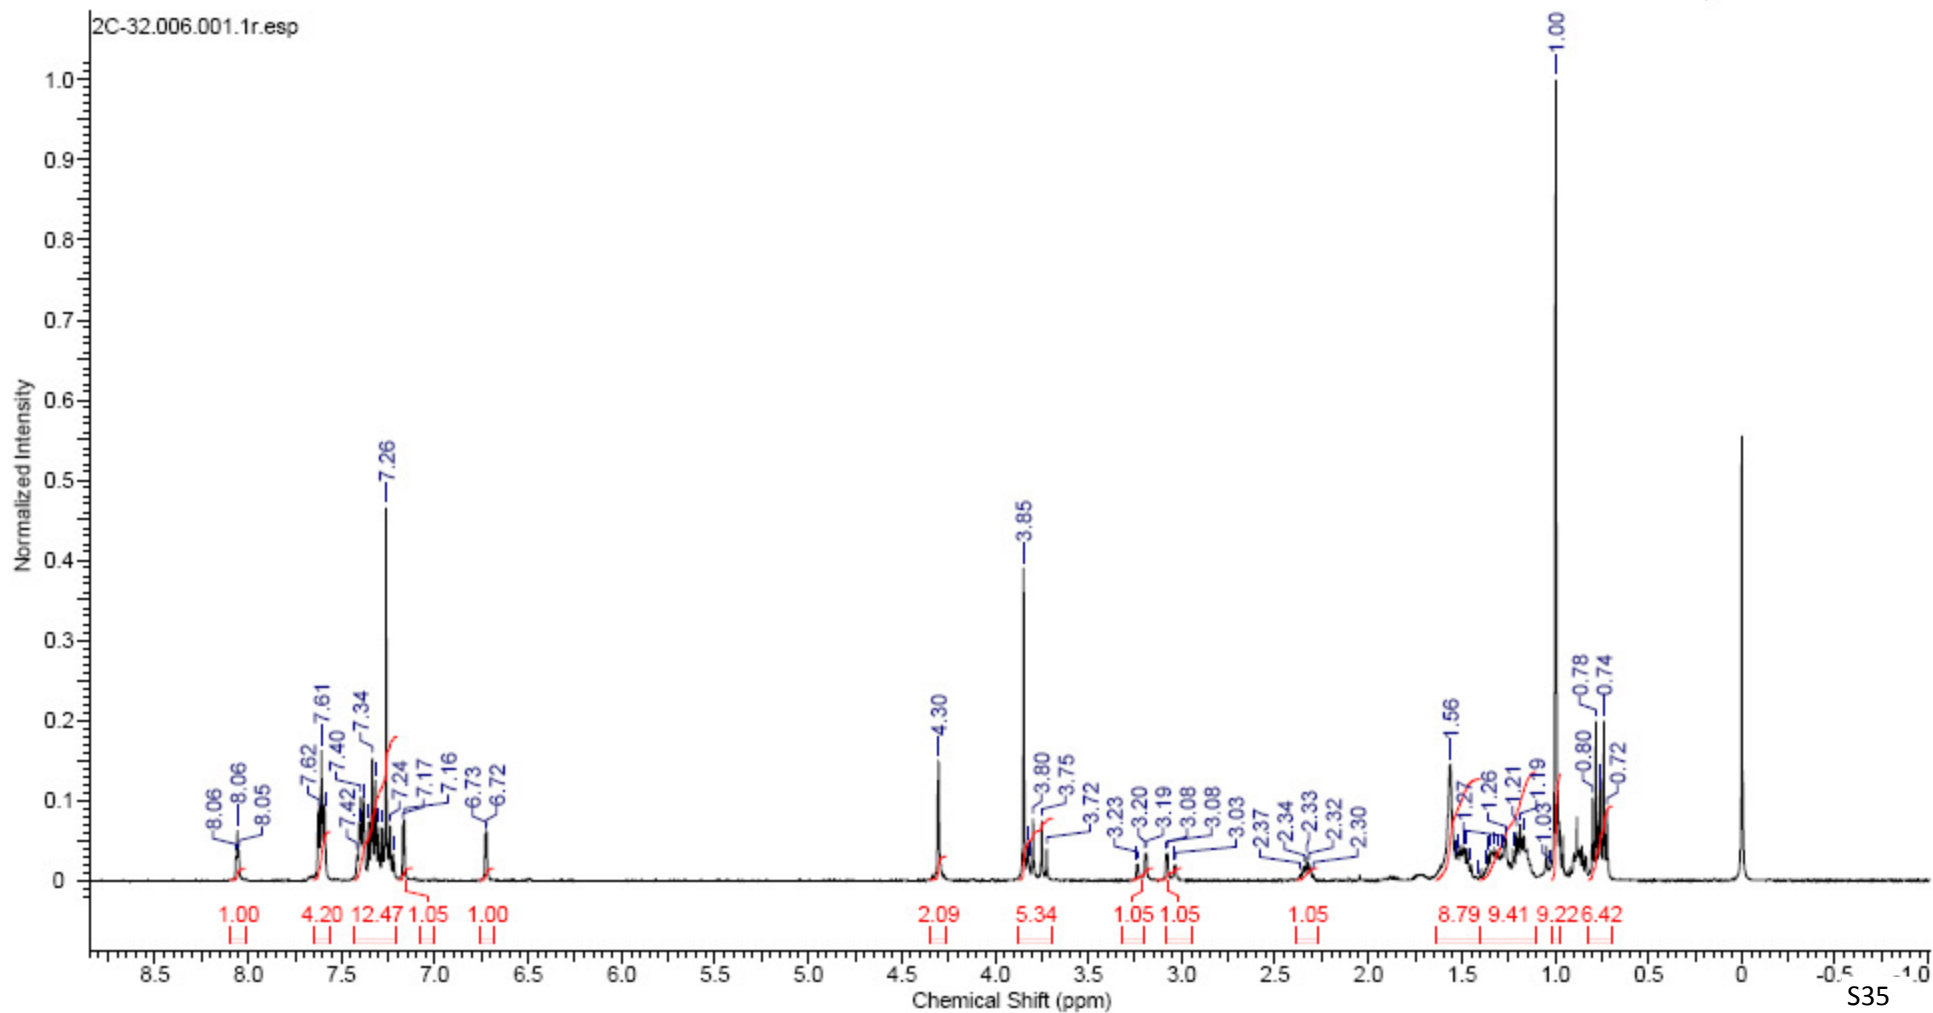

# 14a

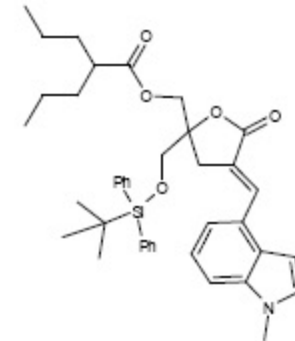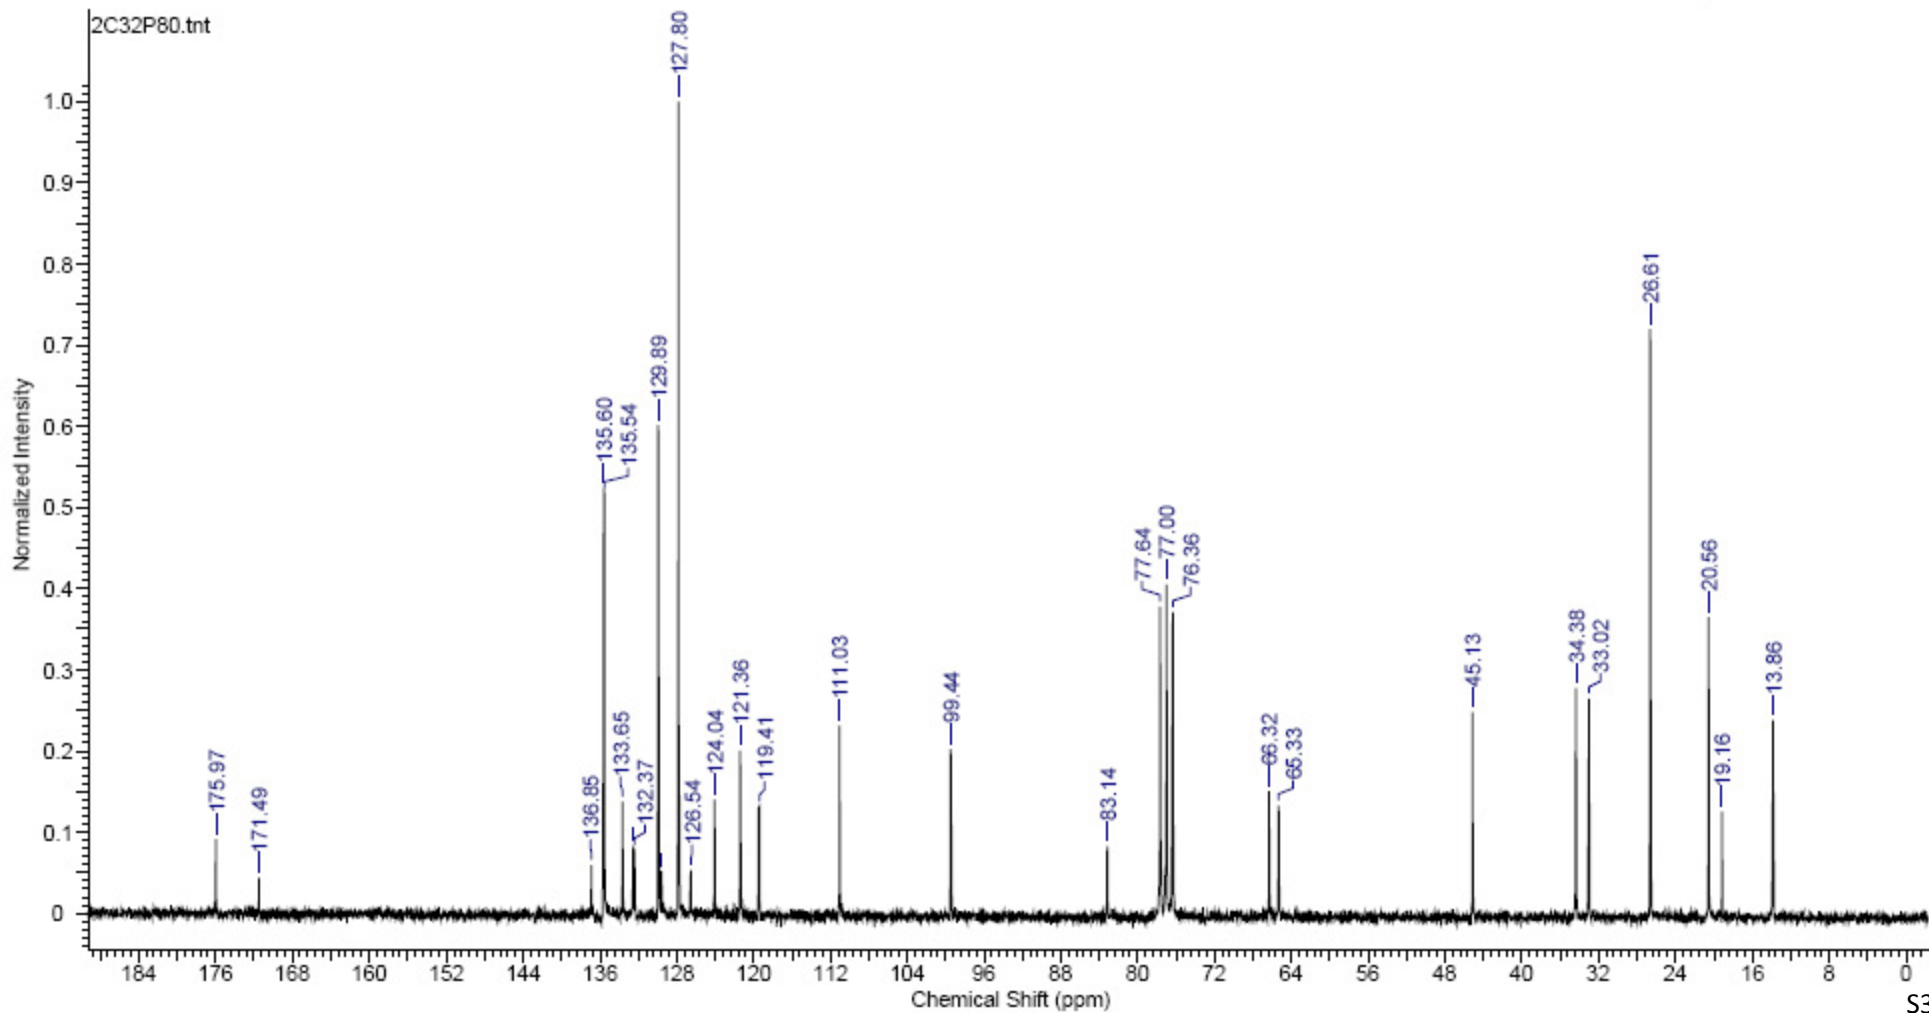

# 14c

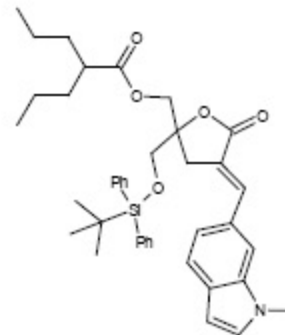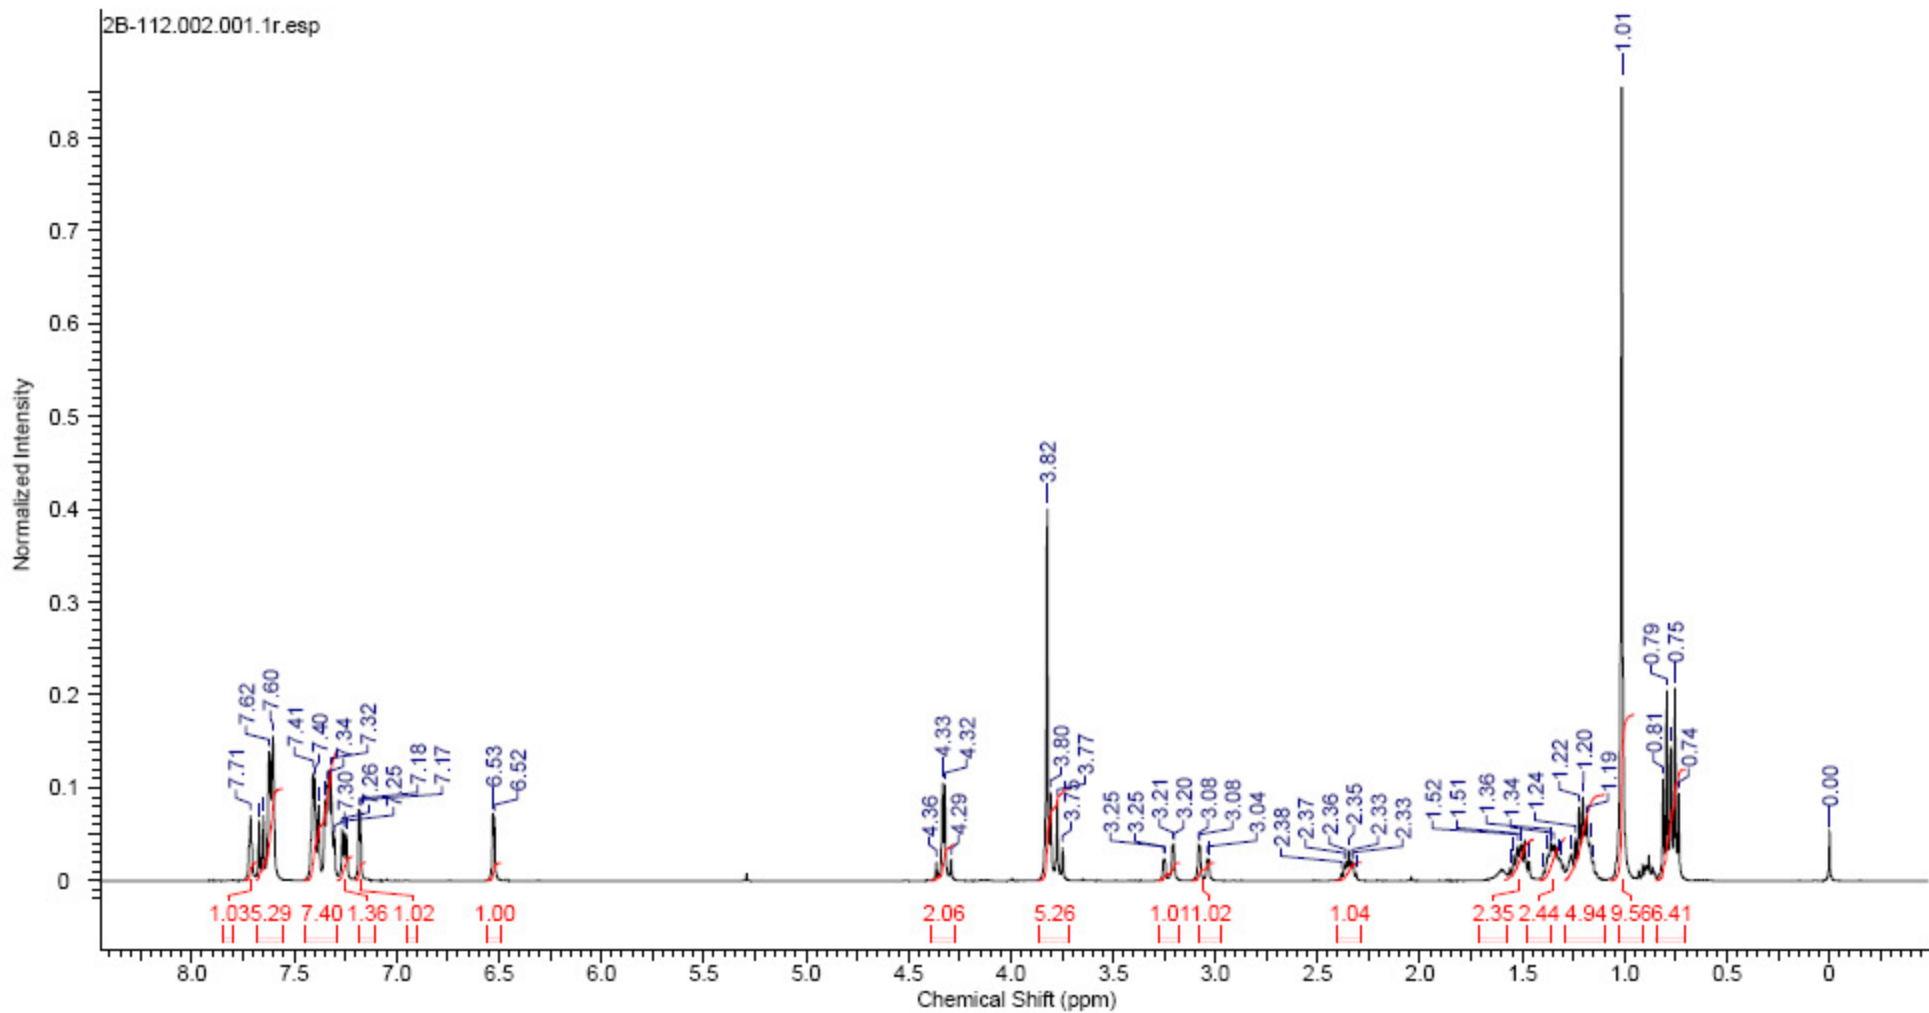

# 14c

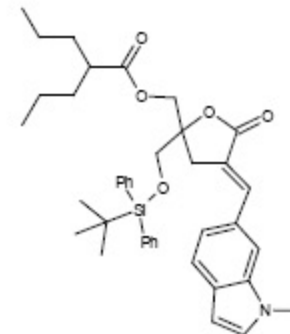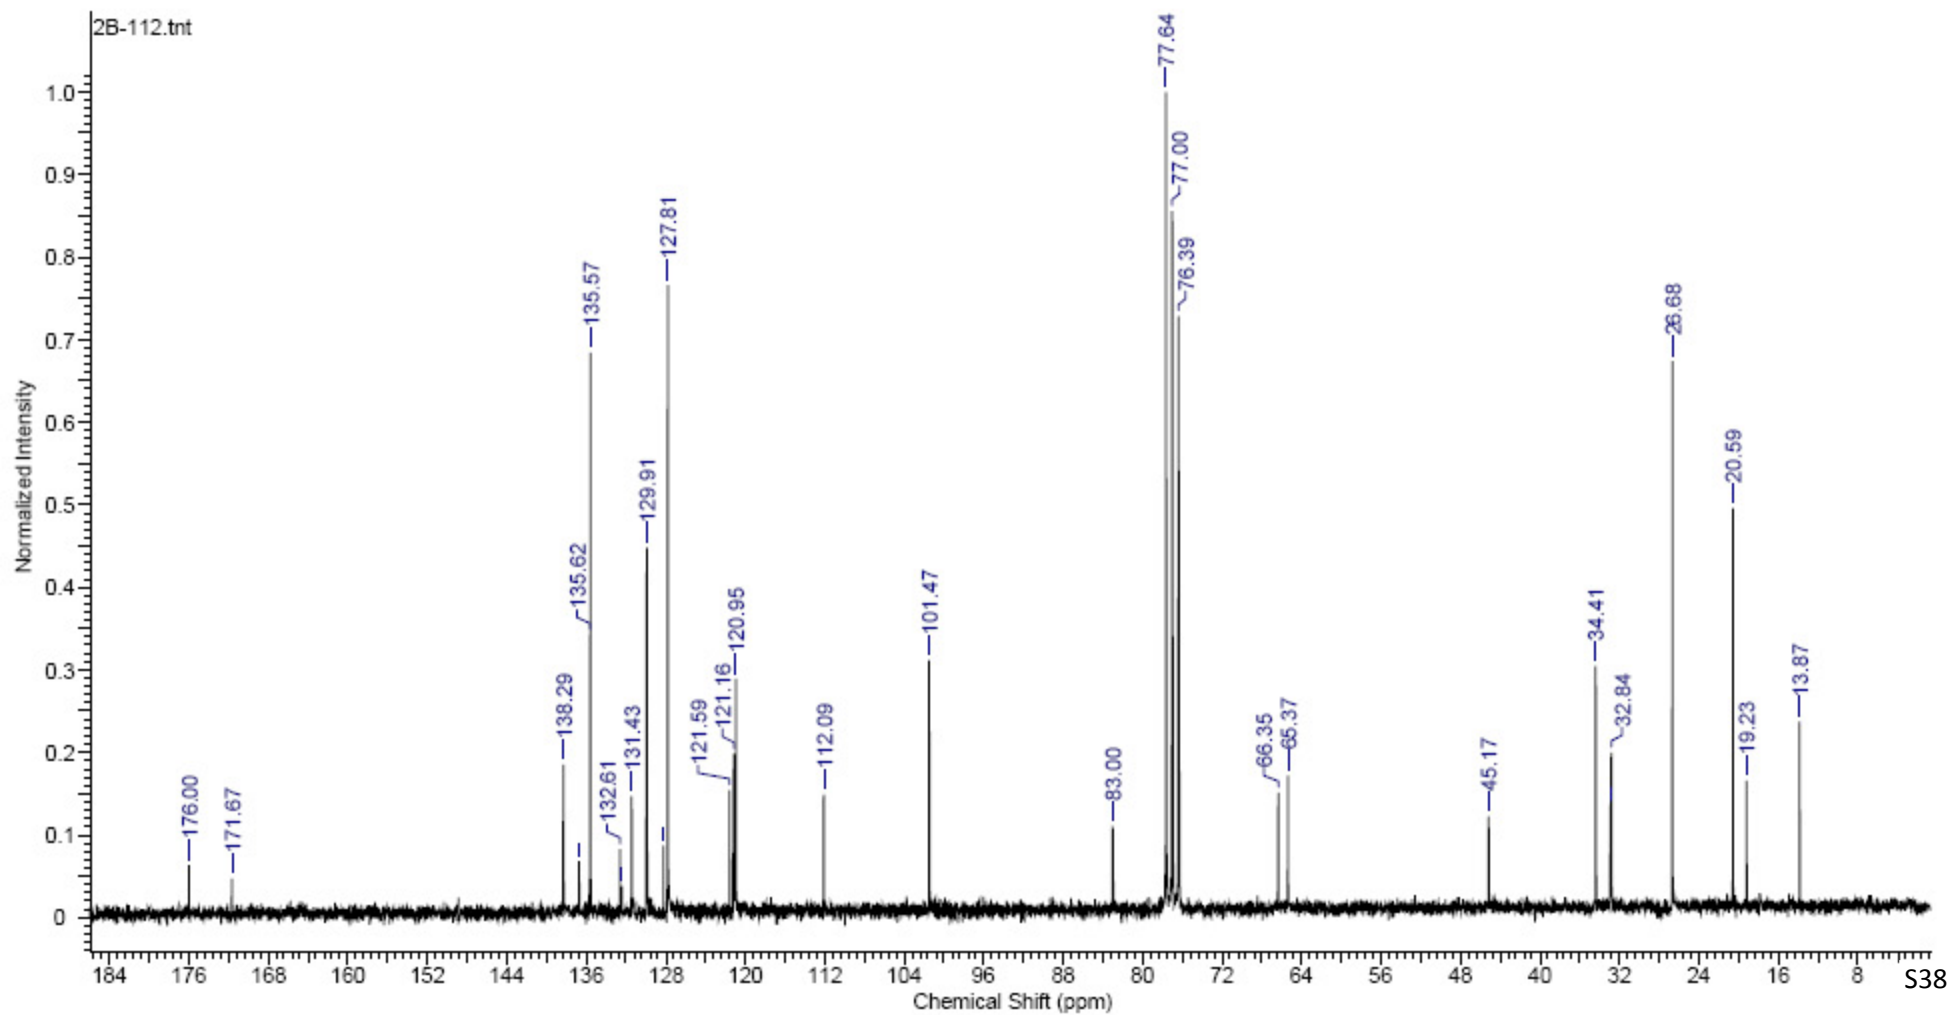

# 14d

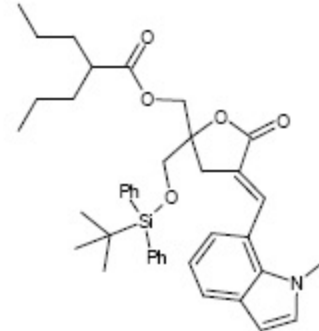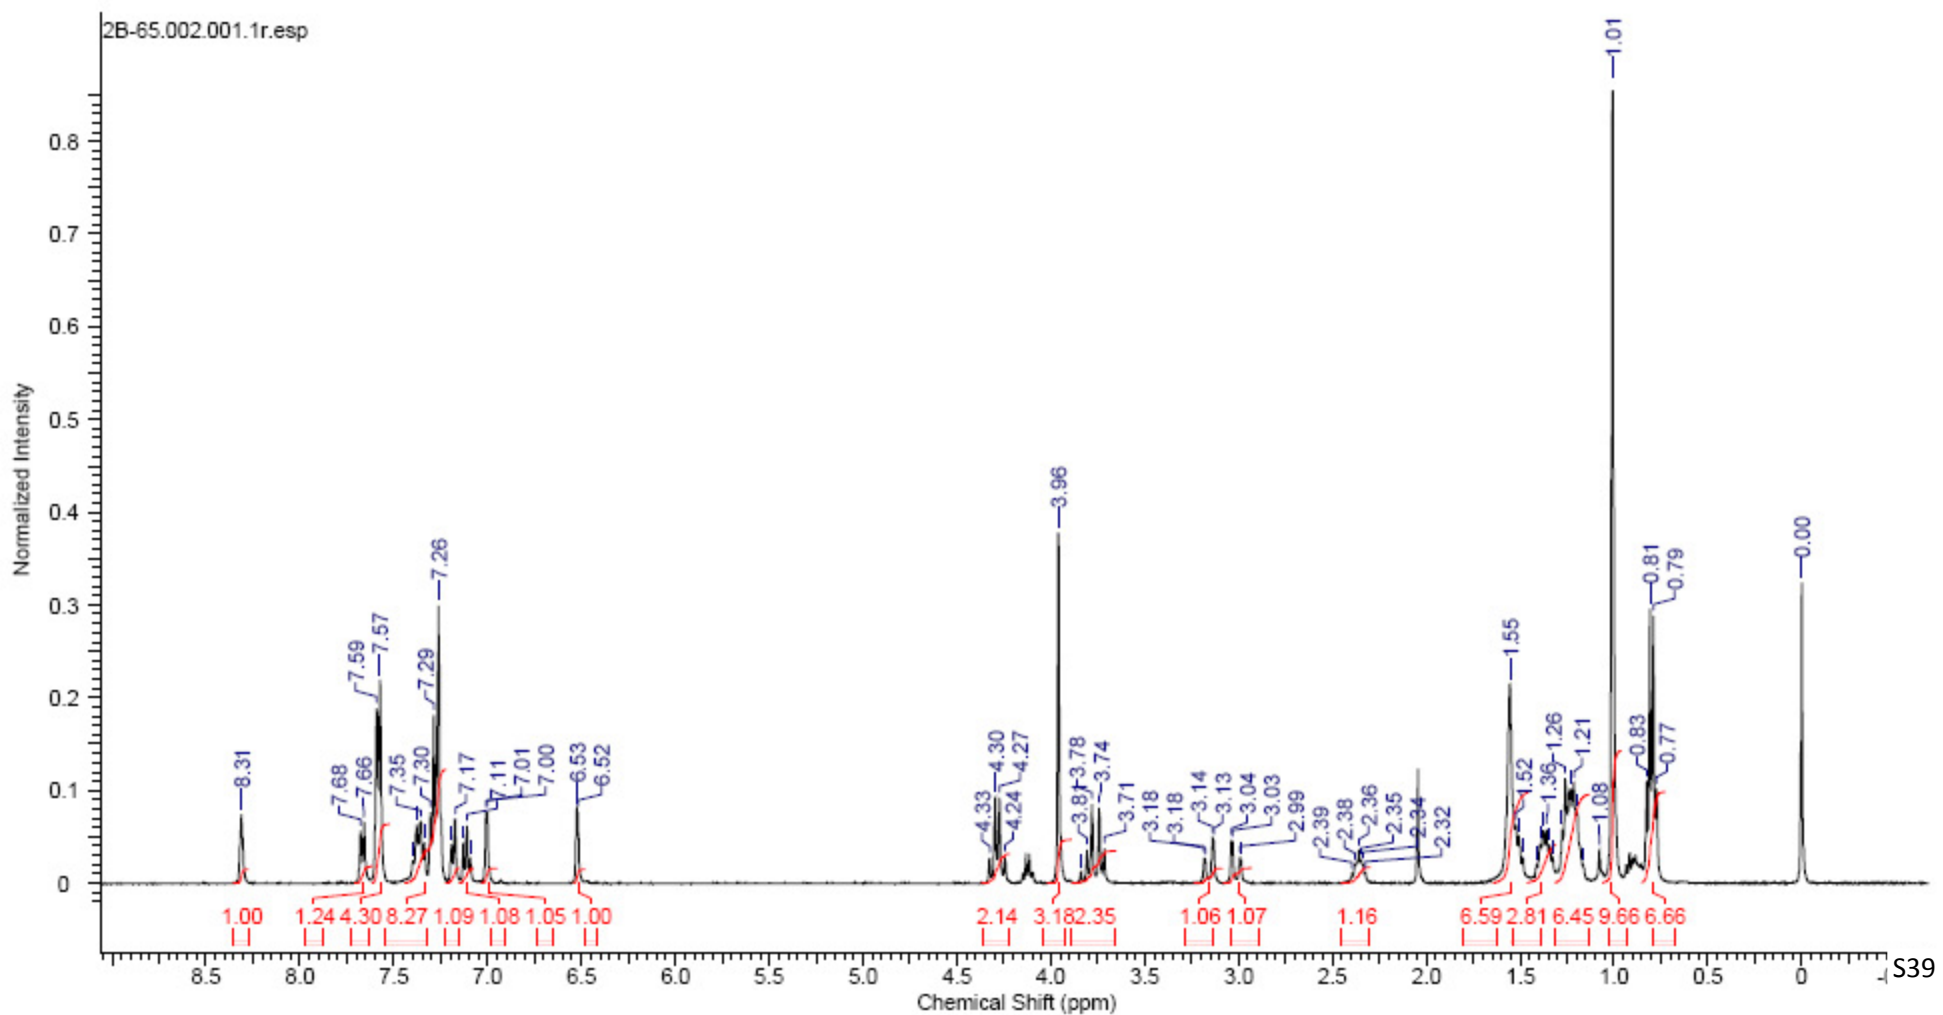

# 14d

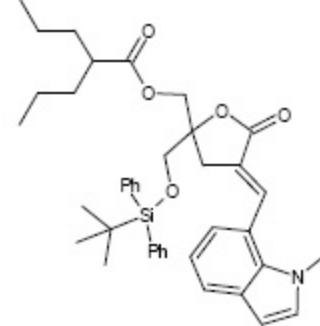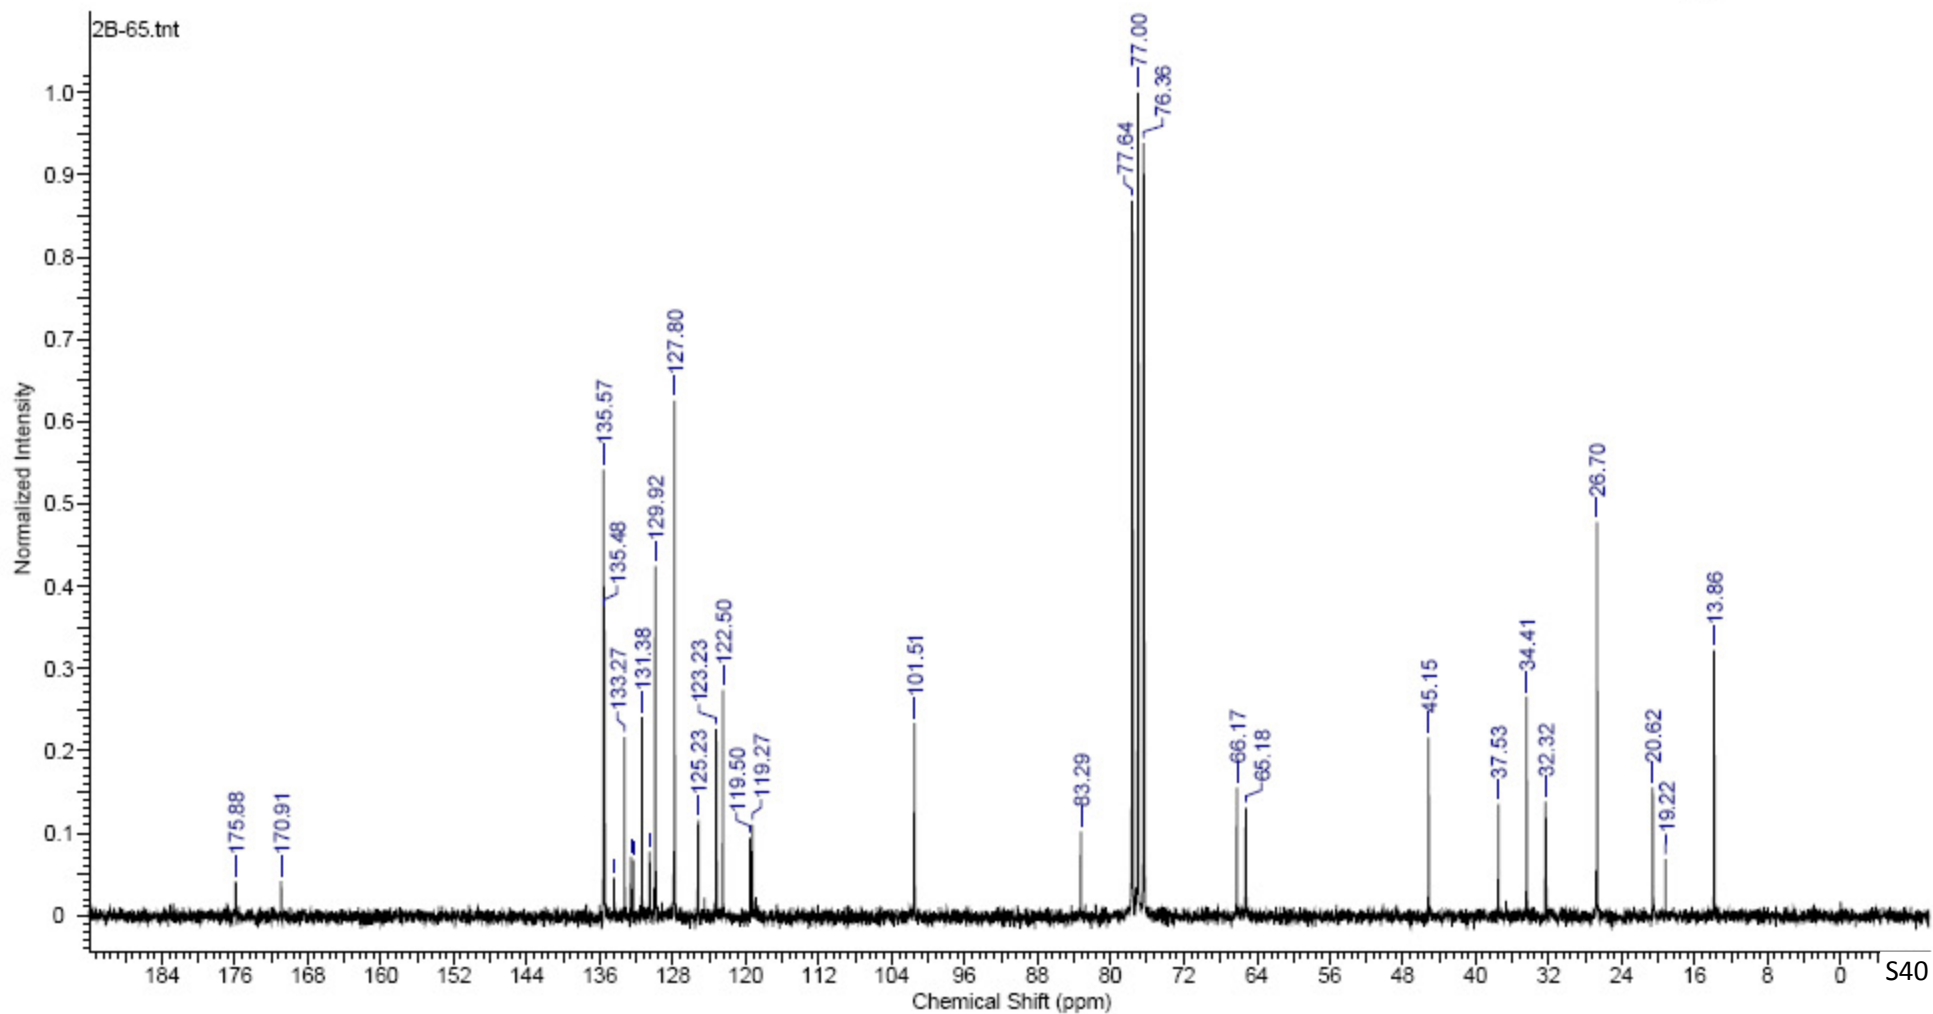



2

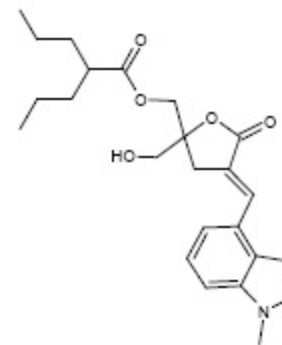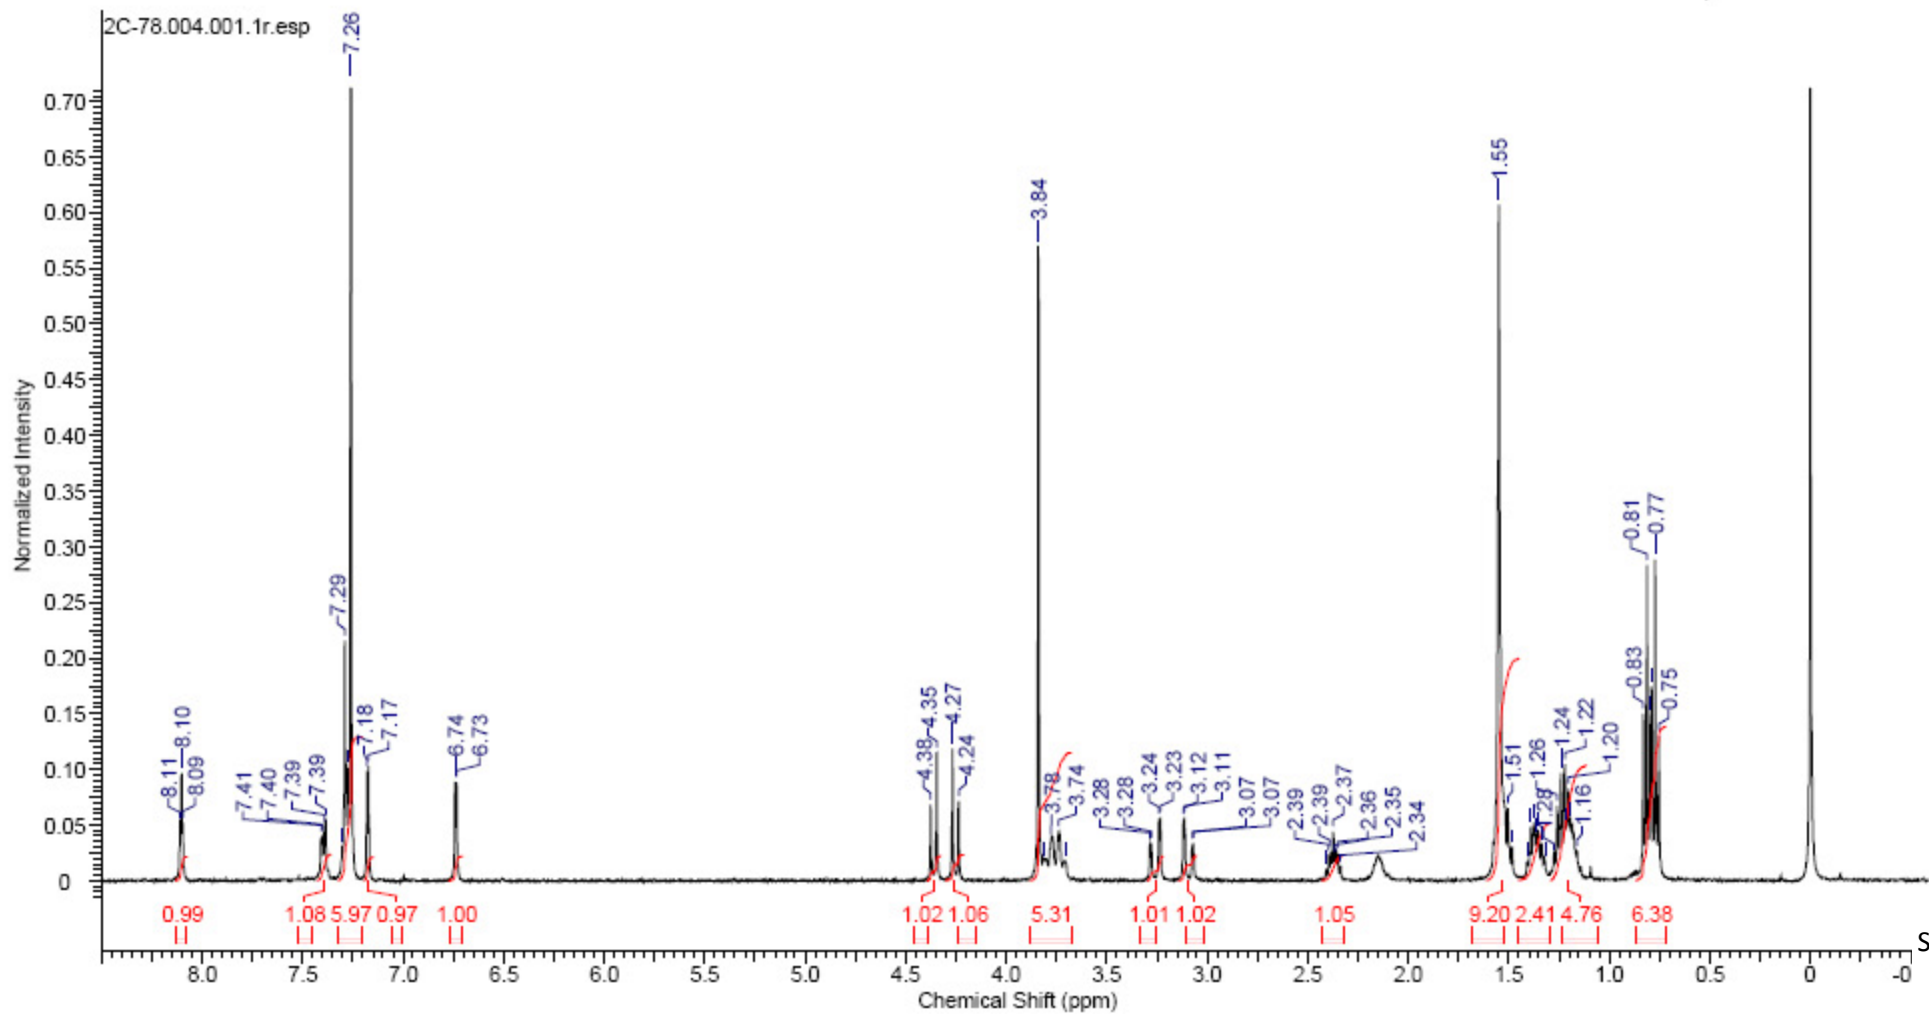

# 2

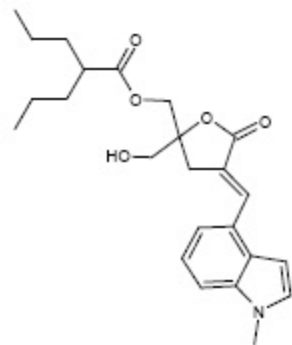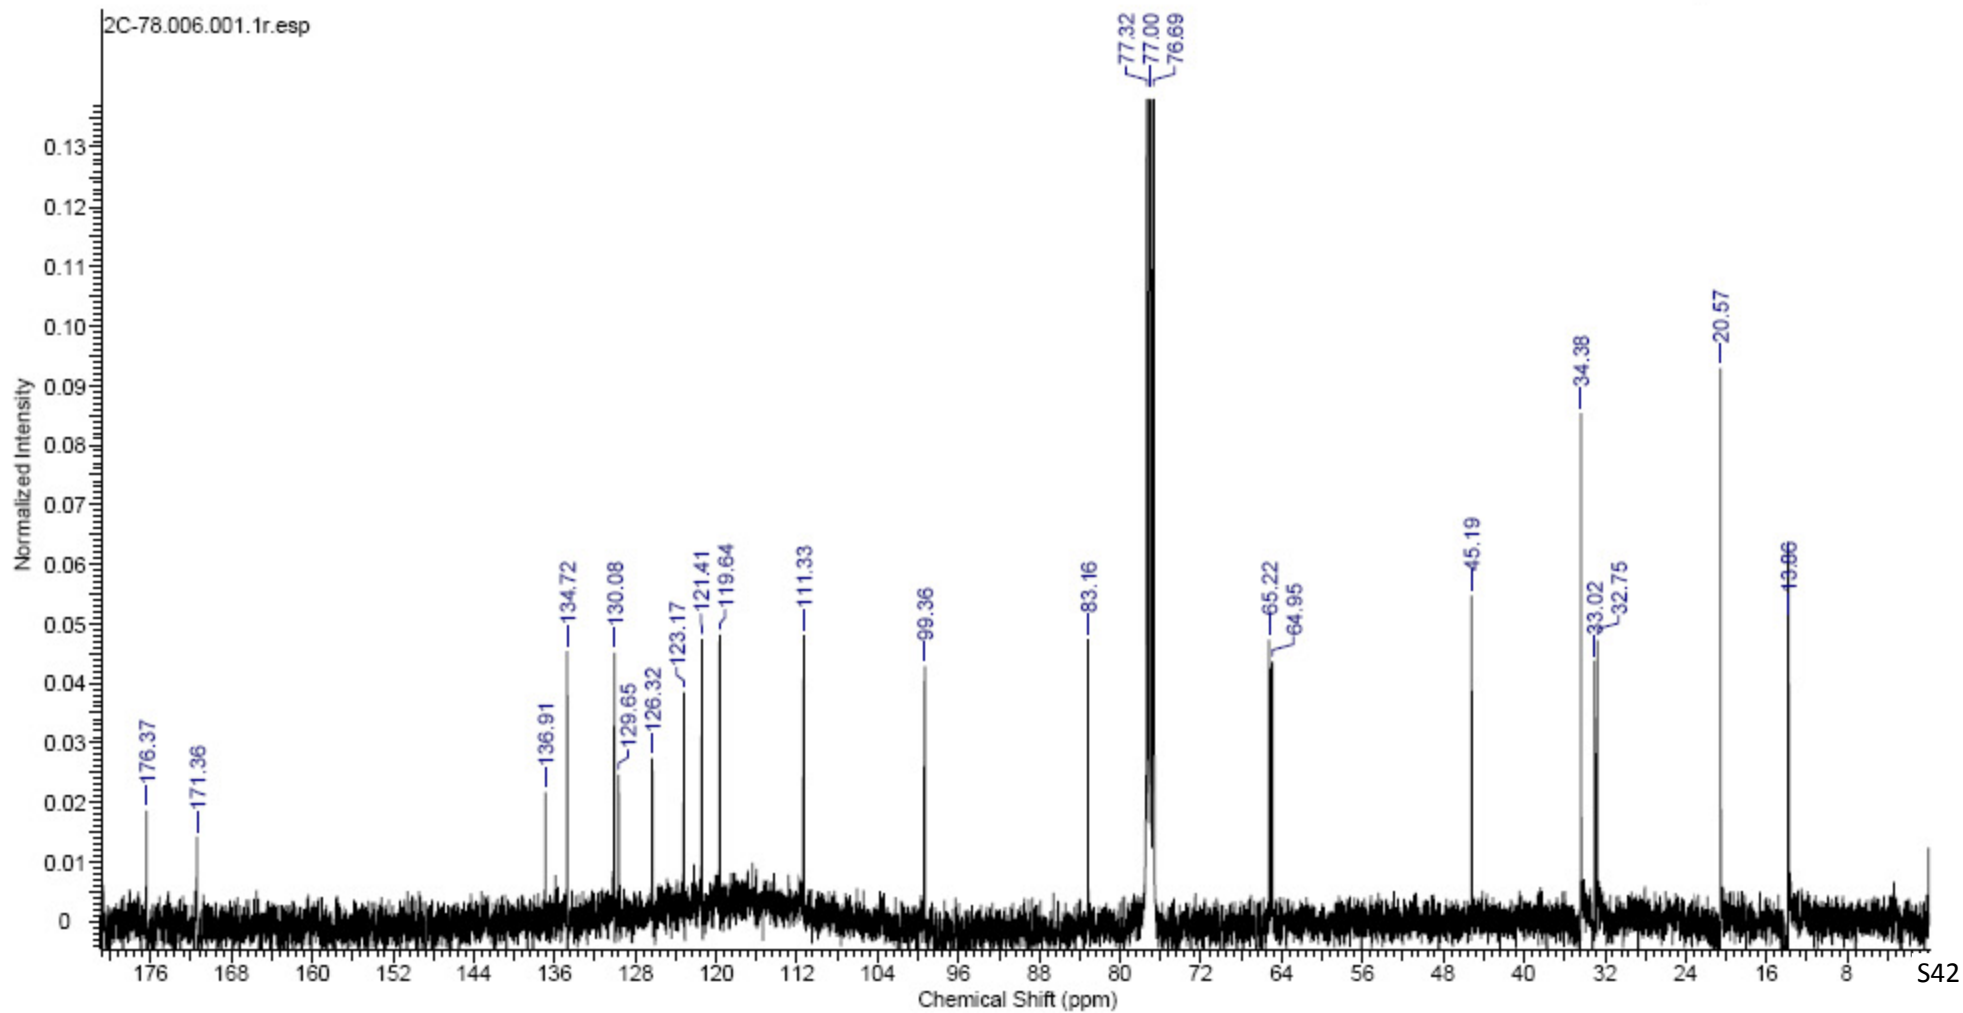

2

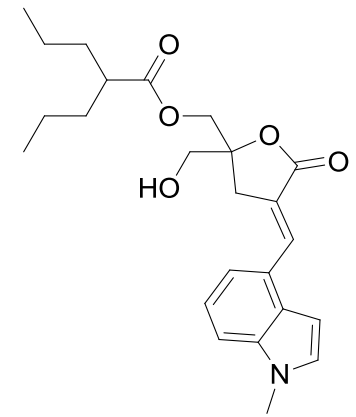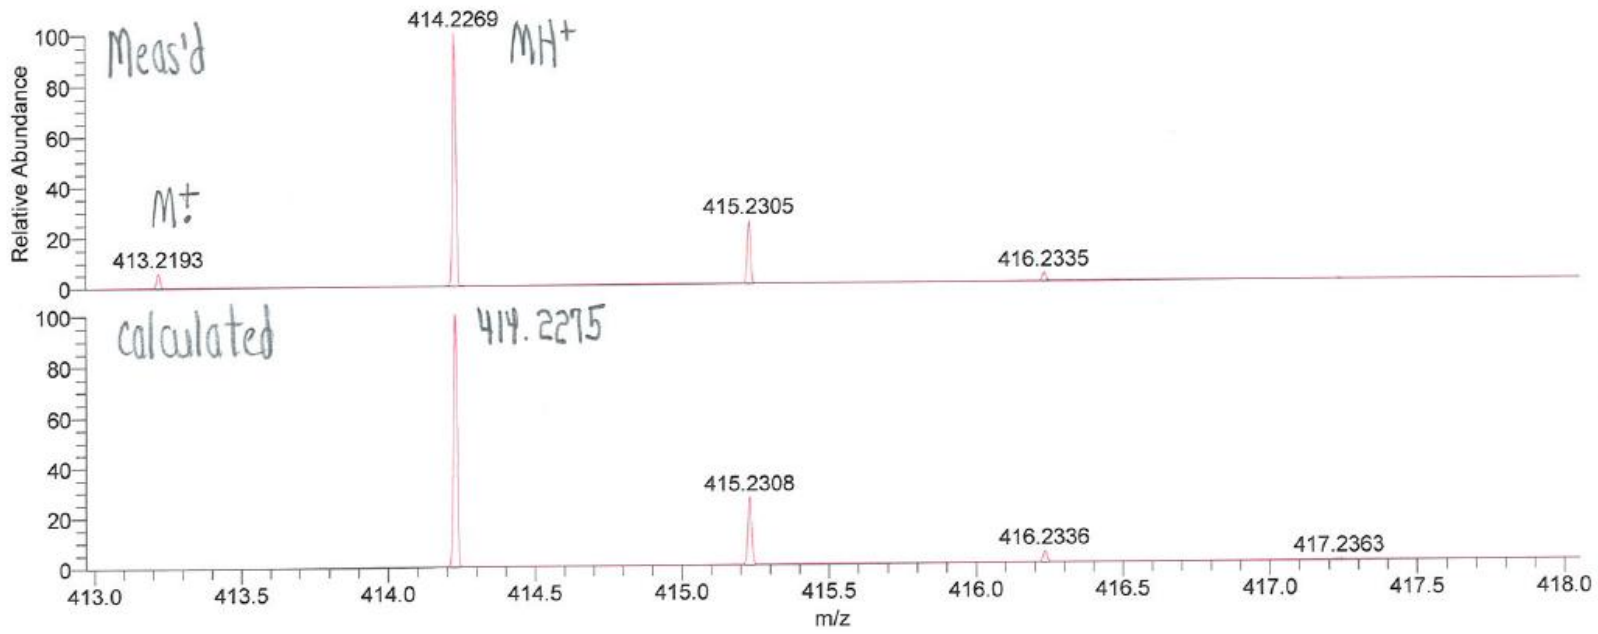

NL:  
1.79E6  
J\_Comin06#244-258 RT:  
6.27-6.64 AV: 15 SB: 43  
5.86-6.27 , 6.64-7.32 F:  
FTMS + p ESI Full ms  
[100.00-1000.00]

NL:  
1.78E4  
C<sub>24</sub> H<sub>31</sub> NO<sub>5</sub> +H:  
C<sub>24</sub> H<sub>32</sub> N<sub>1</sub> O<sub>5</sub>  
p (gss, s /p:40) Chrg 1  
R: 30000 Res .Pwr. @FWHM

**3**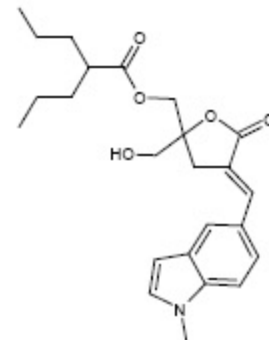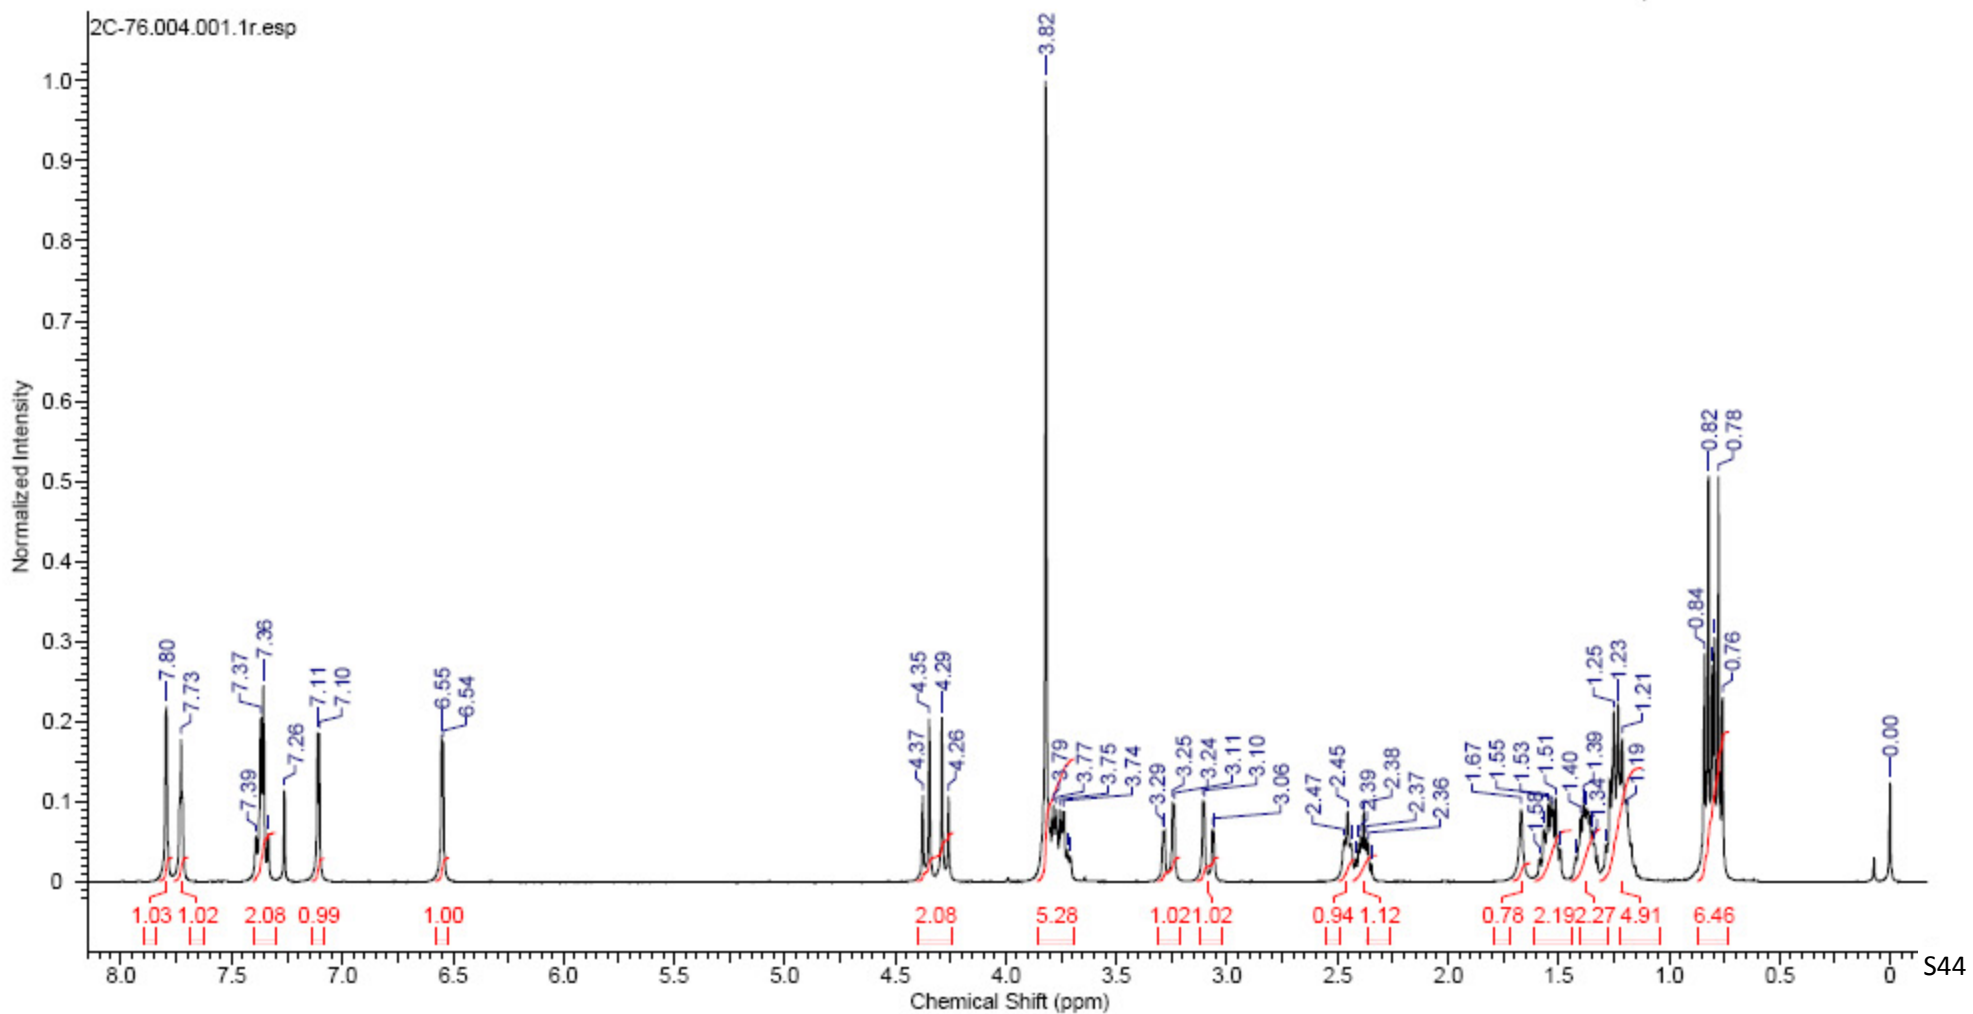

**3**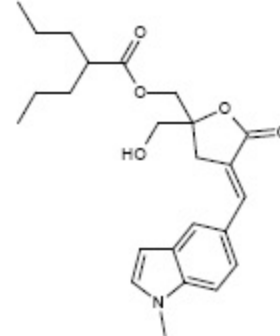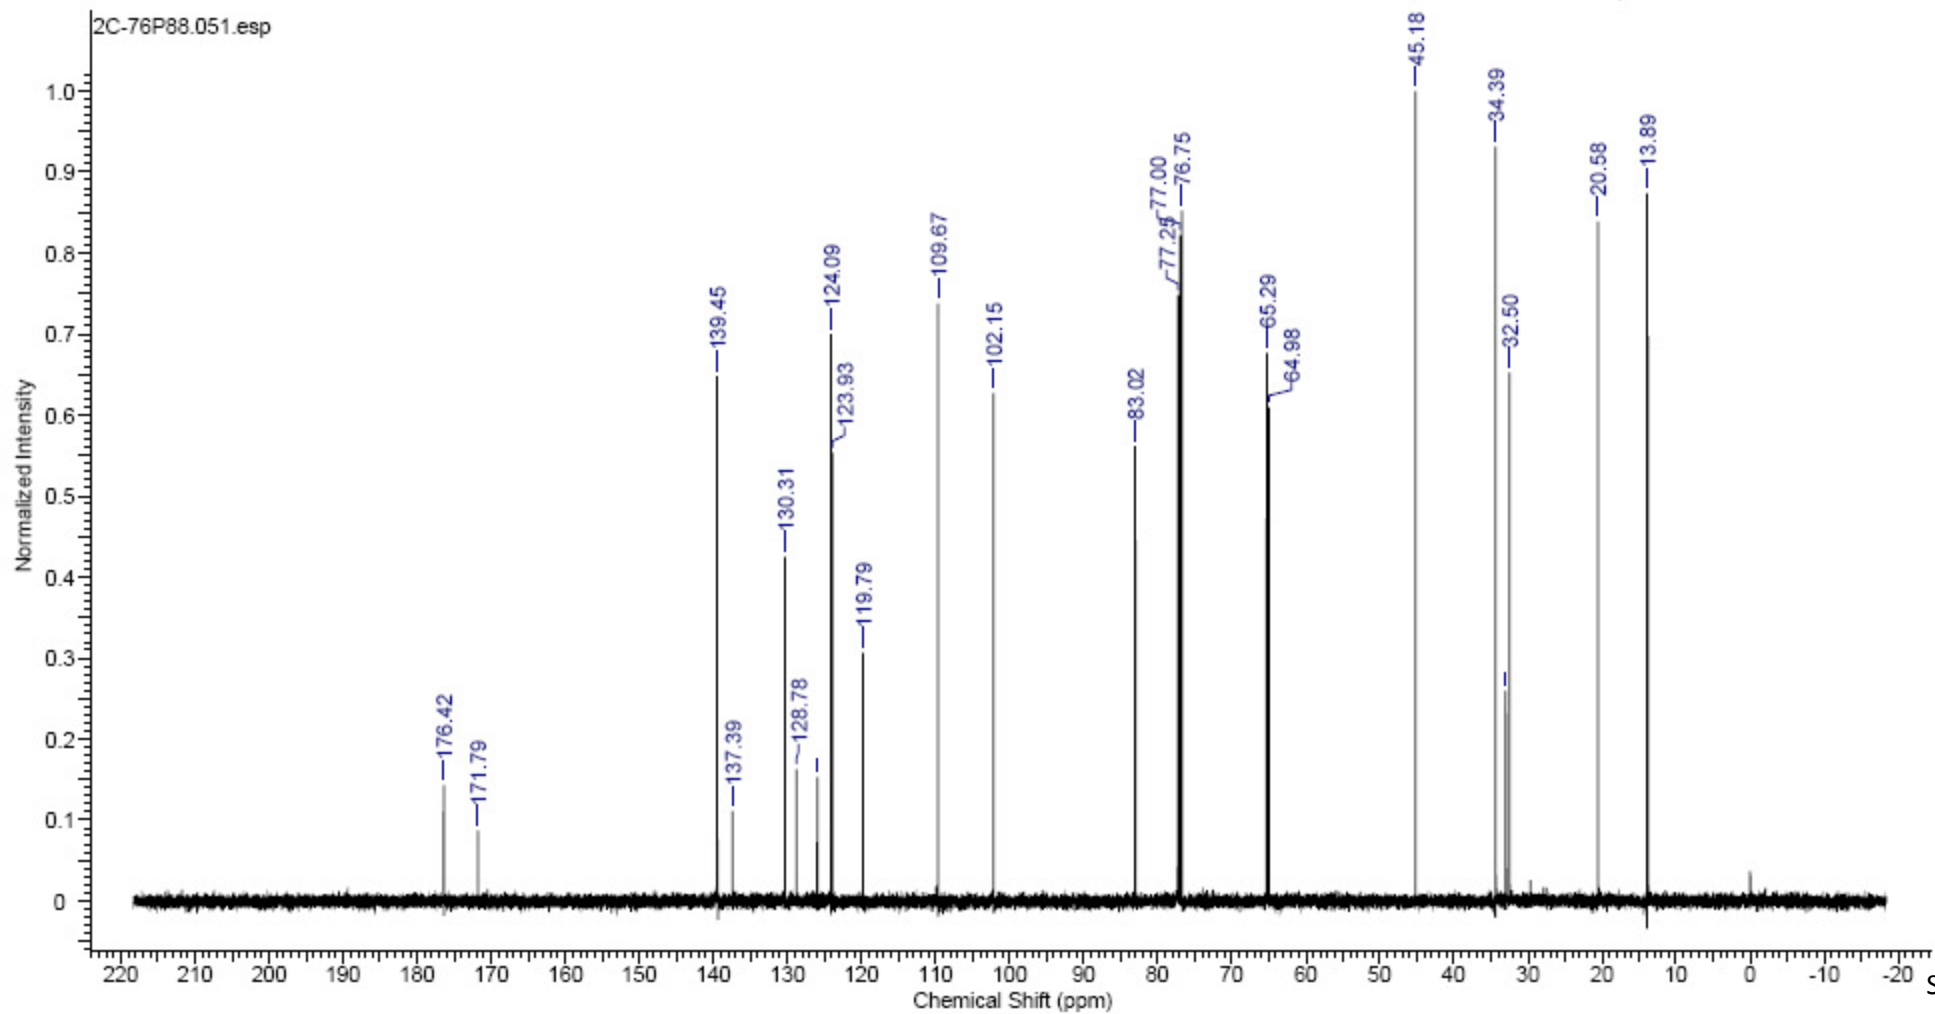

3

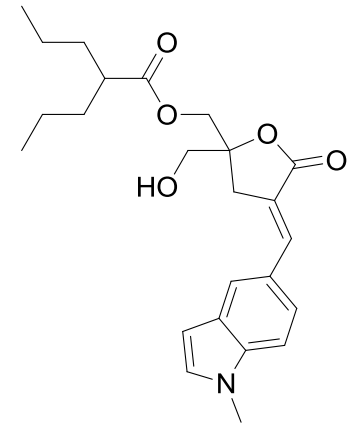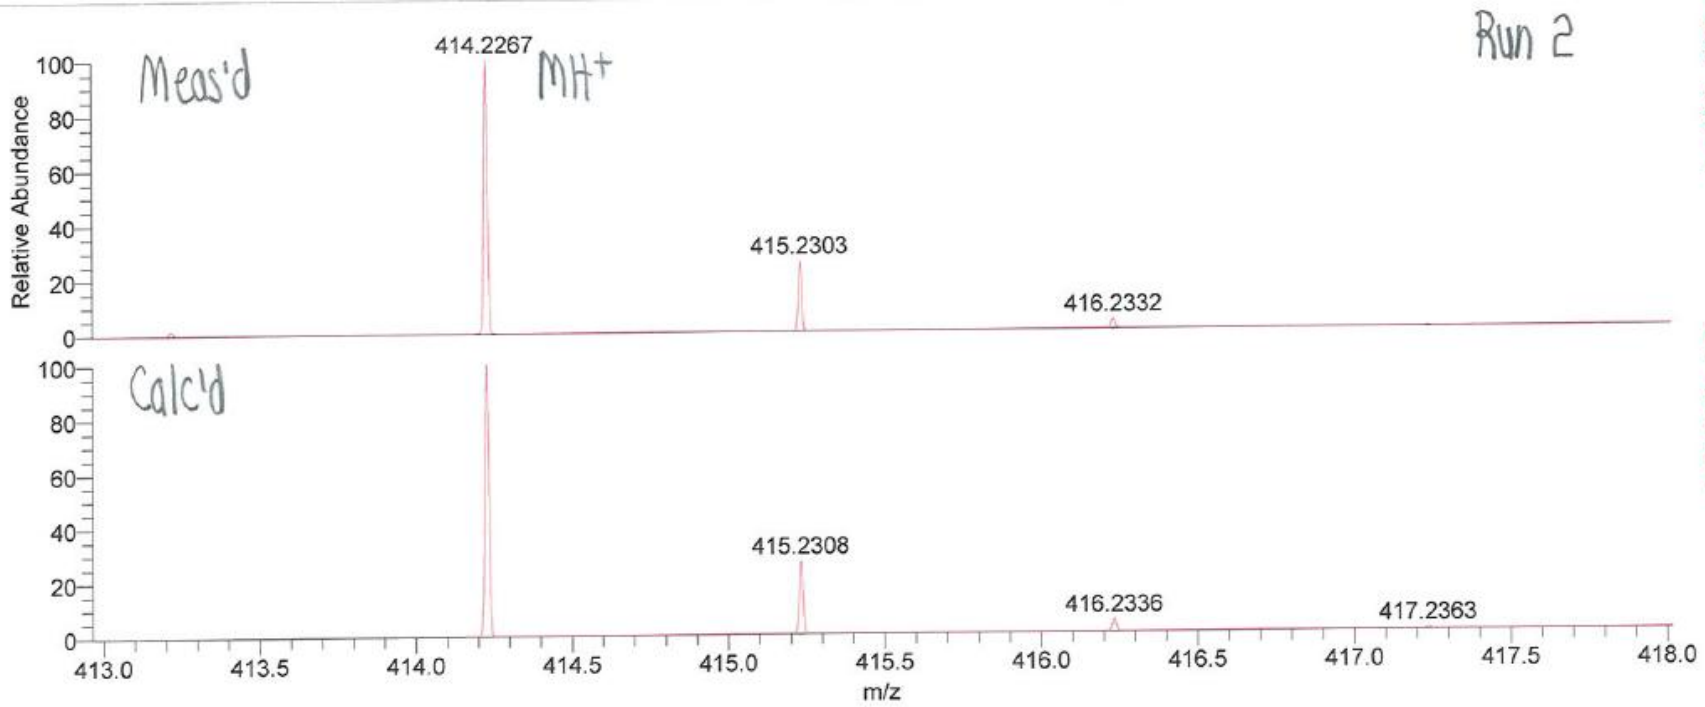

Run 2

NL:  
2.60E6  
J\_Comin05\_130118134237#343-353 RT: 6.29-6.44 AV: 4 SB: 18  
5.71-6.07 , 6.75-7.34 F: FTMS  
+ p ESI Full ms [100.00-1000.00]

NL:  
1.78E4  
C<sub>24</sub> H<sub>31</sub> NO<sub>5</sub> +H:  
C<sub>24</sub> H<sub>32</sub> N<sub>1</sub> O<sub>5</sub>  
p (gss, s /p:40) Chrg 1  
R: 30000 Res .Pwr . @FWHM

4

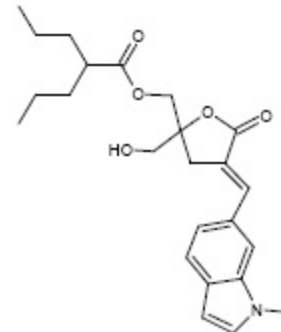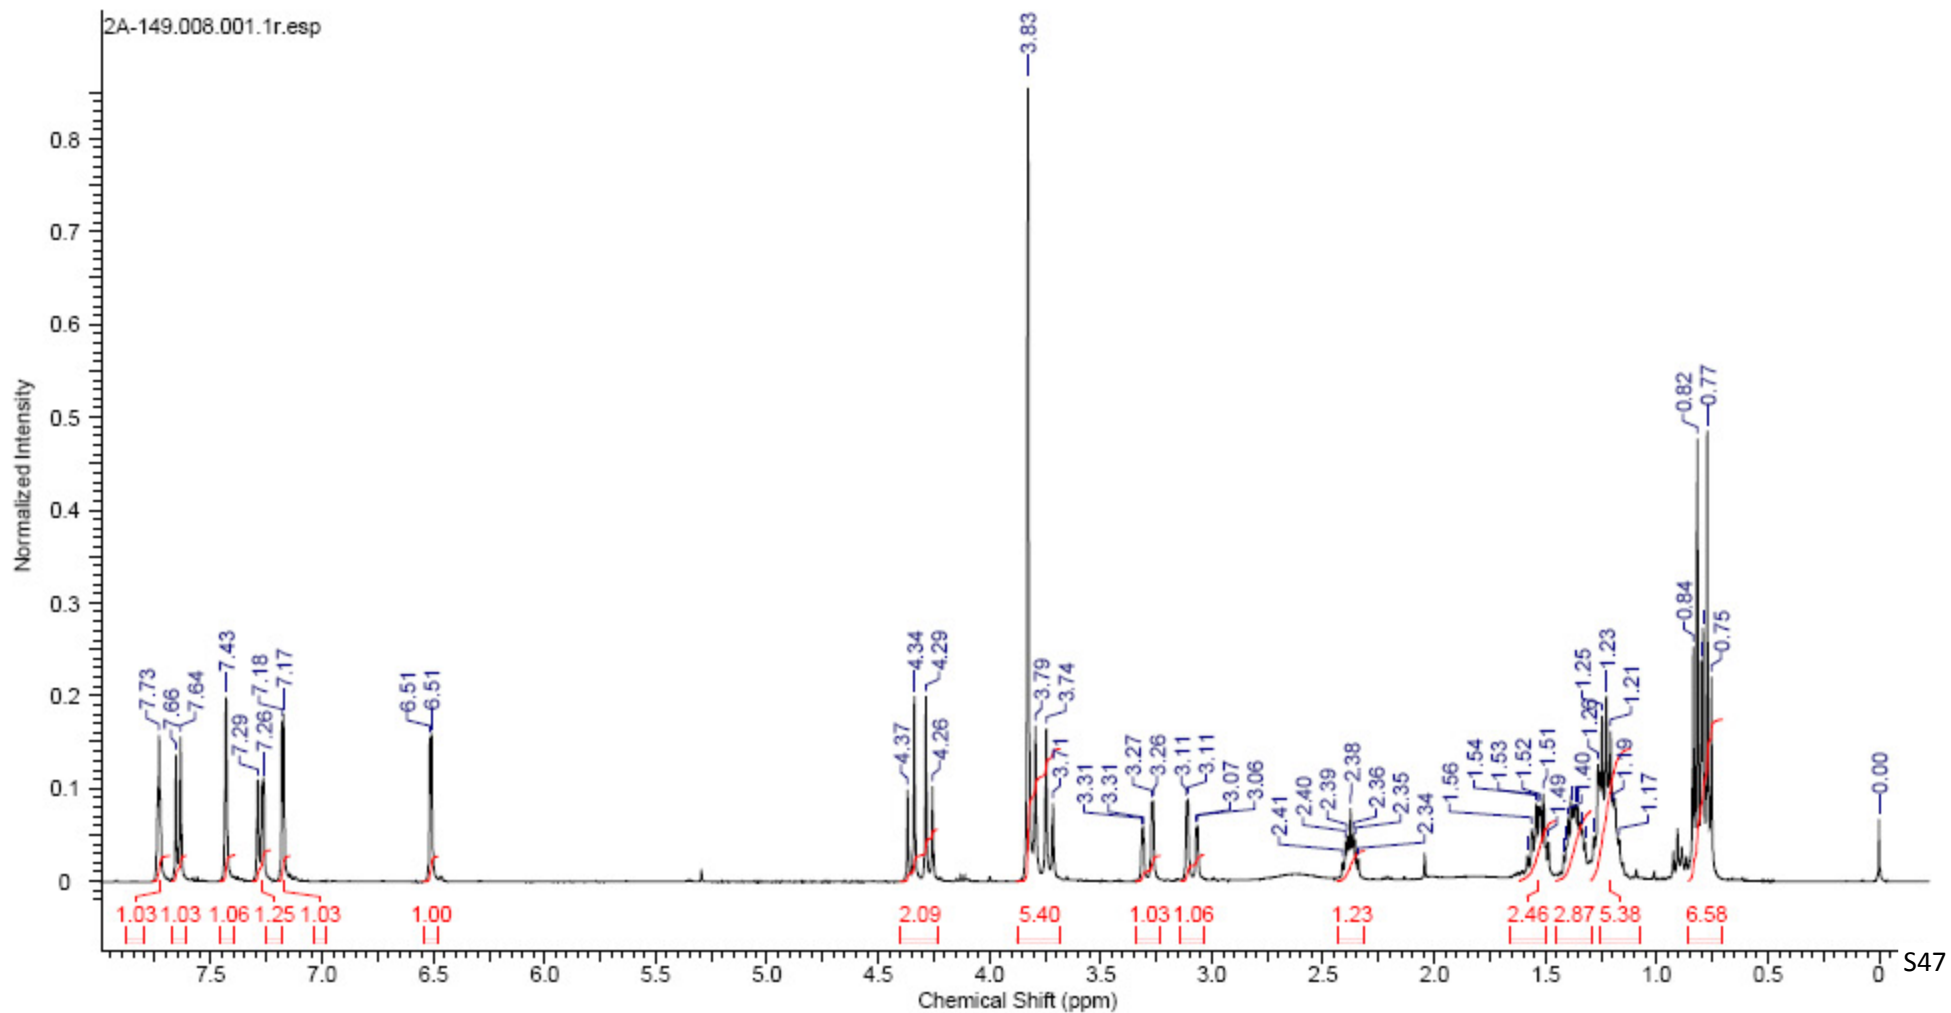

4

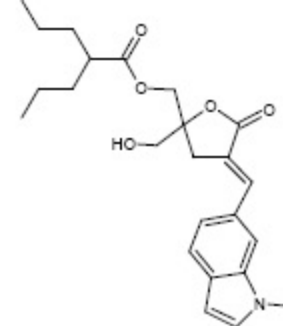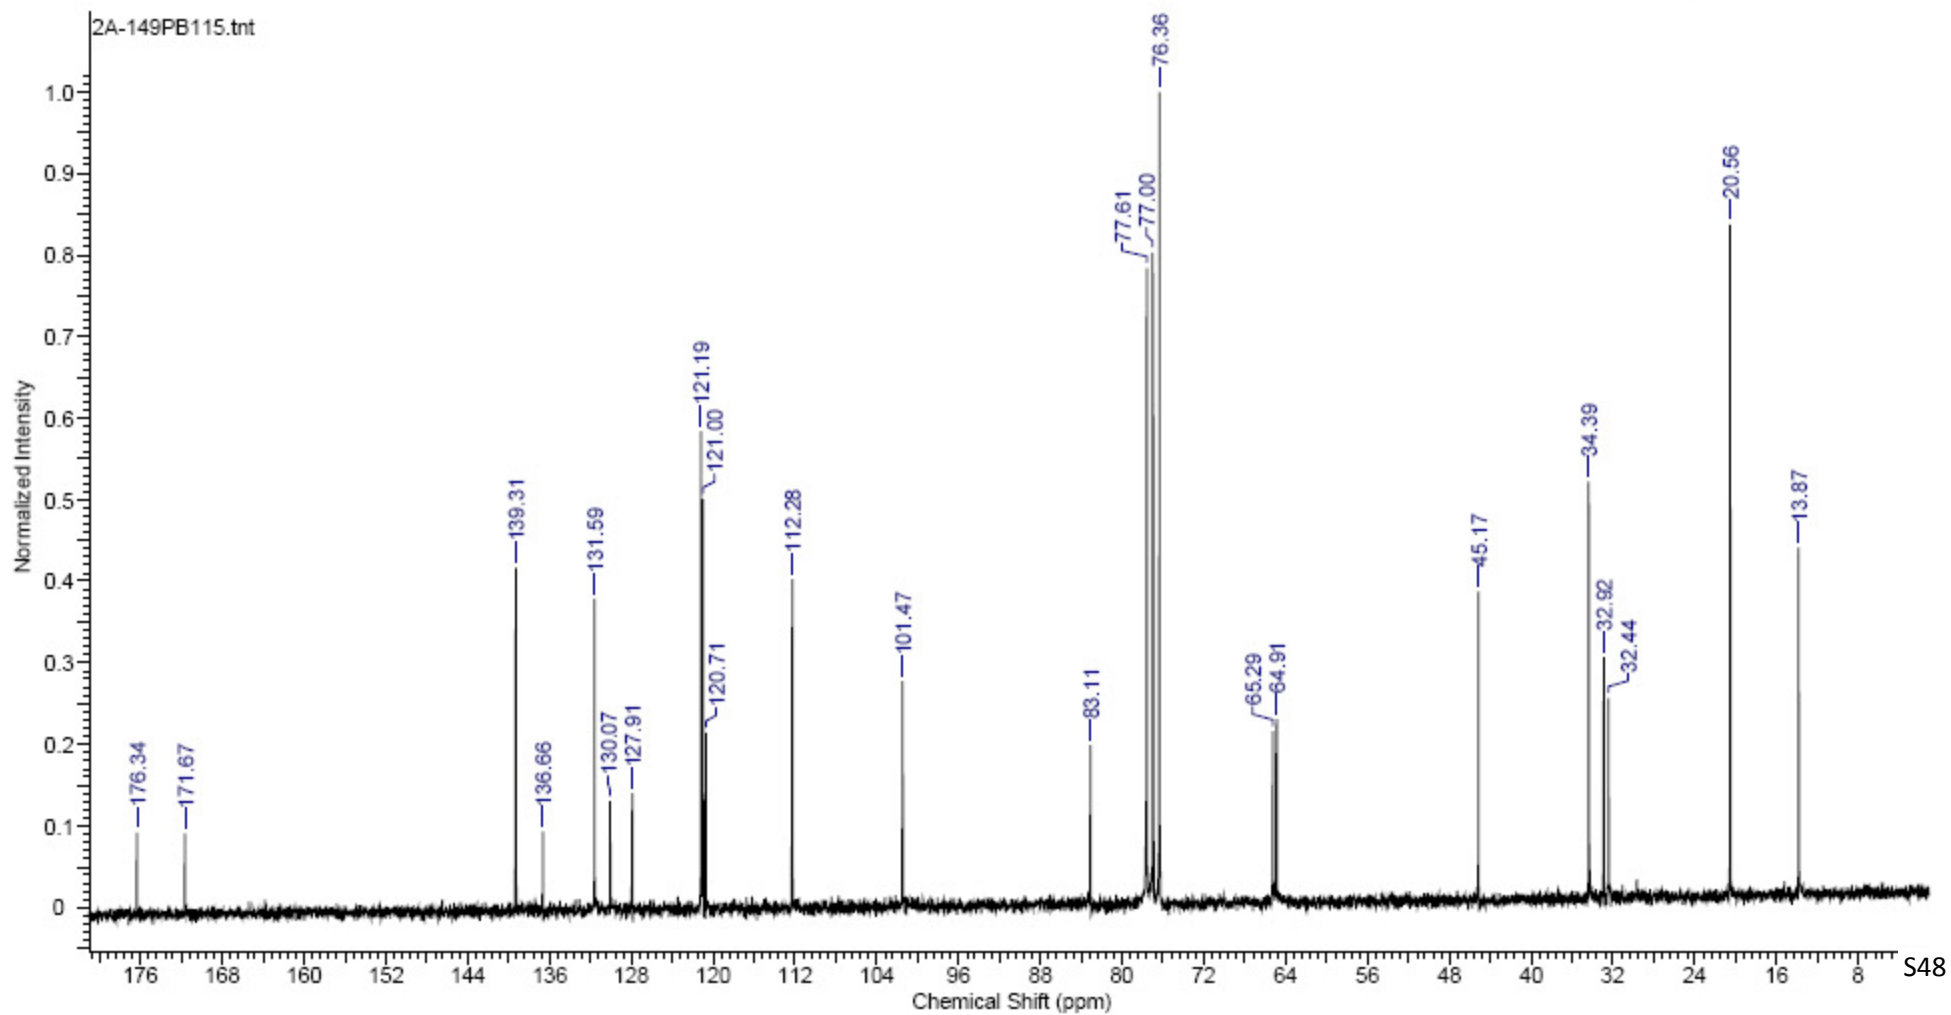



4

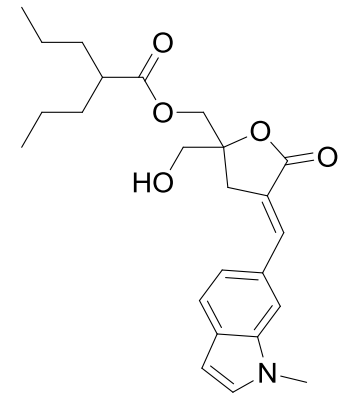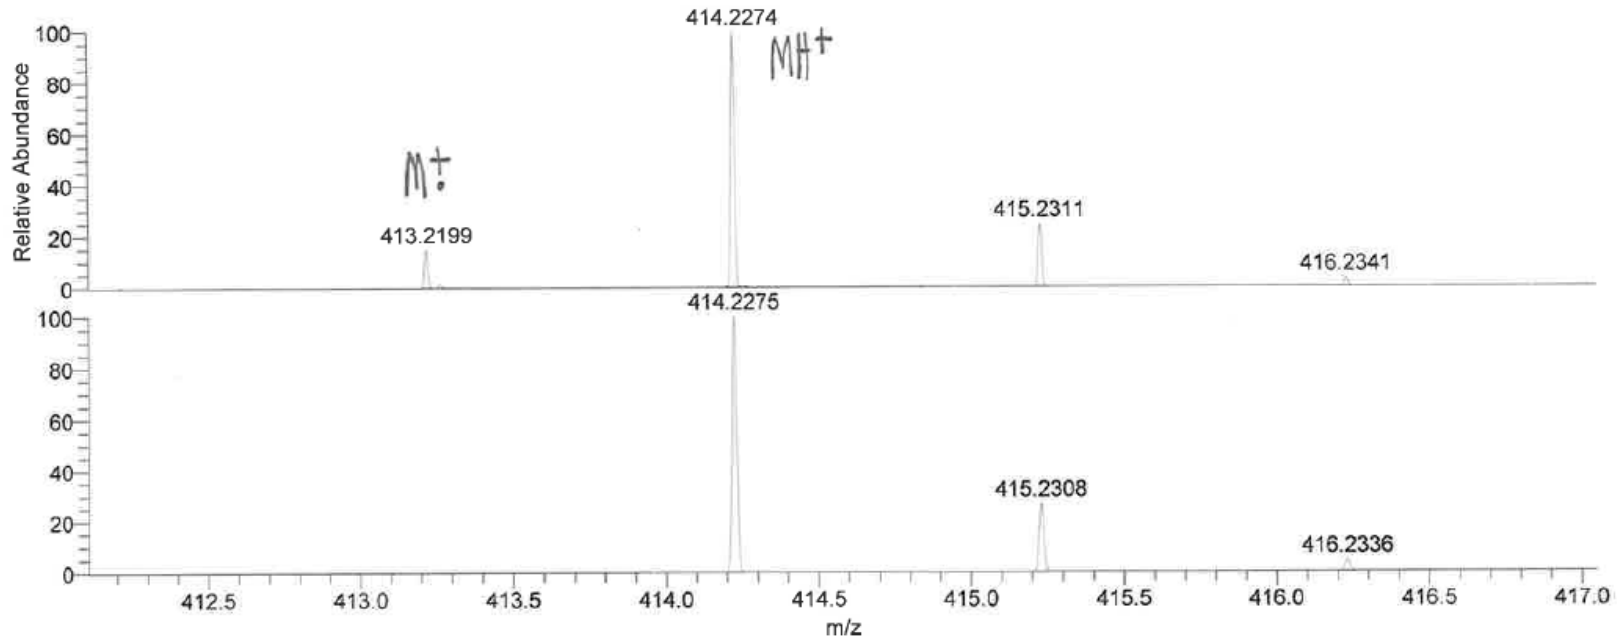

NL:  
4.56E6  
Lactone\_120606133500#31-  
45 RT: 0.25-0.37 AV: 15 SB:  
102 0.45-1.30 F: FTMS + p  
ESI Full ms [100.00-1000.00]

NL:  
1.78E4  
C<sub>24</sub> H<sub>31</sub> NO<sub>5</sub> +H:  
C<sub>24</sub> H<sub>32</sub> N<sub>1</sub> O<sub>5</sub>  
p (gss, s /p:40) Chrg 1  
R: 25000 Res .Pwr . @FWHM

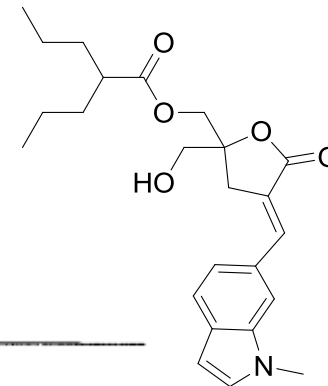

# ATLANTIC MICROLAB, INC.

 Sample No. 115D141-H(2A-149)

## SUBMITTER

 6180 Atlantic Blvd. Suite M  
 Norcross, GA 30071

 Company / School NIH/NCI

 Address 376 Boyles St, Room 220
Frederick, MD 21702
[www.atlanticmicrolab.com](http://www.atlanticmicrolab.com)

 PROFESSOR/SUPERVISOR: Joe Barchi 301-846-1514

NAME

Dr. Dina M. Sigano

 DATE 5/30/12

 P.O. #: Pls call Lora Main @ 301-846-1514 for credit card paym<sup>t</sup>

| Element | Theory  | Found |  | Single <input checked="" type="checkbox"/>                                             | Duplicate <input type="checkbox"/> |
|---------|---------|-------|--|----------------------------------------------------------------------------------------|------------------------------------|
| C       | 69.7100 | 69.70 |  | Elements Present: C, H, N, O                                                           |                                    |
|         | 7.5600  | 7.49  |  | Analyze for: C, H, N                                                                   |                                    |
| N       | 3.3900  | 3.40  |  | Hygroscopic <input type="checkbox"/> Explosive <input type="checkbox"/>                |                                    |
|         |         |       |  | M.P. _____ B.P. _____                                                                  |                                    |
|         |         |       |  | To be dried: Yes <input type="checkbox"/> No <input checked="" type="checkbox"/>       |                                    |
|         |         |       |  | Temp. _____ Vac. _____ Time _____                                                      |                                    |
|         |         |       |  | FAX Service <input type="checkbox"/> EMAIL Service <input checked="" type="checkbox"/> |                                    |
|         |         |       |  | FAX# /EMAIL <u>SIGANOD@MAIL.NIH.GOV</u>                                                |                                    |
|         |         |       |  | Rush Service <input type="checkbox"/> (SEE CURRENT                                     |                                    |
|         |         |       |  | Phone Service <input type="checkbox"/> PRICE LIST)                                     |                                    |
|         |         |       |  | Phone No. _____                                                                        |                                    |

Date Received

JUN 01 2012

Date Completed

JUN 04 2012

Remarks:

5

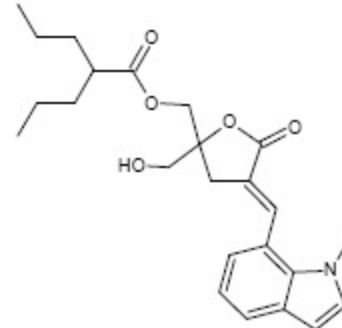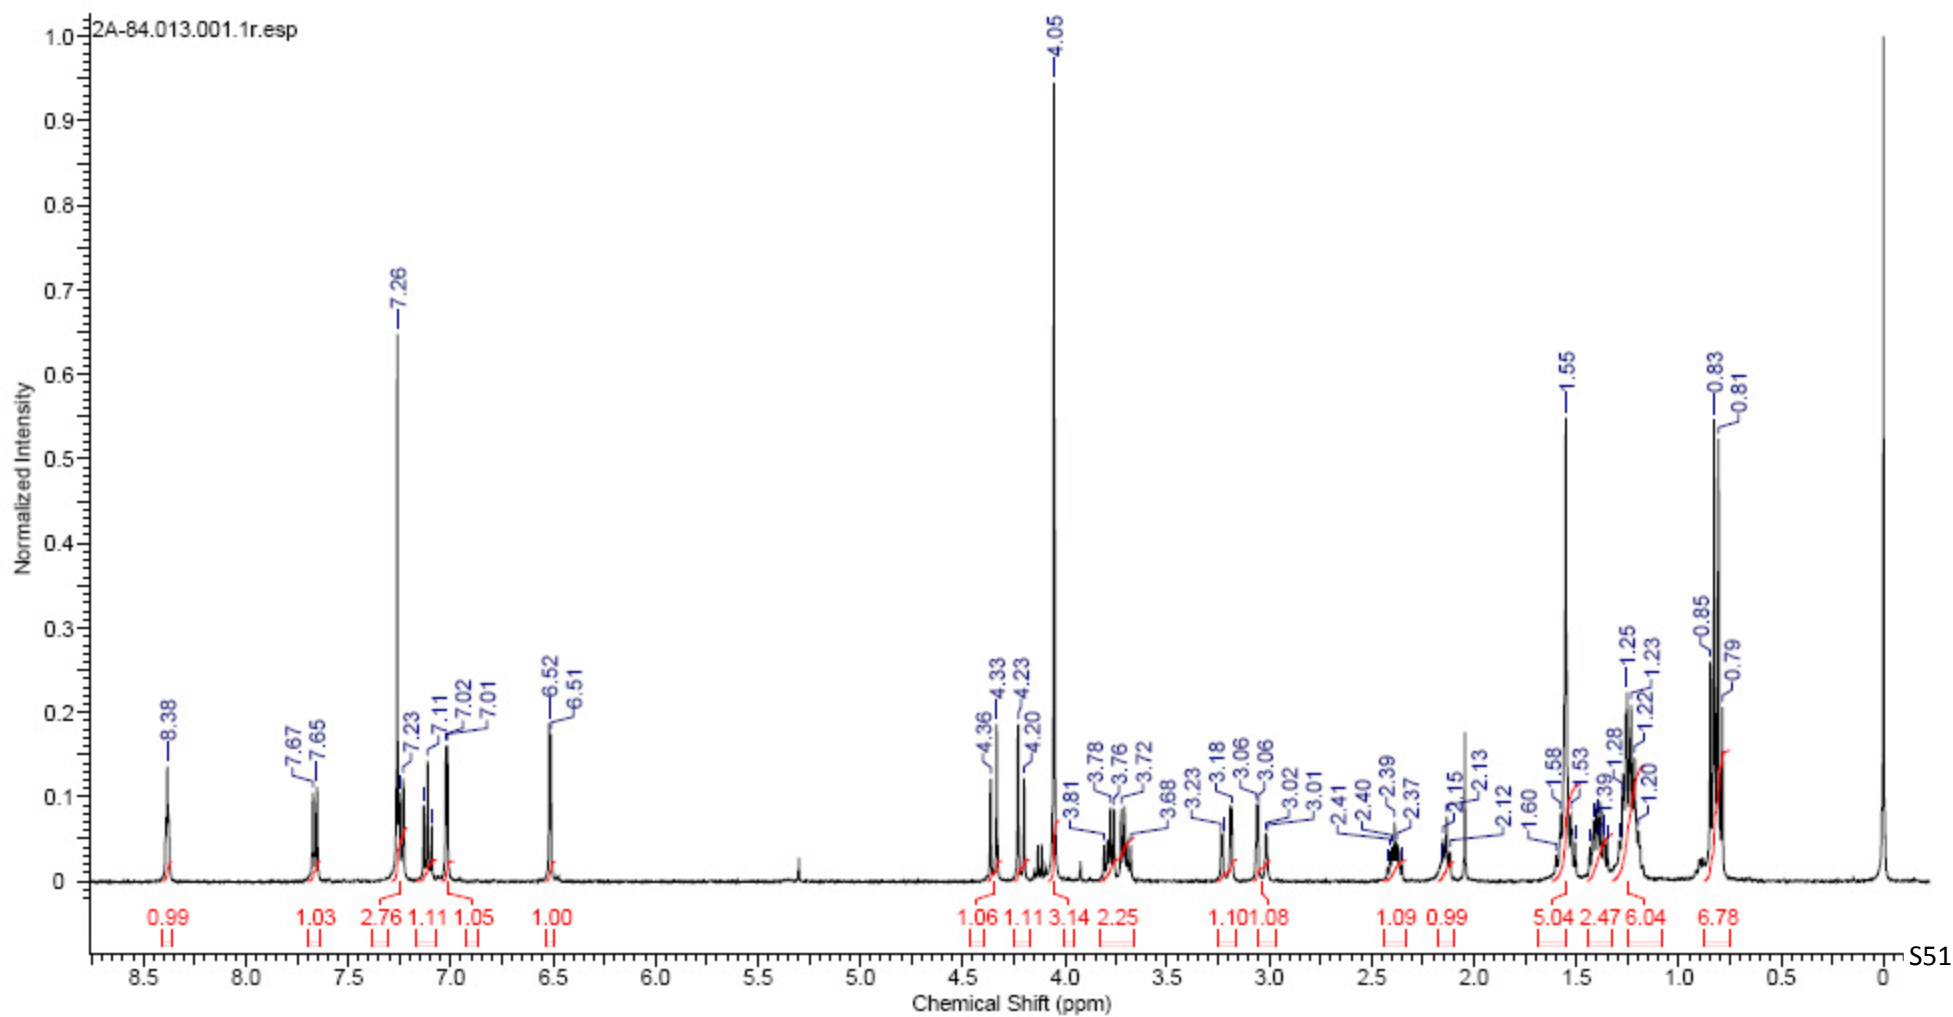

S51

5

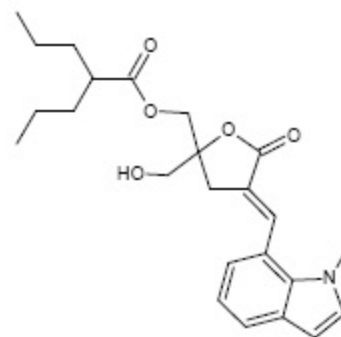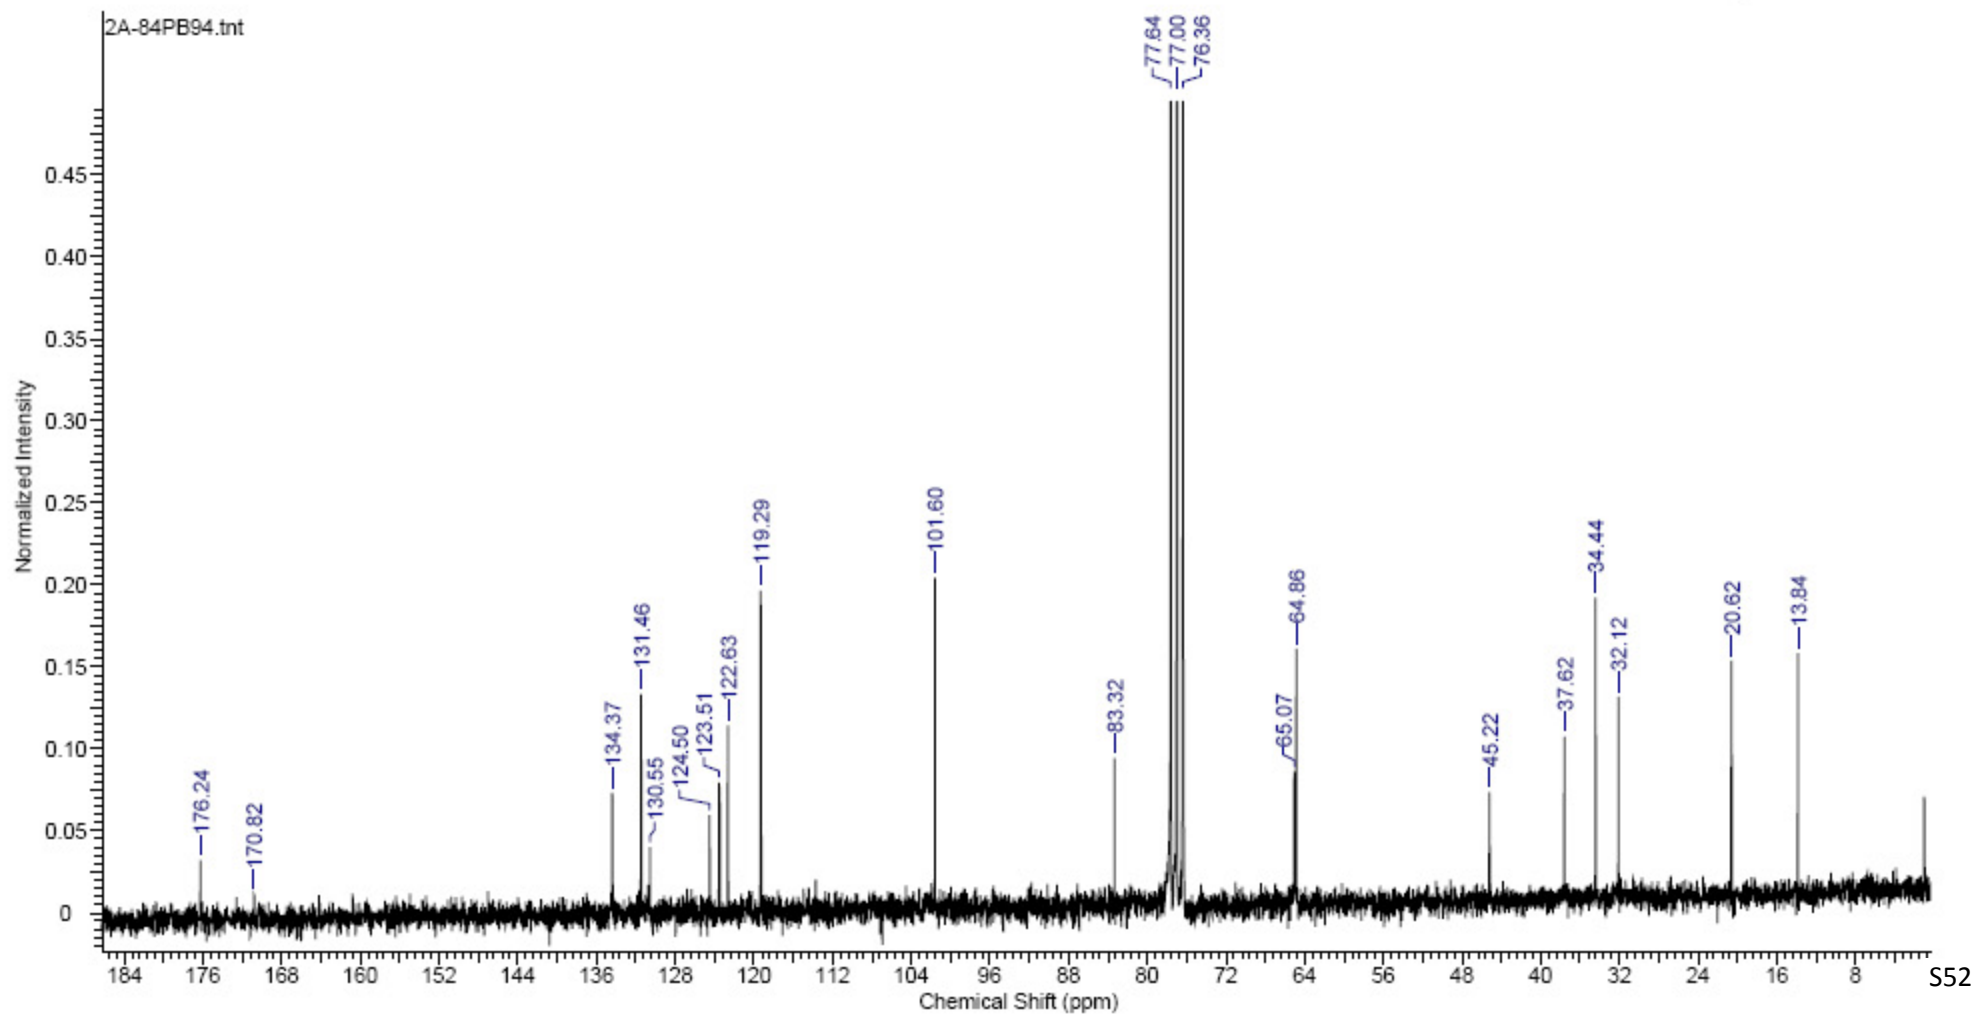

5

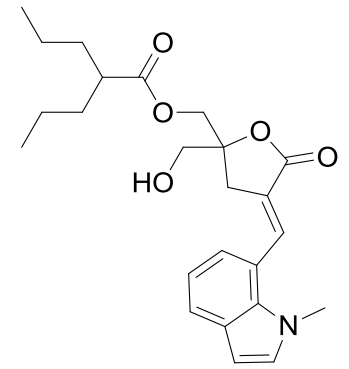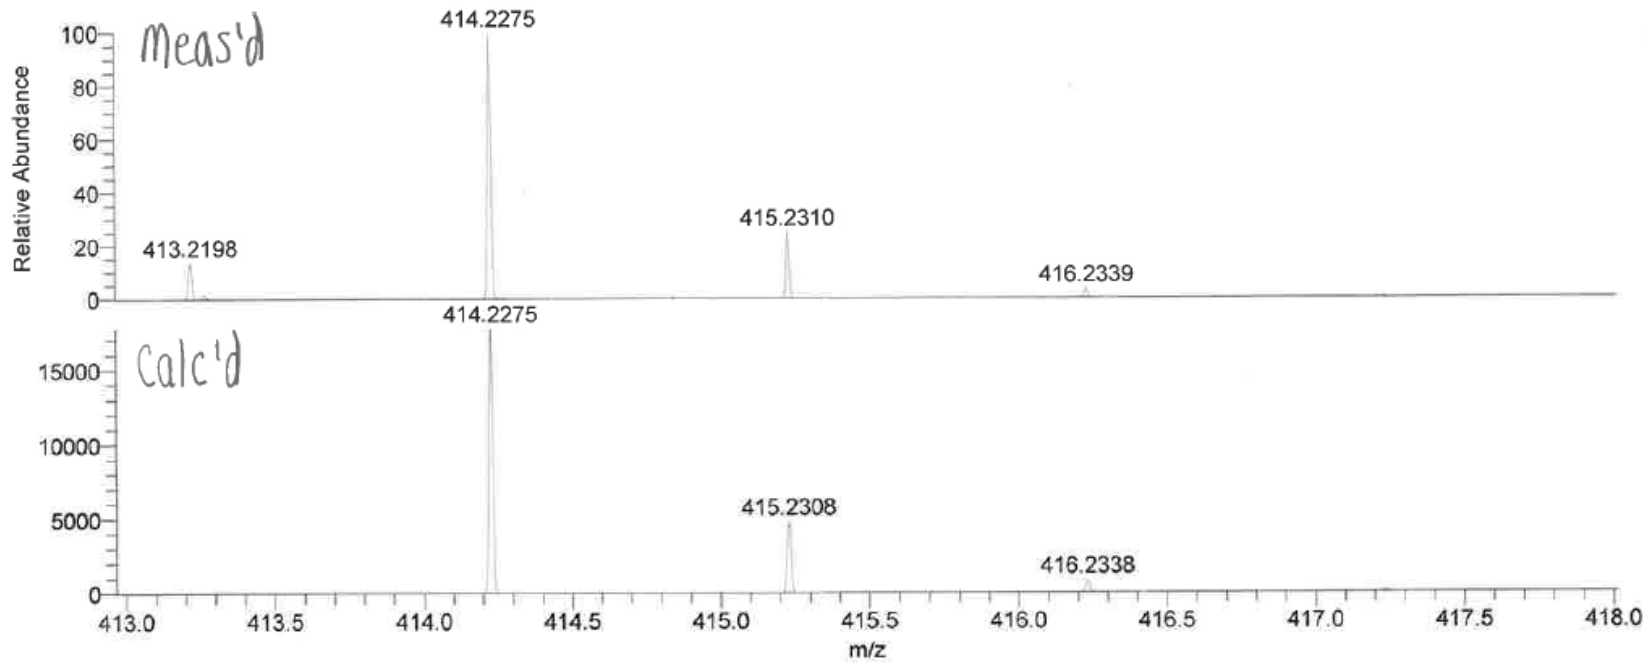

NL:  
3.20E6  
Lactone\_120606135002#32-42  
RT: 0.26-0.35 AV: 11 SB: 40  
0.10-0.24 , 0.45-0.63 F: FTMS  
+ p ESI Full ms  
[100.00-1000.00]

NL:  
1.78E4  
C<sub>24</sub> H<sub>31</sub> NO<sub>5</sub> +H:  
C<sub>24</sub> H<sub>32</sub> N<sub>1</sub> O<sub>5</sub>  
p (gss, s /p:40) Chrg 1  
R: 30000 Res .Pwr , @FWHM

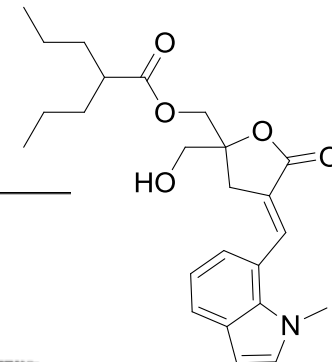

# ATLANTIC MICROLAB, INC.

Sample No. 115D141-D (2A-84)

SUBMITTER

6180 Atlantic Blvd. Suite M  
Norcross, GA 30071

Company / School NIH/NCI

Address 376 Boyles St, Room 220

Frederick, MD 21702

[www.atlanticmicrolab.com](http://www.atlanticmicrolab.com)

PROFESSOR/SUPERVISOR: Joe Barchi *301-846-1574*

NAME Dr. Dina M. Sigano

DATE 5/30/12

P.O. #: Pls call Lora Main @ 301-846-1574 for credit card paym

| Element | Theory  | Found |  | Single <input checked="" type="checkbox"/>                                                                                  | Duplicate <input type="checkbox"/> |
|---------|---------|-------|--|-----------------------------------------------------------------------------------------------------------------------------|------------------------------------|
|         |         |       |  | Elements Present: C, H, N, O                                                                                                |                                    |
| C       | 69.7100 | 69.44 |  | Analyze for: C, H, N                                                                                                        |                                    |
|         | 7.5600  | 7.51  |  | Hygroscopic <input type="checkbox"/> Explosive <input type="checkbox"/><br>M.P. _____ B.P. _____                            |                                    |
| N       | 3.3900  | 3.43  |  | To be dried: Yes <input type="checkbox"/> No <input checked="" type="checkbox"/><br>Temp. _____ Vac. _____ Time _____       |                                    |
|         |         |       |  | FAX Service <input type="checkbox"/> EMAIL Service <input checked="" type="checkbox"/><br>FAX# /EMAIL SIGANOD@MAIL.NIH.GOV  |                                    |
|         |         |       |  | Rush Service <input type="checkbox"/> (SEE CURRENT<br>Phone Service <input type="checkbox"/> PRICE LIST)<br>Phone No. _____ |                                    |

Date Received

JUN 01 2012

Remarks:

Date Completed

JUN 04 2012

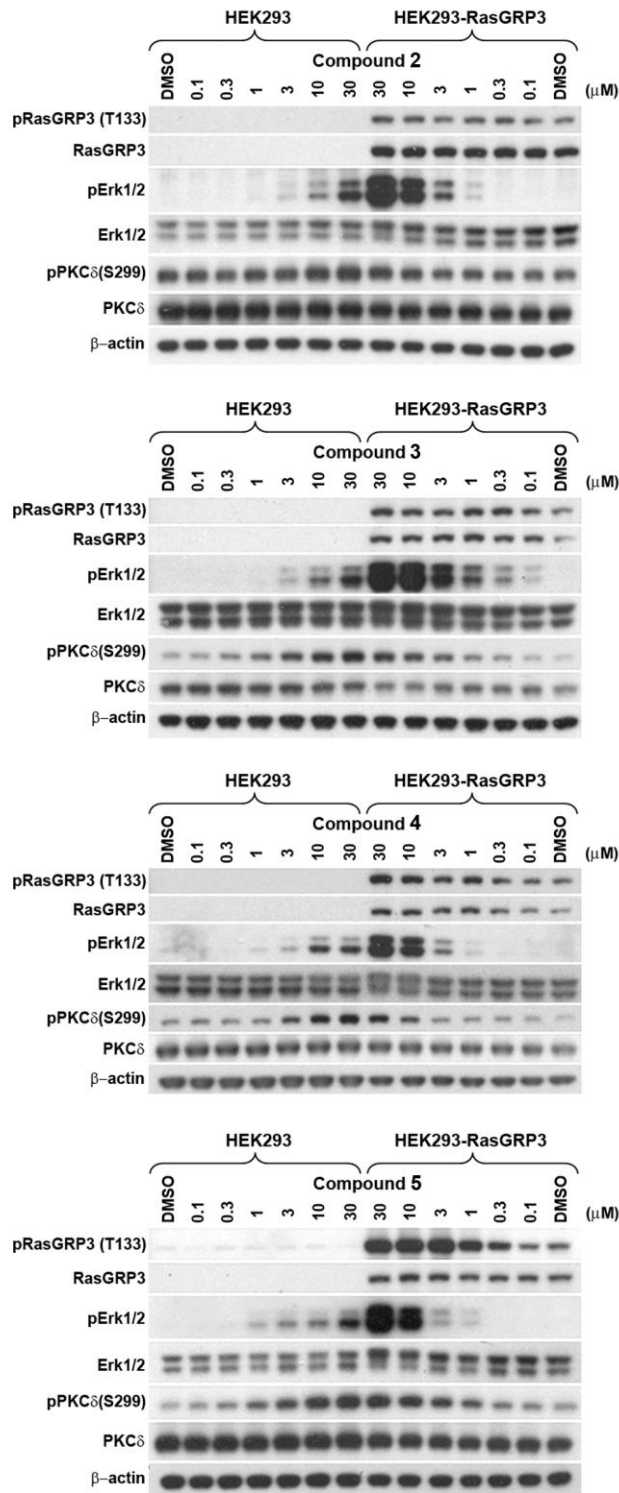

**Supplementary Figure 1.** Response of HEK293 and HEK293 cells overexpressing RasGRP3 to treatment with compounds 2 - 5. Cells were treated for 30 min with the indicated concentrations of compound, after which the cells were lysed and the lysates subjected to electrophoresis and immunoblotting with the antibodies as indicated. Results are representative of the triplicate experiments performed.

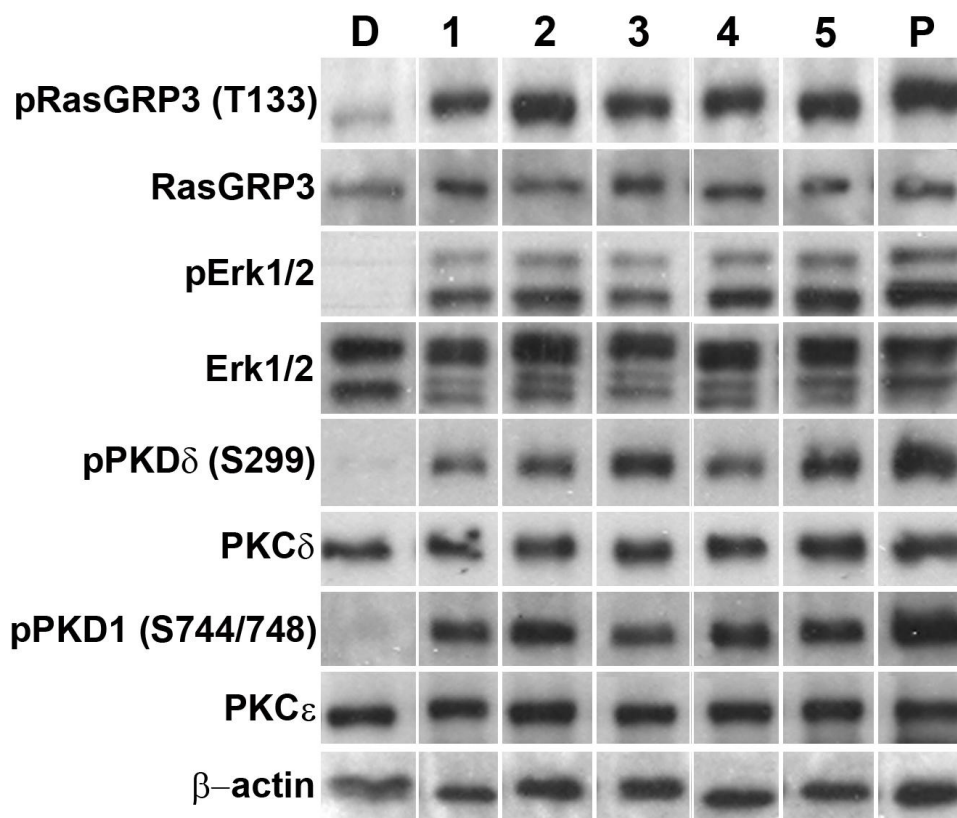

**Supplemental Figure 2.** Biological activity in Ramos cells. Ramos cells were incubated with DMSO (D), the individual compounds **1-5** (10,000 nM), or PMA (P) (1,000 nM) for 30 minutes. Lysates were subjected to western blot to compare compound activities as described in Materials and Methods. The experiment shown is one of three independent experiments.



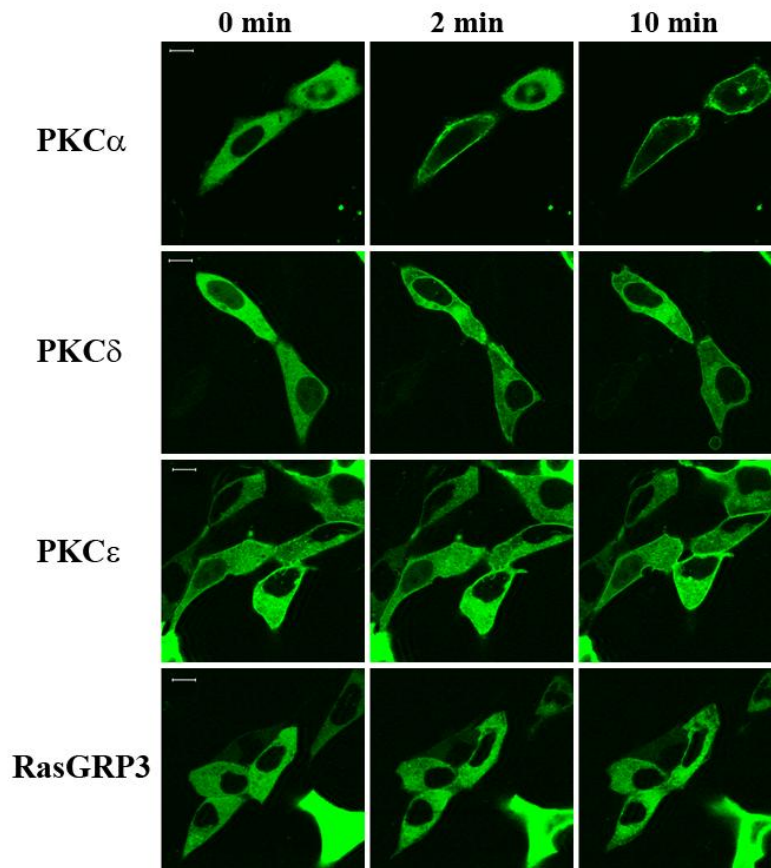

**Supplementary Figure 3.** Translocation of different PKC isoforms and RasGRP3 in living cells in response to PDBu. CHO-K1 cells were transiently transfected with GFP-PKC $\alpha$  and LNCaP cells were transiently transfected with GFP- PKC $\delta$ , YFP-PKC $\epsilon$ , or GFP-RasGRP3. The translocation pattern was examined by confocal microscopy as a function of time after treatment with PDBu (1000 nM). Each panel represents images typical of the experiments performed (n = 3). Bars are 10  $\mu$ m.

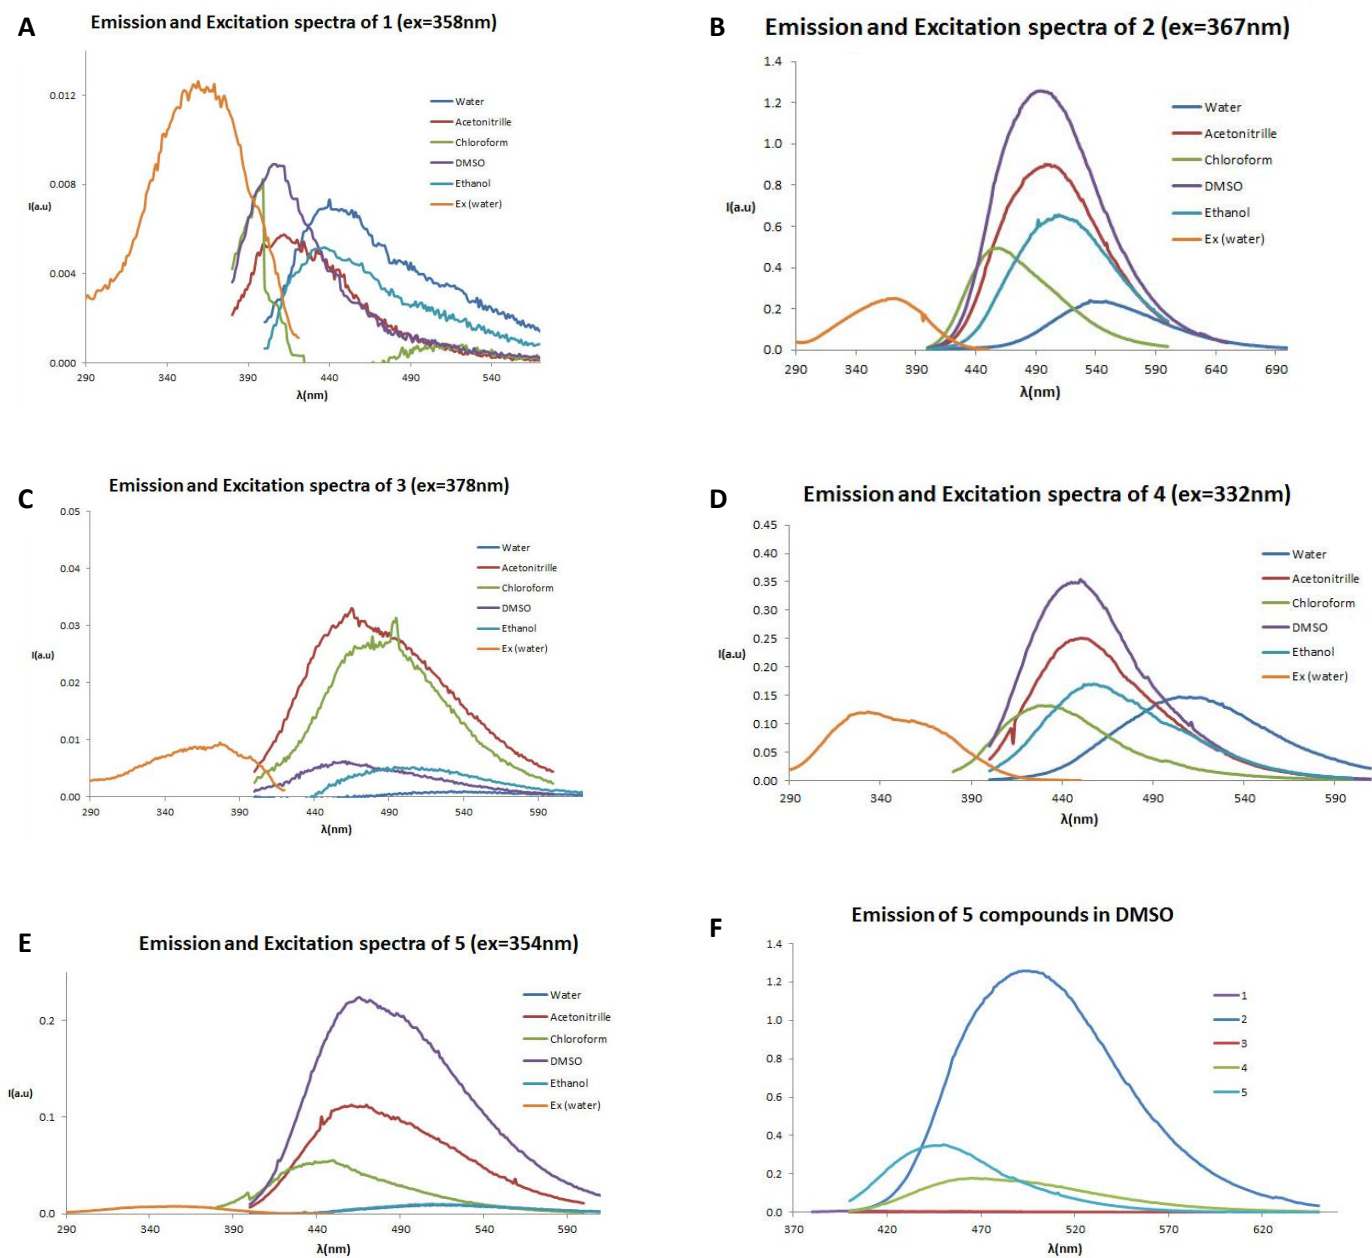

**Supplementary Figure 4.** Fluorescence measurements of compounds 1 to 5 in different solvents (6.05  $\mu\text{M}$ ). A) Compound 1; B) Compound 2; C) Compound 3; D) Compound 4; E) Compound 5; F) Comparison of fluorescence emission of compounds 1 to 5 in DMSO.

**Fluorescence measurements.** Fluorescence measurements of the compound's intrinsic emission and excitation was measured by dissolving the compounds (1mg/ml in DMSO) in 1mL of the required solvent up to a final concentration of 6.05 $\mu$ M. Fluorescence excitation and emission spectra were acquired at 27°C on a FL920 spectrofluorimeter (Edinburgh, Co., Edinburgh, UK) by using the compound's excitation and emissionwavelengths. Solutions were placed in a quartz cell with a 0.5 cm optical path-length. Light scattering from the vesicles was confirmed to account for less than 5% of the emission intensity.
